# Supplementary material
Source: PubMed Central journal article supplement (PMC3108857)

## SUPPORTING INFORMATION

### On the Synthesis of Conformationally Modified Peptides Through Isonitrile Chemistry: Implications for Dealing with Polypeptide Aggregation

Xiangyang Wu,<sup>a</sup> Peter K. Park,<sup>a</sup> and Samuel J. Danishefsky<sup>a,b\*</sup>

<sup>a</sup> Laboratory for Bioorganic Chemistry, Sloan-Kettering Institute for Cancer Research, 1275 York Avenue, New York, New York 10021, and <sup>b</sup> Department of Chemistry, Columbia University, Havemeyer Hall, 3000 Broadway, New York, New York 10027

[s-danishefsky@ski.mskcc.org](mailto:s-danishefsky@ski.mskcc.org)

**General Information.** All commercial materials (Aldrich, Fluka) were used without further purification. All solvents were reagent grade or HPLC grade (Fisher). Anhydrous THF, diethyl ether, CH<sub>2</sub>Cl<sub>2</sub>, *n*-PrOH, toluene, and benzene were passed through a column of alumina and used without further drying. <sup>1</sup>H NMR spectra and <sup>13</sup>C NMR spectra were recorded on a Bruker AVANCE DRX-500 MHz or DRX-600 MHz at ambient temperature unless otherwise stated. Chemical shifts are reported in parts per million relative to residual solvent CDCl<sub>3</sub> (<sup>1</sup>H, 7.26 ppm; <sup>13</sup>C, 77.0 ppm) or 2,2-dimethyl-2-silapentane-5-sulfonate (DSS) internal reference for spectra taken in D<sub>2</sub>O (<sup>1</sup>H, 0 ppm; <sup>13</sup>C shifts referenced indirectly using  $\Xi_c = 25.144953\%$  without temperature correction<sup>1</sup>). Multiplicities are reported as follows: s = singlet, d = doublet, t = triplet, q = quartet, m = multiplet. All <sup>13</sup>C NMR spectra were recorded with complete proton decoupling. Low-resolution mass spectral analyses were performed with a JEOL JMS-DX-303-HF mass spectrometer or Waters Micromass ZQ mass spectrometer. High-resolution mass spectral analyses were performed by the MSKCC core facility staff. All reactions were carried out in oven-dried glassware under an argon or nitrogen atmosphere unless otherwise noted. Analytical TLC was performed on E. Merck silica gel 60 F254 plates and visualized by UV fluorescence quenching and CAM staining. Flash column chromatography was performed on E. Merck silica gel 60 (40–63 mm). Yields refer to chromatographically and spectroscopically pure compounds.

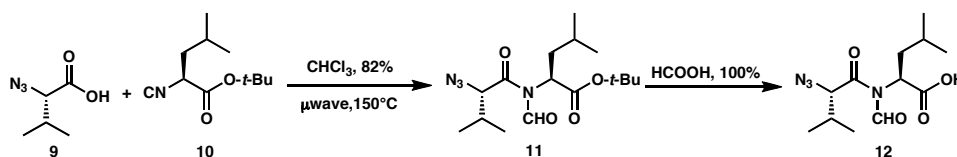

**(S)-2-((S)-2-azido-*N*-formyl-3-methylbutanamido)-4-methylpentanoic acid (12).** To a solution of N<sub>3</sub>-valine **9** (43 mg, 0.3 mmol) in CHCl<sub>3</sub> (1 mL) was added leucine isonitrile **10** (60 mg, 0.3 mmol). The resulting mixture was heated to 150 °C in the microwave for 30 min, then the solvent was evaporated at low pressure to give an oil. The crude residue was purified by flash chromatography using hexanes:ethyl acetate (15:1) as eluent to give the *N*-formyl dipeptide **11** (83.6 mg, 82% yield). Compound **11** (83.6 mg, 0.25 mmol) was subsequently dissolved in formic acid (2 mL). The reaction mixture was stirred at room temperature for four hours. The resulting solution was evaporated at low

(1) Harris, R. K.; Becker, E. D.; Cabral de Menezes, S. M.; Granger, P.; Hoffman, R. E.; Zilm, K. W. *Pure Appl. Chem.* **2008**, *80*, 59–84.

pressure to give compound **12** without further purification (70 mg, 100%). Characterization of compound **11**:  $[\alpha]_D^{25} = -48.3$ , ( $c = 1.0$ ,  $\text{CHCl}_3$ );  $^1\text{H NMR}$  (500 MHz,  $\text{CDCl}_3$ ),  $\delta = 9.06$  (1H, s), 5.05–5.02 (1H, dd,  $^3J = 4.8$  Hz, 9.8 Hz), 3.90 (1H, d,  $^3J = 7.8$  Hz), 2.30–2.26 (1H, m), 1.95–1.89 (1H, m), 1.77–1.71 (1H, m), 1.37 (10H, m), 1.06 (3H, d,  $^3J = 6.7$  Hz), 0.98 (3H, d,  $^3J = 6.7$  Hz), 0.88–0.85 (6H, m);  $^{13}\text{C NMR}$  (125 MHz,  $\text{CDCl}_3$ ),  $\delta = 170.7$ , 168.4, 161.3, 82.1, 66.9, 52.8, 37.2, 30.7, 27.7, 25.2, 23.0, 19.4, 18.4; IR (thin film): 2961.2, 2116.6, 1734.7, 1679.7, 1469.5, 1369.2; Exact mass calc'd for  $\text{C}_{16}\text{H}_{28}\text{N}_4\text{O}_4$   $[\text{M}+\text{Na}]^+$ : 363.2,  $[\text{M}+\text{K}]^+$ : 379.2, found: 363.1, 379.1.

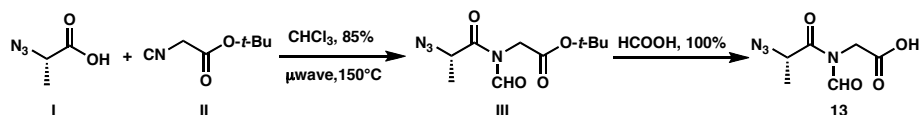

**(S)-2-(2-azido-N-formylpropanamido)acetic acid (13)**. To a solution of  $\text{N}_3$ -alanine **I** (115 mg, 1 mmol) in  $\text{CHCl}_3$  (3 mL) was added glycine isonitrile **II** (141 mg, 1 mmol). The resulting mixture was heated to 150 °C in the microwave for 30 min, then the solvent was evaporated at low pressure to give an oil. The crude residue was purified by flash chromatography using hexanes:ethyl acetate (10:1) as eluent to give the *N*-formyl dipeptide **III** (218 mg, 85% yield). Compound **III** (166 mg, 0.65 mmol) was subsequently dissolved in formic acid (4 mL). The reaction mixture was stirred at room temperature for four hours. The resulting solution was evaporated at low pressure to give compound **13** without further purification (130 mg, 100%). Characterization of compound **III**:  $[\alpha]_D^{25} = -58.3$ , ( $c = 1.0$ ,  $\text{CHCl}_3$ );  $^1\text{H NMR}$  (500 MHz,  $\text{CDCl}_3$ ),  $\delta = 9.1$  (1H, s), 4.30–4.27 (3H, m), 5.09 (2H, s), 1.59–1.57 (1H, d,  $^3J = 6.8$  Hz), 1.41 (9H, s);  $^{13}\text{C NMR}$  (125 MHz,  $\text{CDCl}_3$ ),  $\delta = 171.1$ , 166.2, 161.4, 82.7, 55.9, 55.8, 42.1, 27.9, 15.5; IR (thin film): 2960.2, 2108.7, 1731.7, 1678.6, 1467.5, 1365.2; Exact mass calc'd for  $\text{C}_{10}\text{H}_{16}\text{N}_4\text{O}_4$   $[\text{M}+\text{Na}]^+$ : 279.1;  $[\text{M}-\text{H}]^-$ : 255.2, found: 279.2, 255.3.

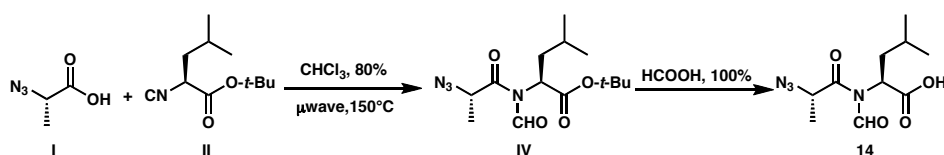

**(S)-2-((S)-2-azido-N-formylpropanamido)-4-methylpentanoic acid (14)**. The procedure used was analogous to the preparation of **13** and used  $\text{N}_3$ -alanine **I** (23 mg, 0.2 mmol), leucine isonitrile **II** (59 mg, 0.3 mmol),  $\text{CHCl}_3$  (1.5 mL), and formic acid (2 mL). Purification by flash chromatography using hexanes:ethyl acetate (15:1) gave the *N*-formyl dipeptide **IV** (50 mg, 80% over two steps). Characterization of compound **IV**:  $[\alpha]_D^{25} = -53.3$ , ( $c = 1.0$ ,  $\text{CHCl}_3$ );  $^1\text{H NMR}$  (600 MHz,  $\text{CDCl}_3$ ),  $\delta = 9.06$  (1H, s), 5.05–5.02 (1H, dd,  $^3J = 4.9$  Hz, 9.6 Hz), 4.33–4.32 (1H, dd,  $^3J = 6.7$  Hz), 1.94–1.92 (1H, m), 1.82–1.80 (1H, m), 1.61 (3H, d,  $^3J = 6.8$  Hz), 1.45–1.39 (10H, m), 0.91–0.89 (6H, m);  $^{13}\text{C NMR}$  (150 MHz,  $\text{CDCl}_3$ ),  $\delta = 171.1$ , 168.5, 161.6, 82.3, 56.2, 53.1, 37.7, 28.0, 27.8, 25.3, 23.1, 21.7, 15.6; IR (thin film): 2961.2, 2108.8, 1732.7, 1678.7, 1469.5, 1368.2; Exact mass calc'd for  $\text{C}_{14}\text{H}_{24}\text{N}_4\text{O}_4$   $[\text{M}+\text{Na}]^+$ : 335.2,  $[\text{M}-\text{H}]^-$ : 311.2, found: 335.1, 311.0.

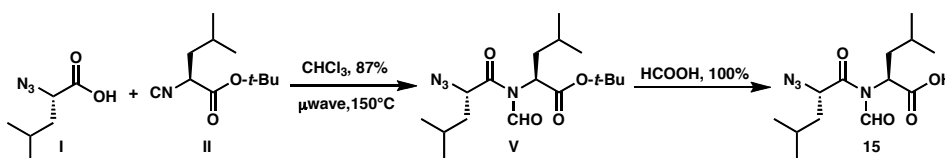

**(S)-2-((S)-2-azido-*N*-formyl-4-methylpentanamido)-4-methylpentanoic acid (15).** The procedure used was analogous to the preparation of **13** and used N<sub>3</sub>-leucine **I** (32 mg, 0.2 mmol), leucine isonitrile **II** (60 mg, 0.3 mmol), CHCl<sub>3</sub> (1.5 mL), and formic acid (2 mL). Purification by flash chromatography using hexanes:ethyl acetate (15:1) gave the *N*-formyl dipeptide **15** (52 mg, 87% over two steps). Characterization of compound **V**: [α]<sub>D</sub> = -62.3, (c = 1.0, CHCl<sub>3</sub>); <sup>1</sup>H NMR (600 MHz, CDCl<sub>3</sub>), δ = 9.0 (1H, s), 5.03–5.00 (1H, dd, <sup>3</sup>J = 4.8 Hz, 9.7 Hz), 4.17 (1H, m), 1.92–1.70 (5H, m), 1.37 (10H, m), 0.95–0.85 (12H, m); <sup>13</sup>C NMR (150 MHz, CDCl<sub>3</sub>), δ = 171.4, 168.4, 161.3, 82.2, 59.2, 52.9, 39.0, 37.5, 27.7, 25.2, 23.0, 22.7, 21.6, 21.5; IR (thin film): 2961.2, 2116.6, 1734.7, 1679.7, 1469.5, 1369.2; Exact mass calc'd for C<sub>17</sub>H<sub>30</sub>N<sub>4</sub>O<sub>4</sub> [M+Na]<sup>+</sup>: 377.2, [M+K]<sup>+</sup>: 393.2, found: 377.1, 393.1.

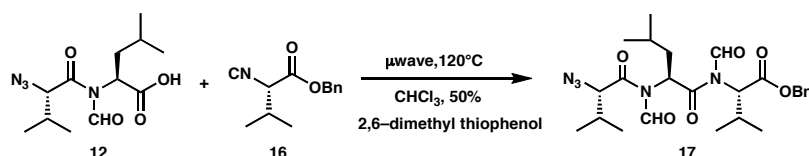

**(S)-benzyl 2-((S)-2-((S)-2-azido-*N*-formyl-3-methylbutanamido)-*N*-formyl-4-methylpentanamido)-3-methylbutanoate (17).** To a solution of dipeptide **12** (113 mg, 0.4 mmol) and valine isonitrile **16** (260 mg, 1.2 mmol) in CHCl<sub>3</sub> (4.0 mL) was added 2,6-dimethyl thiophenol (54 μL, 0.4 mmol). The resulting reaction mixture was stirred at 120 °C under microwave irradiation for two hours. The solution was cooled to room temperature and evaporated at low pressure. The crude residue was purified by flash chromatography using hexanes:ethyl acetate (20:1) as eluent to give the bis-*N*-formyl tripeptide **17** (100 mg, 50%). [α]<sub>D</sub> = -27.9, (c = 1.0, CHCl<sub>3</sub>); <sup>1</sup>H NMR (600 MHz, CDCl<sub>3</sub>), δ = 8.95 (1H, s), 8.81 (1H, s), 7.37–7.26 (5H, m), 5.67–5.64 (1H, dd, <sup>3</sup>J = 6.2 Hz), 5.16–5.07 (2H, dd, <sup>2</sup>J = 12.2 Hz), 4.59 (1H, m), 4.23 (1H, m), 2.58–2.54 (1H, m), 2.23–2.20 (1H, m), 1.89–1.85 (2H, m), 1.54–1.52 (1H, m), 1.14–1.13 (3H, d, <sup>3</sup>J = 6.5 Hz), 1.02–0.90 (15H, m), 0.78 (3H, d, <sup>3</sup>J = 6.8 Hz); <sup>13</sup>C NMR (150 MHz, CDCl<sub>3</sub>), δ = 171.9, 171.8, 169.0, 161.9, 161.5, 135.2, 128.6, 128.5, 128.4, 67.8, 67.3, 60.5, 53.5, 38.6, 30.8, 28.0, 24.9, 22.8, 21.5, 21.4, 19.5, 19.2, 18.0; IR (thin film): 2965.0, 2106.9, 1728.9, 1682.6, 1467.6, 1186.0; Exact mass calc'd for C<sub>25</sub>H<sub>35</sub>N<sub>5</sub>O<sub>6</sub> [M+Na]<sup>+</sup>: 524.3, found: 524.4.

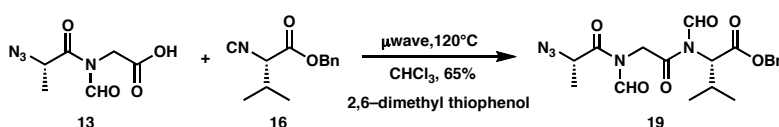

**(S)-benzyl 2-(2-((S)-2-azido-*N*-formylpropanamido)-*N*-formylacetamido)-3-methylbutanoate (19)** The procedure used was analogous to the preparation of **17** and used dipeptide **13** (40 mg, 0.2 mmol), valine isonitrile **16** (65 mg, 0.3 mmol), CHCl<sub>3</sub> (1.5 mL), and 2,6-dimethyl thiophenol (27 μL, 0.2 mmol). Purification by flash chromatography using hexanes:ethyl acetate (10:1) gave the bis-*N*-formyl tripeptide **19** (54 mg, 65%). [α]<sub>D</sub> = -56.3, (c = 1.0, CHCl<sub>3</sub>); <sup>1</sup>H NMR (600 MHz, CDCl<sub>3</sub>), δ = 9.20 (1H, s), 9.02 (1H, s), 7.37–7.26 (5H, m), 5.16–5.10 (2H, m), 4.90 (2H, m), 4.80–4.77 (1H, d, <sup>3</sup>J = 7.8 Hz), 4.29 (1H, m), 2.53–2.48 (1H, m), 1.64–1.63 (3H, d, <sup>3</sup>J = 6.8 Hz), 1.12 (3H, d, <sup>3</sup>J = 6.5 Hz), 0.85–0.83 (3H, d, <sup>3</sup>J = 6.9 Hz); <sup>13</sup>C NMR (150 MHz, CDCl<sub>3</sub>), δ = 170.8, 169.1, 161.6, 135.1, 128.6, 128.4,

67.4, 59.8, 57.2, 56.0, 28.6, 21.2, 19.0, 18.9, 16.2, 16.0, 15.4; IR (thin film): 2960.2, 2113.6, 1731.2, 1679.6, 1465.4, 1365.2; Exact mass calc'd for C<sub>19</sub>H<sub>23</sub>N<sub>5</sub>O<sub>6</sub> [M+Na]<sup>+</sup>: 440.2, found: 440.4.

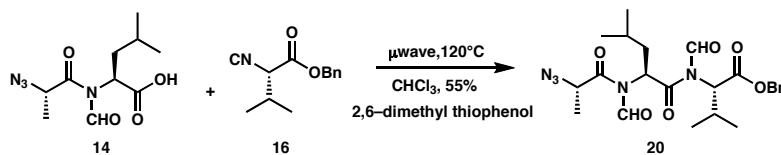

**(S)-benzyl 2-((S)-2-((S)-2-azido-N-formylpropanamido)-N-formyl-4-methylpentanamido)-3-methylbutanoate (20)** The procedure used was analogous to the preparation of **17** and used dipeptide **14** (26 mg, 0.1 mmol), valine isonitrile **16** (65 mg, 0.3 mmol), CHCl<sub>3</sub> (1.5 mL), and 2,6-dimethyl thiophenol (13 μL, 0.1 mmol). Purification by flash chromatography in hexanes:ethyl acetate (10:1) gave the bis-N-formyl tripeptide **20** (26 mg, 55%). [α]<sub>D</sub> = -112.3, (c = 1.0, CHCl<sub>3</sub>); <sup>1</sup>H NMR (500 MHz, CDCl<sub>3</sub>), δ = 8.92 (1H, s), 8.83 (1H, s), 7.36–7.26 (5H, m), 5.61–5.60 (1H, d, <sup>3</sup>J = 6.5 Hz), 5.15–5.09 (2H, dd, <sup>2</sup>J = 12.2 Hz), 4.50 (1H, m), 4.39 (1H, m), 2.58 (1H, m), 1.90–1.84 (2H, m), 1.53–1.49 (4H, m), 1.14–1.13 (3H, d, <sup>3</sup>J = 6.4 Hz), 0.92–0.90 (6H, m), 0.79 (3H, d, <sup>3</sup>J = 6.8 Hz); <sup>13</sup>C NMR (150 MHz, CDCl<sub>3</sub>), δ = 172.1, 171.9, 162.0, 161.6, 135.2, 128.6, 128.5, 128.4, 67.4, 60.6, 57.3, 38.5, 28.1, 24.9, 22.8, 21.5, 21.4, 19.3, 15.6; IR (thin film): 2963.1, 2111.7, 1740.4, 1682.6, 1445.9, 1179.2; Exact mass calc'd for C<sub>23</sub>H<sub>31</sub>N<sub>5</sub>O<sub>6</sub> [M+Na]<sup>+</sup>: 496.22, found: 496.39.

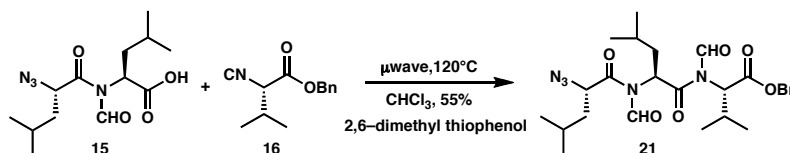

**(S)-benzyl 2-((S)-2-((R)-2-azido-N-formyl-4-methylpentanamido)-N-formyl-4-methylpentanamido)-3-methylbutanoate (21)** The procedure used was analogous to the preparation of **17** and used dipeptide **15** (60 mg, 0.2 mmol), valine isonitrile **16** (130 mg, 0.6 mmol), CHCl<sub>3</sub> (2.0 mL), and 2,6-dimethyl thiophenol (27 μL, 0.2 mmol). Purification by flash chromatography in hexanes:ethyl acetate (20:1) gave the bis-N-formyl tripeptide **21** (56.6 mg, 55%). [α]<sub>D</sub> = -85.6, (c = 1.0, CHCl<sub>3</sub>); <sup>1</sup>H NMR (500 MHz, CDCl<sub>3</sub>), δ = 8.95 (1H, s), 8.80 (1H, s), 7.35–7.25 (5H, m), 5.69–5.66 (1H, t, <sup>3</sup>J = 7.9 Hz), 5.14–5.08 (2H, dd, <sup>2</sup>J = 12.3 Hz), 4.64–4.63 (1H, d, <sup>3</sup>J = 8.8 Hz), 4.43–4.41 (1H, m), 2.54 (1H, m), 1.87–1.53 (7H, m), 1.14–1.13 (3H, d, <sup>3</sup>J = 6.6 Hz), 0.92–0.76 (15H, m); <sup>13</sup>C NMR (150 MHz, CDCl<sub>3</sub>), δ = 173.1, 171.9, 169.0, 161.9, 161.4, 135.2, 128.7, 128.5, 128.3, 67.3, 60.5, 38.8, 38.7, 29.7, 28.0, 25.2, 24.9, 23.0, 22.8, 21.5, 21.4, 21.3, 19.2; IR (thin film): 2961.2, 2110.5, 1739.4, 1681.5, 1444.8, 1178.1; Exact mass calc'd for C<sub>26</sub>H<sub>37</sub>N<sub>5</sub>O<sub>6</sub> [M+Na]<sup>+</sup>: 538.2, found: 538.3.

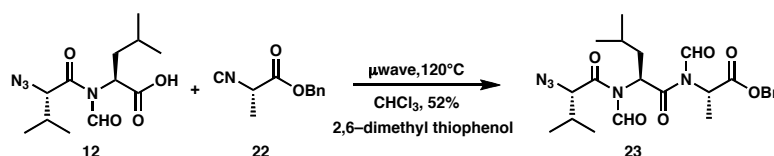

**(S)-benzyl 2-((S)-2-((S)-2-azido-N-formyl-3-methylbutanamido)-N-formyl-4-methylpentanamido)propanoate (23)** The procedure used was analogous to the preparation of **17** and used dipeptide **12** (57 mg, 0.2 mmol), alanine isonitrile **22** (113 mg, 0.6 mmol), CHCl<sub>3</sub> (2.0 mL) and 2,6-dimethyl thiophenol (27 μL, 0.2 mmol). Purification by flash chromatography in hexanes:ethyl acetate (20:1) gave the bis-N-formyl tripeptide **23** (49 mg, 52%). [α]<sub>D</sub> = -65.6, (c = 1.0, CHCl<sub>3</sub>); <sup>1</sup>H NMR



(500 MHz, CDCl<sub>3</sub>),  $\delta$  = 8.91 (1 H, s), 8.83 (1 H, s), 7.36–7.26 (5 H, m), 5.62–5.59 (1 H, dd,  $^3J$  = 5.45 Hz, 9.35 Hz), 5.18–5.08 (3 H, m, CH<sub>2</sub>Ph, Leu C <sup>$\alpha$</sup> H), 4.16–4.15 (1 H, d,  $^3J$  = 7.35 Hz, Val C <sup>$\alpha$</sup> H), 2.25–2.21 (1 H, m), 1.98–1.93 (1 H, m), 1.86–1.82 (1 H, m), 1.54–1.49 (3 H, d, Ala C <sup>$\beta$</sup> H<sub>3</sub>), 1.05–0.89 (12 H, m, 4CH<sub>3</sub>); <sup>13</sup>C NMR (125 MHz, CDCl<sub>3</sub>),  $\delta$  = 171.5, 171.0, 169.5, 161.6, 160.7, 135.3, 128.6, 128.4, 128.3, 67.8, 67.5, 50.6, 38.7, 30.7, 24.8, 22.9, 21.7, 19.5, 18.2, 15.0; IR (thin film): 2964.1, 2106.9, 1740.4, 1670.7, 1444.8, 1181.2; Exact mass calc'd for C<sub>23</sub>H<sub>31</sub>N<sub>5</sub>O<sub>6</sub> [M+Na]<sup>+</sup>: 496.2, found: 496.2.

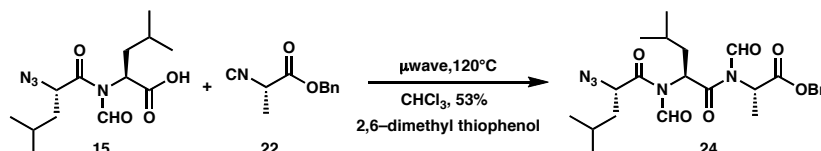

**(S)-benzyl 2-((S)-2-((S)-2-azido-N-formyl-4-methylpentanamido)-N-formyl-4-methylpentanamido)propanoate (24)** The procedure used was analogous to the preparation of **17** and used dipeptide **15** (60 mg, 0.2 mmol), alanine isonitrile **22** (113 mg, 0.6 mmol), CHCl<sub>3</sub> (2.0 mL) and 2,6-dimethyl thiophenol (27  $\mu$ L, 0.2 mmol). Purification by flash chromatography in hexanes:ethyl acetate (20:1) gave the bis-N-formyl tripeptide **24** (52 mg, 53%). [ $\alpha$ ]<sub>D</sub> = –55.6, (c = 1.0, CHCl<sub>3</sub>); <sup>1</sup>H NMR (600 MHz, CDCl<sub>3</sub>),  $\delta$  = 8.87 (1 H, s), 8.84 (1 H, s), 7.35–7.25 (5 H, m), 5.63–5.60 (1 H, dd,  $^3J$  = 5.52 Hz, 9.54 Hz, Ala C <sup>$\alpha$</sup> H), 5.16–5.09 (3 H, m, CH<sub>2</sub>Ph, Leu C <sup>$\alpha$</sup> H), 4.38–4.36 (1 H, d,  $^3J$  = 4.08 Hz, 9.48 Hz, Leu C <sup>$\alpha$</sup> H), 1.91–1.63 (5 H, m), 1.51 (4 H, m), 0.98–0.89 (12 H, m, 4CH<sub>3</sub>); <sup>13</sup>C NMR (125 MHz, CDCl<sub>3</sub>),  $\delta$  = 172.7, 171.1, 169.4, 161.6, 160.6, 135.2, 128.6, 128.4, 128.2, 67.5, 60.3, 50.5, 38.9, 38.6, 25.2, 24.8, 22.9, 22.8, 21.6, 21.4, 14.9; IR (thin film): 2958.3, 2112.6, 1732.7, 1680.7, 1455.0, 1180.2; Exact mass calc'd for C<sub>24</sub>H<sub>33</sub>N<sub>5</sub>O<sub>6</sub> [M+Na]<sup>+</sup>: 510.2, found: 510.3.

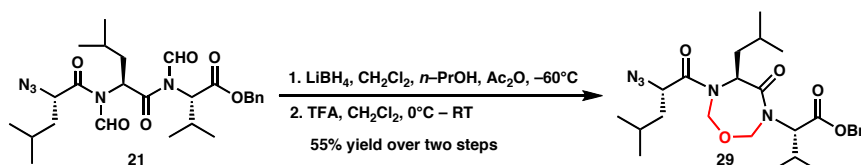

**(S)-benzyl 2-((S)-6-((S)-2-azido-4-methylpentanoyl)-5-isobutyl-4-oxo-1,3,6-oxadiazepan-3-yl)-3-methylbutanoate (29)** To a –60°C solution of tripeptide **21** (23 mg, 0.045 mmol) in CH<sub>2</sub>Cl<sub>2</sub> (5 mL) was added 1-propanol (0.25 mL) and acetic anhydride (10  $\mu$ L, 0.025 mmol). The resulting mixture was stirred at –60°C for 5 min, then a solution of LiBH<sub>4</sub> in THF (2.0 M) (0.27 mmol, 135  $\mu$ L) was added. After stirring for three hours at –60°C, TLC indicated disappearance of starting material. The reaction mixture was quenched with 0.2 M Trizma hydrochloride solution (10 mL) at –60°C, then slowly warmed to room temperature and stirred until the solution became clear. The resulting mixture was extracted with CH<sub>2</sub>Cl<sub>2</sub> (3  $\times$  10 mL), then the organic phase was washed with brine and dried over MgSO<sub>4</sub>. The resulting solution was evaporated at low pressure to give the crude diol, which was used in the following step without further purification. The crude diol was dissolved in dry CH<sub>2</sub>Cl<sub>2</sub> and treated with TFA (50  $\mu$ L, 0.36 mmol) at 0°C. The resulting mixture was warmed to room temperature slowly, then stirred at room temperature for 30 min. Finally, the solvent was evaporated at low pressure to give an oil. The crude residue was purified by flash chromatography using hexanes:ethyl acetate (15:1) as eluent to give the constrained tripeptide **29** (12 mg, 55%). [ $\alpha$ ]<sub>D</sub> = +39.6, (c = 1.0,

CHCl<sub>3</sub>); <sup>1</sup>H NMR (600 MHz, CDCl<sub>3</sub>, 50 °C), δ = 7.27–7.18 (5 H, m), 6.0–3.5 (9 H, m), 2.19–1.91 (7 H, m), 0.92–0.88 (18 H); IR (thin film): 2962.1, 2108.8.7, 1735.6, 1670.1, 1174.4; Exact mass calc'd for C<sub>26</sub>H<sub>39</sub>N<sub>5</sub>O<sub>5</sub> [M+Na]<sup>+</sup>: 524.3, found: 524.3.

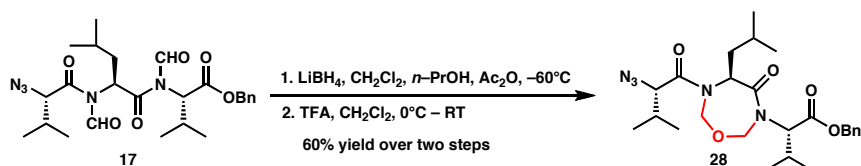

**(S)-benzyl 2-((S)-6-((S)-2-azido-3-methylbutanoyl)-5-isobutyl-4-oxo-1,3,6-oxadiazepan-3-yl)-3-methylbutanoate (28)** The procedure used was analogous to the preparation of **29** and used tripeptide **17** (35 mg, 0.07 mmol), LiBH<sub>4</sub> (0.21 mL, 0.42 mmol), CH<sub>2</sub>Cl<sub>2</sub> (10 mL), 1-propanol (0.5 mL), acetic anhydride (15 μL), and TFA (0.1 mL). Purification by flash chromatography in hexanes:ethyl acetate (20:1) gave the constrained tripeptide **28** (20.5 mg, 60%). [α]<sub>D</sub><sup>20</sup> = +61.9, (c = 1.0, CHCl<sub>3</sub>); <sup>1</sup>H NMR (600 MHz, DMSO, 54.1 °C), δ = 7.33–7.28 (5H, m), 5.09–4.98 (7H, m), 4.49 (1H, m), 3.97 (1H, m), 2.18–2.10 (2H, m), 1.84–1.73 (2H, m), 1.48 (1H, m), 0.94–0.83 (18H, m); IR (thin film): 2963.1, 2101.1, 1735.6, 1689.3, 1469.5, 1176.4; Exact mass calc'd for C<sub>25</sub>H<sub>37</sub>N<sub>5</sub>O<sub>5</sub> [M+H]<sup>+</sup>: 488.3, found: 488.4.

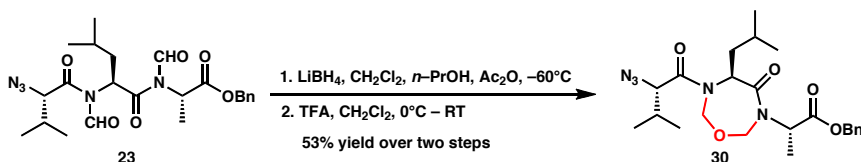

**(S)-benzyl 2-((S)-6-((S)-2-azido-3-methylbutanoyl)-5-isobutyl-4-oxo-1,3,6-oxadiazepan-3-yl)propanoate (30)** The procedure used was analogous to the preparation of **29** and used tripeptide **23** (33 mg, 0.07 mmol), LiBH<sub>4</sub> (0.21 mL, 0.42 mmol), CH<sub>2</sub>Cl<sub>2</sub> (10 mL), 1-propanol (0.5 mL), acetic anhydride (15 μL), and TFA (0.1 mL). Purification by flash chromatography in hexanes:ethyl acetate (20:1) gave the constrained tripeptide **30** (17 mg, 53%). [α]<sub>D</sub><sup>20</sup> = +45.5, (c = 1.0, CHCl<sub>3</sub>); <sup>1</sup>H NMR (600 MHz, CDCl<sub>3</sub>, 50 °C), δ = 7.29–7.25 (5H, m), 5.84–4.37 (8H, m), 3.48–3.36 (1H, m), 2.29–1.18 (7H, m), 0.89–0.83 (12H, m); IR (thin film): 2962.1, 2102.0, 1741.4, 1678.7, 1466.5, 1186.9; Exact mass calc'd for C<sub>23</sub>H<sub>33</sub>N<sub>5</sub>O<sub>5</sub> [M+Na]<sup>+</sup>: 482.2, found: 482.1.

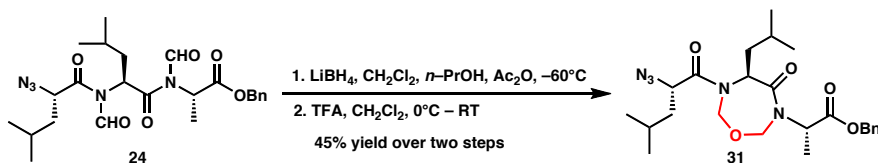

**(S)-benzyl 2-((S)-6-((S)-2-azido-4-methylpentanoyl)-5-isobutyl-4-oxo-1,3,6-oxadiazepan-3-yl)propanoate (31)** The procedure used was analogous to the preparation of **29** and used tripeptide **24** (34 mg, 0.07 mmol), LiBH<sub>4</sub> (0.21 mL, 0.42 mmol), CH<sub>2</sub>Cl<sub>2</sub> (10 mL), 1-propanol (0.5 mL), acetic anhydride (15 μL), and TFA (0.1 mL). Purification by flash chromatography in hexanes:ethyl acetate

(20:1) gave the constrained tripeptide **31** (15 mg, 45%).  $[\alpha]_D^{25} = +34.9$  (c = 1.0, CHCl<sub>3</sub>); <sup>1</sup>H NMR (600 MHz, CDCl<sub>3</sub>, 50 °C), δ = 7.30–7.25 (5H, m), 5.74–3.84 (9H, m), 2.10–1.36 (9H, m), 0.96–0.87 (12H, m); IR (thin film): 2960.2, 2112.6, 1740.4, 1673.9, 1467.6, 1190.8; Exact mass calc'd for C<sub>24</sub>H<sub>35</sub>N<sub>5</sub>O<sub>5</sub> [M+Na]<sup>+</sup>: 496.3, found: 496.2.

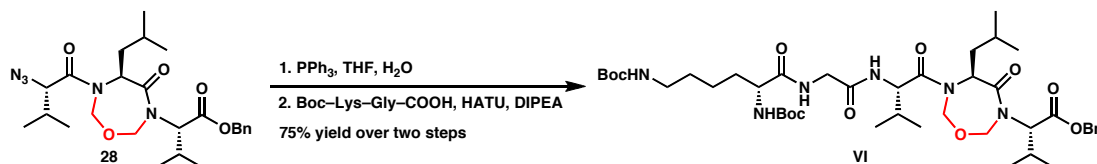

**(S)-benzyl 2-((S)-6-((10R,16S)-10-(tert-butoxycarbonylamino)-2,2,17-trimethyl-4,11,14-trioxo-3-oxa-5,12,15-triazaoctadecanecarbonyl)-5-isobutyl-4-oxo-1,3,6-oxadiazepan-3-yl)-3-methylbutanoate (VI)** To a solution of **28** (25 mg, 0.05 mmol) in a mixture of THF and H<sub>2</sub>O (6.0 mL, 5:1) was added triphenylphosphine (20 mg, 0.075 mmol). The reaction mixture was stirred at room temperature overnight, then evaporated at low pressure. The crude residue was dissolved in DMF (2.0 mL), and Boc-Lys-Gly-COOH (40 mg, 0.1 mmol) was added. The resulting mixture was treated with HATU (38 mg, 0.1 mmol) and DIPEA (26 μL, 0.15 mmol). After 30 min, LCMS analysis of the reaction mixture indicated disappearance of the starting material. The reaction mixture was purified by reverse phase HPLC to give the product **VI** (31 mg, 75%). Exact mass calc'd for C<sub>43</sub>H<sub>70</sub>N<sub>6</sub>O<sub>11</sub> [M+H]<sup>+</sup>: 847.51, found: 847.91.

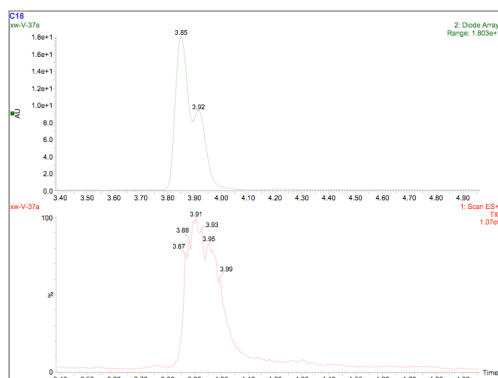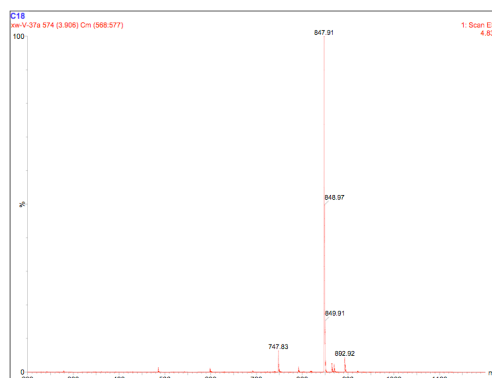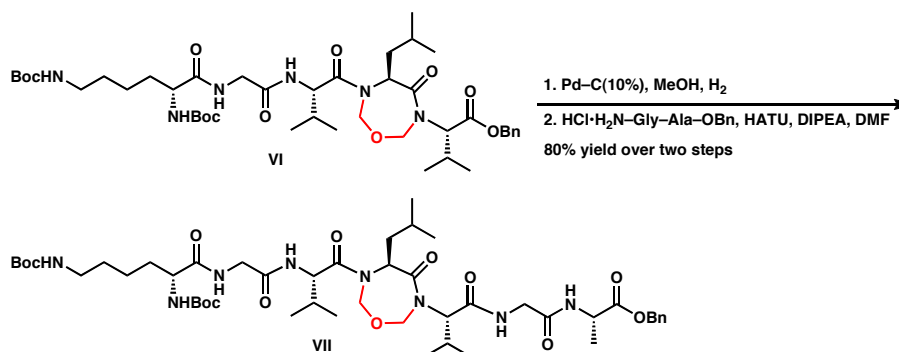

**(S)-benzyl 2-(2-((S)-2-((S)-6-((10R,16S)-10-(tert-butoxycarbonylamino)-2,2,17-trimethyl-4,11,14-trioxo-3-oxa-5,12,15-triazaoctadecanecarbonyl)-5-isobutyl-4-oxo-1,3,6-oxadiazepan-3-yl)-3-methylbutanamido)acetamido)propanoate (VII)** To a solution of compound **VI** (31 mg, 0.037 mmol)

in MeOH (5 mL) was added Pd–C(10%) (20 mg) and the resulting mixture was stirred under an atmosphere of hydrogen overnight. The solution was passed through a filter (0.45 μm). The resulting solution was evaporated at low pressure to give the crude deprotected pentapeptide. The residue was dissolved in DMF (2.0 mL), and HCl•H<sub>2</sub>N–Gly–Ala–OBn (20 mg, 0.075 mmol) was added at –10°C. The resulting mixture was treated with HATU (38 mg, 0.1 mmol) and DIPEA (26 μL, 0.15 mmol) at that temperature. After 30 min, LCMS analysis of the reaction mixture indicated disappearance of the starting material. The reaction mixture was purified by reverse phase HPLC to give the product **VII** (29 mg, 80%). Exact mass calc'd for C<sub>48</sub>H<sub>78</sub>N<sub>8</sub>O<sub>13</sub> [M+H]<sup>+</sup>: 975.57, found: 976.0.

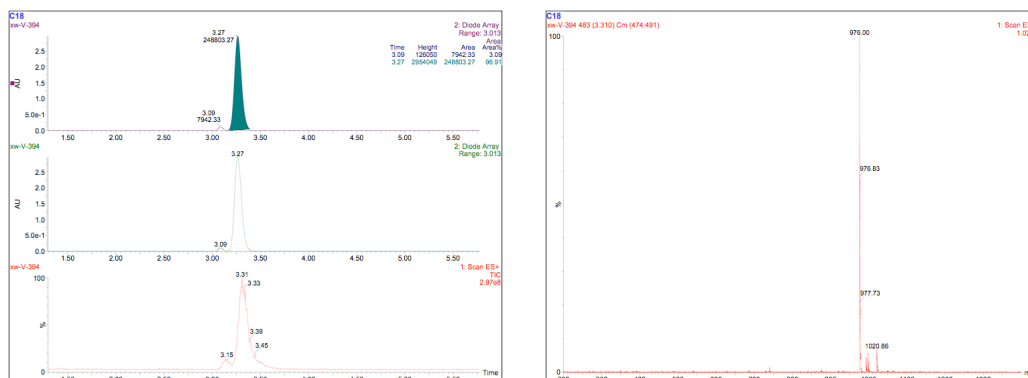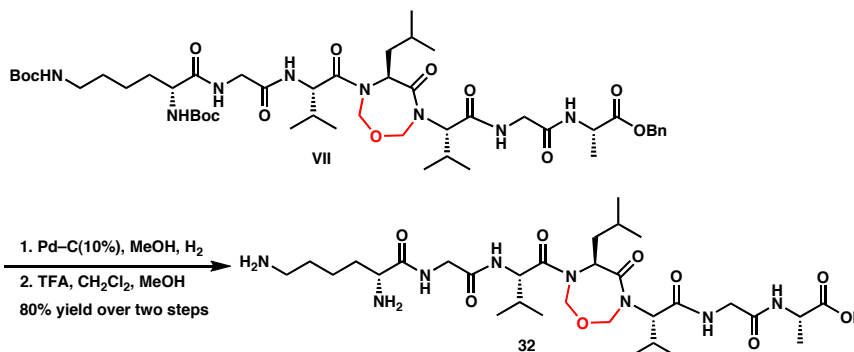

**(S)-2-(2-((S)-2-((S)-6-((6R,12S)-6-(4-aminobutyl)-2,2,13-trimethyl-4,7,10-trioxo-3-oxa-5,8,11-triazatetradecanecarbonyl)-5-isobutyl-4-oxo-1,3,6-oxadiazepan-3-yl)-3-**

**methylbutanamido)acetamido)propanoic acid (32)** To a solution of compound **VII** (15 mg, 0.015 mmol) in MeOH (5 mL) was added Pd–C(10%) (20 mg) and the resulting mixture was stirred under an atmosphere of hydrogen overnight. The solution was passed through a filter (0.45 μm). The resulting solution was evaporated at low pressure to give the crude deprotected pentapeptide. The residue was dissolved in CH<sub>2</sub>Cl<sub>2</sub> (1.0 mL) and treated with TFA (1.0 mL) at –10°C. The resulting mixture was stirred for two hours at that temperature. LCMS analysis of the reaction mixture indicated disappearance of the starting material. The reaction mixture was purified by reverse phase HPLC to give the product **32** (8.3 mg, 80%). [α]<sub>D</sub> = +51.9, (c = 1.0, MeOH); <sup>1</sup>H NMR (600 MHz, D<sub>2</sub>O, 4 °C) δ 5.79 (d, <sup>3</sup>J = 12.2 Hz, 1H, one of NCH<sub>2</sub>O), 5.37 (d, <sup>3</sup>J = 13.5 Hz, 1H, one of NCH<sub>2</sub>O), 5.20 (d, <sup>3</sup>J = 13.5 Hz, 1H, one of NCH<sub>2</sub>O), 4.99 (d, <sup>3</sup>J = 12.5 Hz, 1H, one of NCH<sub>2</sub>O), 4.92 (d, <sup>3</sup>J = 4.8 Hz, 1H, Val-3 C<sup>α</sup>H), 4.46 (broad dd, <sup>3</sup>J = 8.0, 4.4 Hz, 1H, Leu-4 C<sup>α</sup>H), 4.36 (d, <sup>3</sup>J = 10.8 Hz, 1H, Val-5 C<sup>α</sup>H), 4.24 (q, <sup>3</sup>J = 6.9 Hz, 1H, Ala-7 C<sup>α</sup>H), 4.12 (d, <sup>3</sup>J = 16.9 Hz, 1H, Gly-2 C<sup>α</sup>H), 4.04 (t, <sup>3</sup>J = 6.4 Hz, 1H, Lys-1 C<sup>α</sup>H), 3.89 (s, 2H, Gly-6 C<sup>α</sup>H<sub>2</sub>), 3.84 (d, <sup>3</sup>J = 16.9 Hz, 1H, Gly-2 C<sup>α</sup>H), 3.01 (t, <sup>3</sup>J = 7.1 Hz, 2H, Lys-1 C<sup>ε</sup>H<sub>2</sub>),

2.24–2.08 (m, 3H, Val-3 C<sup>β</sup>H, Leu-4 C<sup>β</sup>H, Val-5 C<sup>β</sup>H), 2.00–1.86 (m, 2H, Lys-1 C<sup>β</sup>H<sub>2</sub>), 1.81–1.67 (m, 2H, Lys-1 C<sup>δ</sup>H<sub>2</sub>), 1.67–1.59 (m, 1H, Leu-4 C<sup>β</sup>H), 1.59–1.43 (m, 3H, Lys-1 C<sup>γ</sup>H<sub>2</sub>, Leu-4 C<sup>γ</sup>H), 1.37 (d, <sup>3</sup>J = 7.1 Hz, 3H, Ala-7 C<sup>β</sup>H<sub>3</sub>), 1.04–0.81 (m, 15H, Val-3 C<sup>γ</sup>H<sub>3</sub> × 2, Leu-4 C<sup>δ</sup>H<sub>3</sub> × 2, Val-5 C<sup>γ</sup>H<sub>3</sub>), 0.78 (d, <sup>3</sup>J = 6.0 Hz, 3H, Val-5 C<sup>γ</sup>H<sub>3</sub>); <sup>13</sup>C NMR (150 MHz, D<sub>2</sub>O, 4 °C) δ 181.4, 180.3, 178.6, 176.3, 173.0, 172.8, 172.4, 86.6, 78.8, 66.3, 64.8, 57.6, 55.6, 52.8, 44.8, 44.6, 41.6, 38.8, 34.2, 33.1, 30.2, 29.1, 27.0, 25.2, 23.9, 23.4, 21.4, 21.3, 21.2, 19.6, 19.0; Exact mass calc'd for C<sub>31</sub>H<sub>56</sub>N<sub>8</sub>O<sub>9</sub> [M+H]<sup>+</sup>: 685.42, found: 685.69.

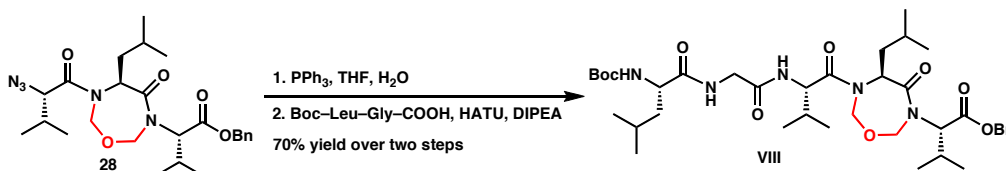

**(S)-benzyl 2-((S)-5-isobutyl-6-((6S,12S)-6-isobutyl-2,2,13-trimethyl-4,7,10-trioxo-3-oxa-5,8,11-triazatetradecanecarbonyl)-4-oxo-1,3,6-oxadiazepan-3-yl)-3-methylbutanoate (VIII)** The procedure used was analogous to the preparation of **VI** and used tripeptide **28** (11 mg, 0.023 mmol), triphenylphosphine (9 mg, 0.034 mmol), Boc-Leu-Gly-COOH (13 mg, 0.045 mmol), HATU (17 mg, 0.045 mmol), and DIPEA (10 μL, 0.057 mmol). Reverse phase HPLC purification gave the constrained peptapeptide **VIII** (11.7 mg, 70%). Exact mass calc'd for C<sub>38</sub>H<sub>61</sub>N<sub>5</sub>O<sub>9</sub> [M+H]<sup>+</sup>: 732.45, found: 732.61.

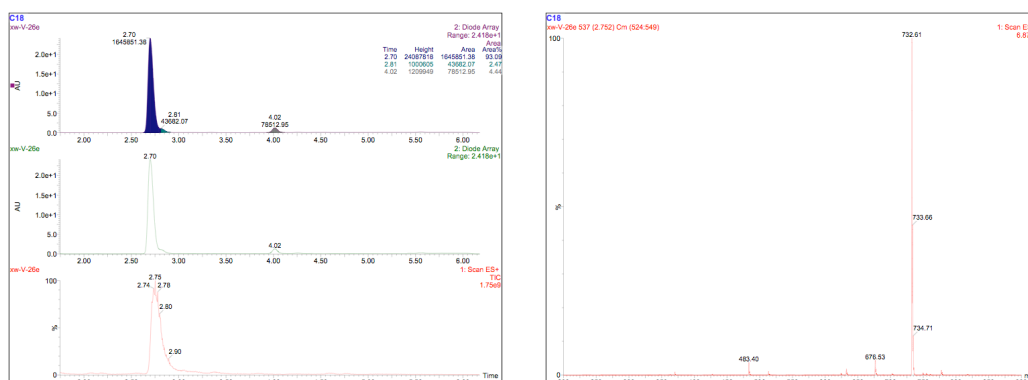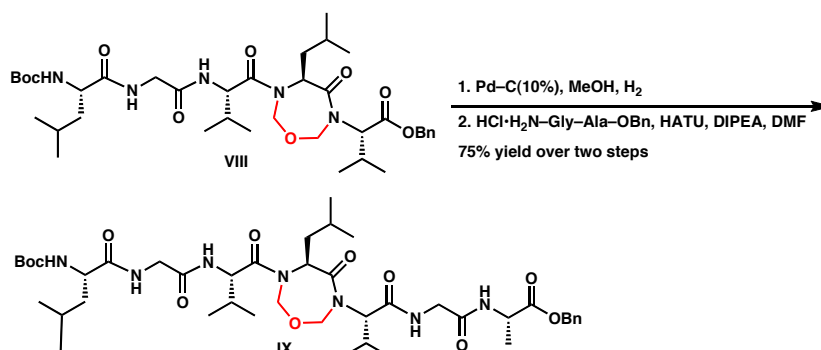

**(S)-benzyl 2-(2-((S)-2-((S)-5-isobutyl-6-((6S,12S)-6-isobutyl-2,2,13-trimethyl-4,7,10-trioxo-3-oxa-5,8,11-triazatetradecanecarbonyl)-4-oxo-1,3,6-oxadiazepan-3-yl)-3-methylbutanamido)acetamido)propanoate (IX)** The procedure used was analogous to the preparation of **VII** and used peptapeptide **VIII** (7.3 mg, 0.01 mmol), Pd-C (10%) (20 mg), HCl·H<sub>2</sub>N-Gly-Ala-OBn (3.3 mg, 0.012 mmol), HATU (5.7 mg, 0.015 mmol), and DIPEA (4.0 μL, 0.025 mmol).

Reverse phase HPLC purification gave the constrained pentapeptide **IX** (6.4 mg, 75%). Exact mass calc'd for  $C_{43}H_{69}N_7O_{11}$   $[M+H]^+$ : 860.51, found: 860.73.

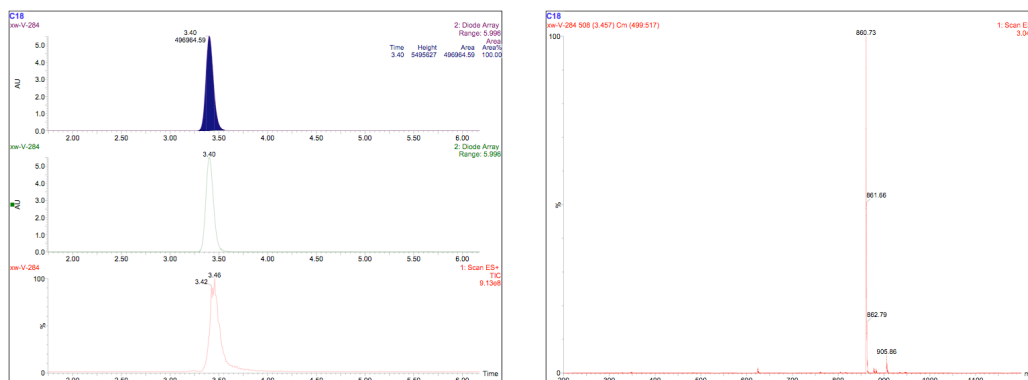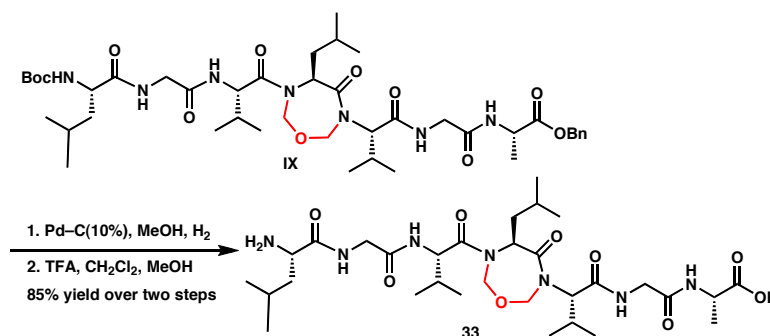

**(S)-2-(2-((S)-2-((S)-6-((S)-2-(2-((S)-2-amino-4-methylpentanamido)acetamido)-3-methylbutanoyl)-5-isobutyl-4-oxo-1,3,6-oxadiazepan-3-yl)-3-methylbutanamido)acetamido)propanoic acid (**33**)**

The procedure used was analogous to the preparation of **32** and used heptapeptide **IX** (6 mg,  $7\mu\text{mol}$ ), Pd-C (10%) (10 mg), MeOH (5 mL),  $\text{CH}_2\text{Cl}_2$  (1.2 mL) and TFA (0.4 mL). Reverse phase HPLC purification gave the constrained heptapeptide **33** (4.0 mg, 85%).  $[\alpha]_D^{25} = +41.8$  (c = 1.0, MeOH);  $^1\text{H}$  NMR (600 MHz,  $\text{D}_2\text{O}$ , 4 °C)  $\delta$  5.78 (d,  $^3J = 12.2$  Hz, 1H, one of  $\text{NCH}_2\text{O}$ ), 5.37 (d,  $^3J = 13.5$  Hz, 1H, one of  $\text{NCH}_2\text{O}$ ), 5.20 (d,  $^3J = 13.2$  Hz, 1H, one of  $\text{NCH}_2\text{O}$ ), 4.99 (d,  $^3J = 12.2$  Hz, 1H, one of  $\text{NCH}_2\text{O}$ ), 4.92 (d,  $^3J = 5.1$  Hz, 1H, Val-3  $\text{C}^\alpha\text{H}$ ), 4.46 (broad dd,  $^3J = 8.3, 5.1$  Hz, 1H, Leu-4  $\text{C}^\alpha\text{H}$ ), 4.35 (d,  $^3J = 10.7$  Hz, 1H, Val-5  $\text{C}^\alpha\text{H}$ ), 4.22 (q,  $^3J = 6.9$  Hz, 1H, Ala-7  $\text{C}^\alpha\text{H}$ ), 4.09 (d,  $^3J = 16.7$  Hz, 1H, Gly-2  $\text{C}^\alpha\text{H}$ ), 4.05 (t,  $^3J = 7.0$  Hz, 2H, Leu-1  $\text{C}^\alpha\text{H}$ ), 3.89 (s, 2H, Gly-6  $\text{C}^\alpha\text{H}_2$ ), 3.85 (d,  $^3J = 16.6$  Hz, 1H, Gly-2  $\text{C}^\alpha\text{H}$ ), 2.21–2.08 (m, 3H, Val-3  $\text{C}^\beta\text{H}$ , Leu-4  $\text{C}^\beta\text{H}$ , Val-5  $\text{C}^\beta\text{H}$ ), 1.82–1.67 (m, 3H, Leu-1  $\text{C}^\beta\text{H}_2$ , Leu-1  $\text{C}^\gamma\text{H}$ ), 1.66–1.58 (m, 1H, Leu-4  $\text{C}^\beta\text{H}$ ), 1.58–1.49 (m, 1H, Leu-4  $\text{C}^\gamma\text{H}$ ), 1.36 (d,  $^3J = 7.2$  Hz, 3H, Ala-7  $\text{C}^\beta\text{H}_3$ ), 1.05–0.81 (m, 21H, Leu-1  $\text{C}^\delta\text{H}_3 \times 2$ , Val-3  $\text{C}^\gamma\text{H}_3 \times 2$ , Leu-4  $\text{C}^\delta\text{H}_3 \times 2$ , Val-5  $\text{C}^\gamma\text{H}_3$ ), 0.78 (d,  $^3J = 6.1$  Hz, 3H, Val-5  $\text{C}^\gamma\text{H}_3$ );  $^{13}\text{C}$  NMR (150 MHz,  $\text{D}_2\text{O}$ , 4 °C)  $\delta$  181.3, 180.4, 178.6, 176.4, 173.6, 173.0, 172.5, 86.6, 78.8, 66.4, 64.8, 57.7, 54.4, 52.8, 44.8, 44.6, 42.6, 38.8, 34.2, 30.2, 27.0, 26.5, 25.2, 24.4, 23.7, 23.4, 21.5, 21.3, 21.2, 19.6, 19.0; Exact mass calc'd for  $C_{31}H_{55}N_7O_9$   $[M+H]^+$ : 670.41, found: 670.56.

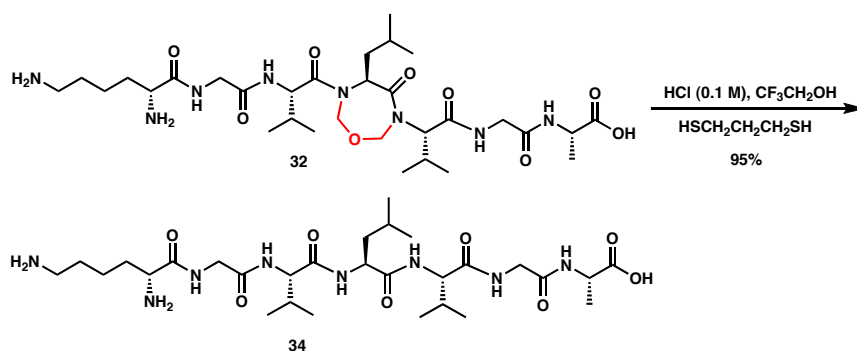

To a solution of constrained heptapeptide **32** (5 mg, 7.31  $\mu\text{mol}$ ) in  $\text{CF}_3\text{CH}_2\text{OH}$  (2 mL) was added 1,3-propanedithiol (0.1 mL) and 0.1 M HCl (0.2 mL). The resulting mixture was stirred at room temperature for two hours. LCMS analysis of the reaction mixture indicated disappearance of the starting material. Reverse phase HPLC purification gave the linear heptapeptide **34** (4.5 mg, 95%).  $^1\text{H}$  NMR (600 MHz,  $\text{D}_2\text{O}$ , 4  $^\circ\text{C}$ )  $\delta$  4.46–4.40 (m, 1H, Leu-4  $\text{C}^\alpha\text{H}$ ), 4.27 (q,  $^3J = 7.3$  Hz, 1H, Ala-7  $\text{C}^\alpha\text{H}$ ), 4.11 (d,  $^3J = 7.3$  Hz, 1H, Val-3  $\text{C}^\alpha\text{H}$ ), 4.10–4.02 (m, 3H, Gly-2  $\text{C}^\alpha\text{H}$ , Val-5  $\text{C}^\alpha\text{H}$ , Lys-1  $\text{C}^\alpha\text{H}$ ), 3.99 (d,  $^3J = 16.8$  Hz, 1H, Gly-2  $\text{C}^\beta\text{H}$ ), 3.93 (s, 2H, Gly-6  $\text{C}^\alpha\text{H}_2$ ), 3.00 (t,  $^3J = 7.6$  Hz, 2H, Lys-1  $\text{C}^\epsilon\text{H}_2$ ), 2.10–2.01 (m, 2H, Val-3  $\text{C}^\beta\text{H}$ , Val-5  $\text{C}^\beta\text{H}$ ), 2.00–1.87 (m, 2H, Lys-1  $\text{C}^\beta\text{H}_2$ ), 1.76–1.68 (m, 2H, Lys-1  $\text{C}^\delta\text{H}_2$ ), 1.67–1.53 (m, 3H, Leu-4  $\text{C}^\beta\text{H}_2$ , Leu-4  $\text{C}^\gamma\text{H}$ ), 1.53–1.43 (m, 2H, Lys-1  $\text{C}^\gamma\text{H}_2$ ), 1.39 (d,  $^3J = 7.3$  Hz, 3H, Ala-7  $\text{C}^\beta\text{H}_3$ ), 1.01–0.89 (m, 15H, Val-5  $\text{C}^\gamma\text{H}_3 \times 2$ , Val-3  $\text{C}^\gamma\text{H}_3 \times 2$ , Leu-4  $\text{C}^\delta\text{H}_3$ ), 0.87 (d,  $^3J = 5.6$  Hz, 3H, Leu-4  $\text{C}^\delta\text{H}_3$ );  $^{13}\text{C}$  NMR (150 MHz,  $\text{D}_2\text{O}$ , 4  $^\circ\text{C}$ )  $\delta$  180.8, 177.1, 176.6, 176.2, 173.5, 173.2, 172.9, 62.6, 62.2, 55.6, 54.8, 52.4, 44.9, 44.7, 42.3, 41.6, 33.0, 32.9, 32.7, 29.1, 27.0, 24.7, 23.9, 23.6, 21.1, 21.0, 20.8, 20.3, 19.4; Exact mass calc'd for  $\text{C}_{29}\text{H}_{54}\text{N}_8\text{O}_8$   $[\text{M}+\text{H}]^+$ : 643.41, found: 643.57.

**Rationale for Formation of 18.** The structure of **18** was confirmed by  $^1\text{H}$  NMR and MS evidence. A plausible mechanism for its formation might involve acyl transfer from the *N*-formyl nitrogen to the formimidate nitrogen, with expulsion of the formyl-Leu residue in the form of an oxazolone:

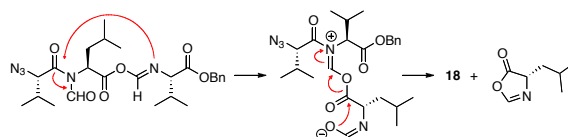

#### Notes on Substrate Scope.

1. Although the 2+1 coupling afforded synthetically useful yields of bis-*N*-formyl tripeptides containing bulky amino acids such as Leu and Val, we noted a precipitous decline in efficiency (yields < 5%) with couplings involving isoleucine-containing substrates.
2. When tripeptides containing glycine at any position were subjected to reduction conditions (cf. **25**→**26**, Table 3), decomposition into multiple species was observed. Analysis of the mixture by MS indicated the presence of side products derived from deformylation as well as cleavage of the peptide chain, among others. Expanding the scope of this sequence is an area of active investigation in our laboratory.

Proton24 . \* wux1 xw-V-12a (1) CDCl3 24.0C March\_06,2009\_18:29 DRX 500MHz zg30 1H . \*

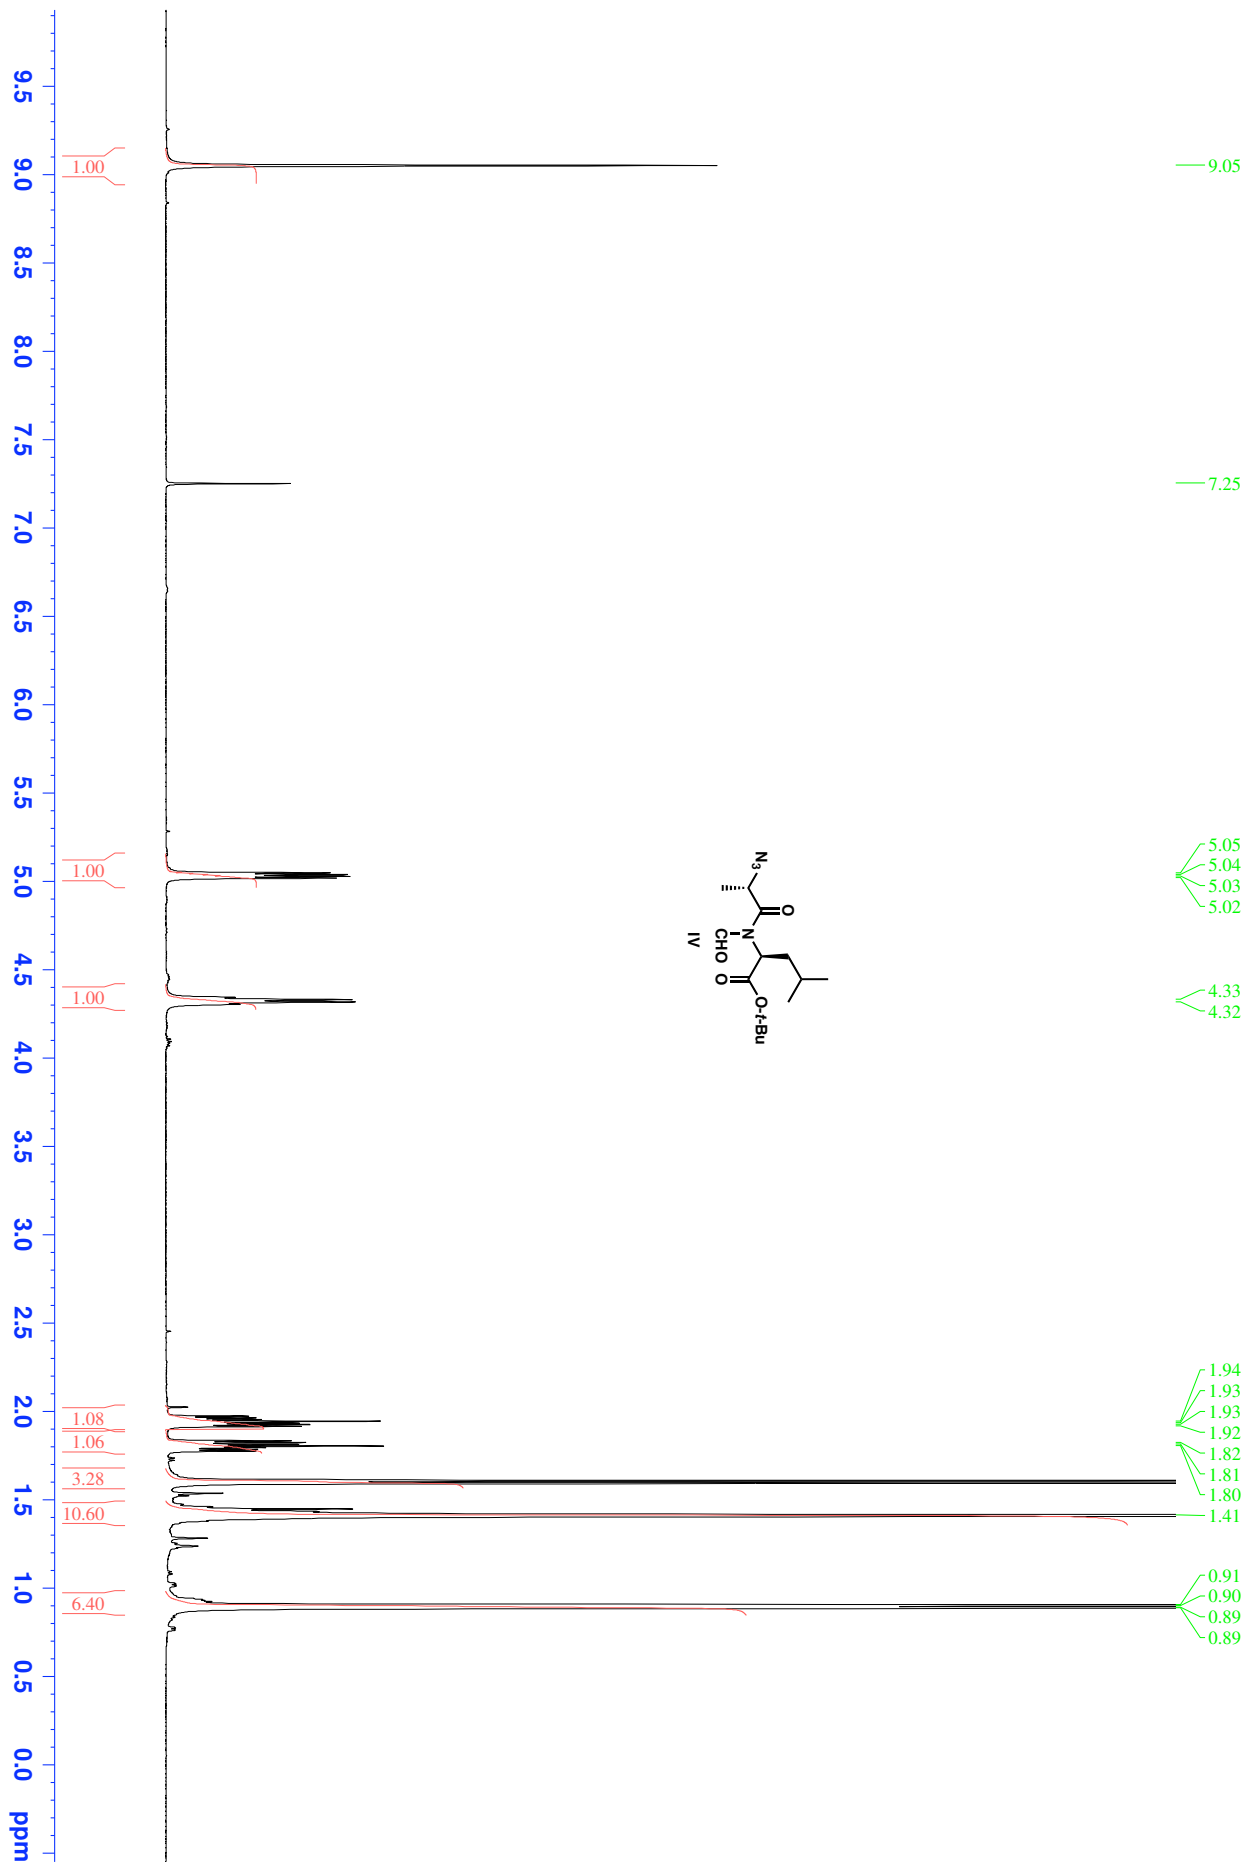



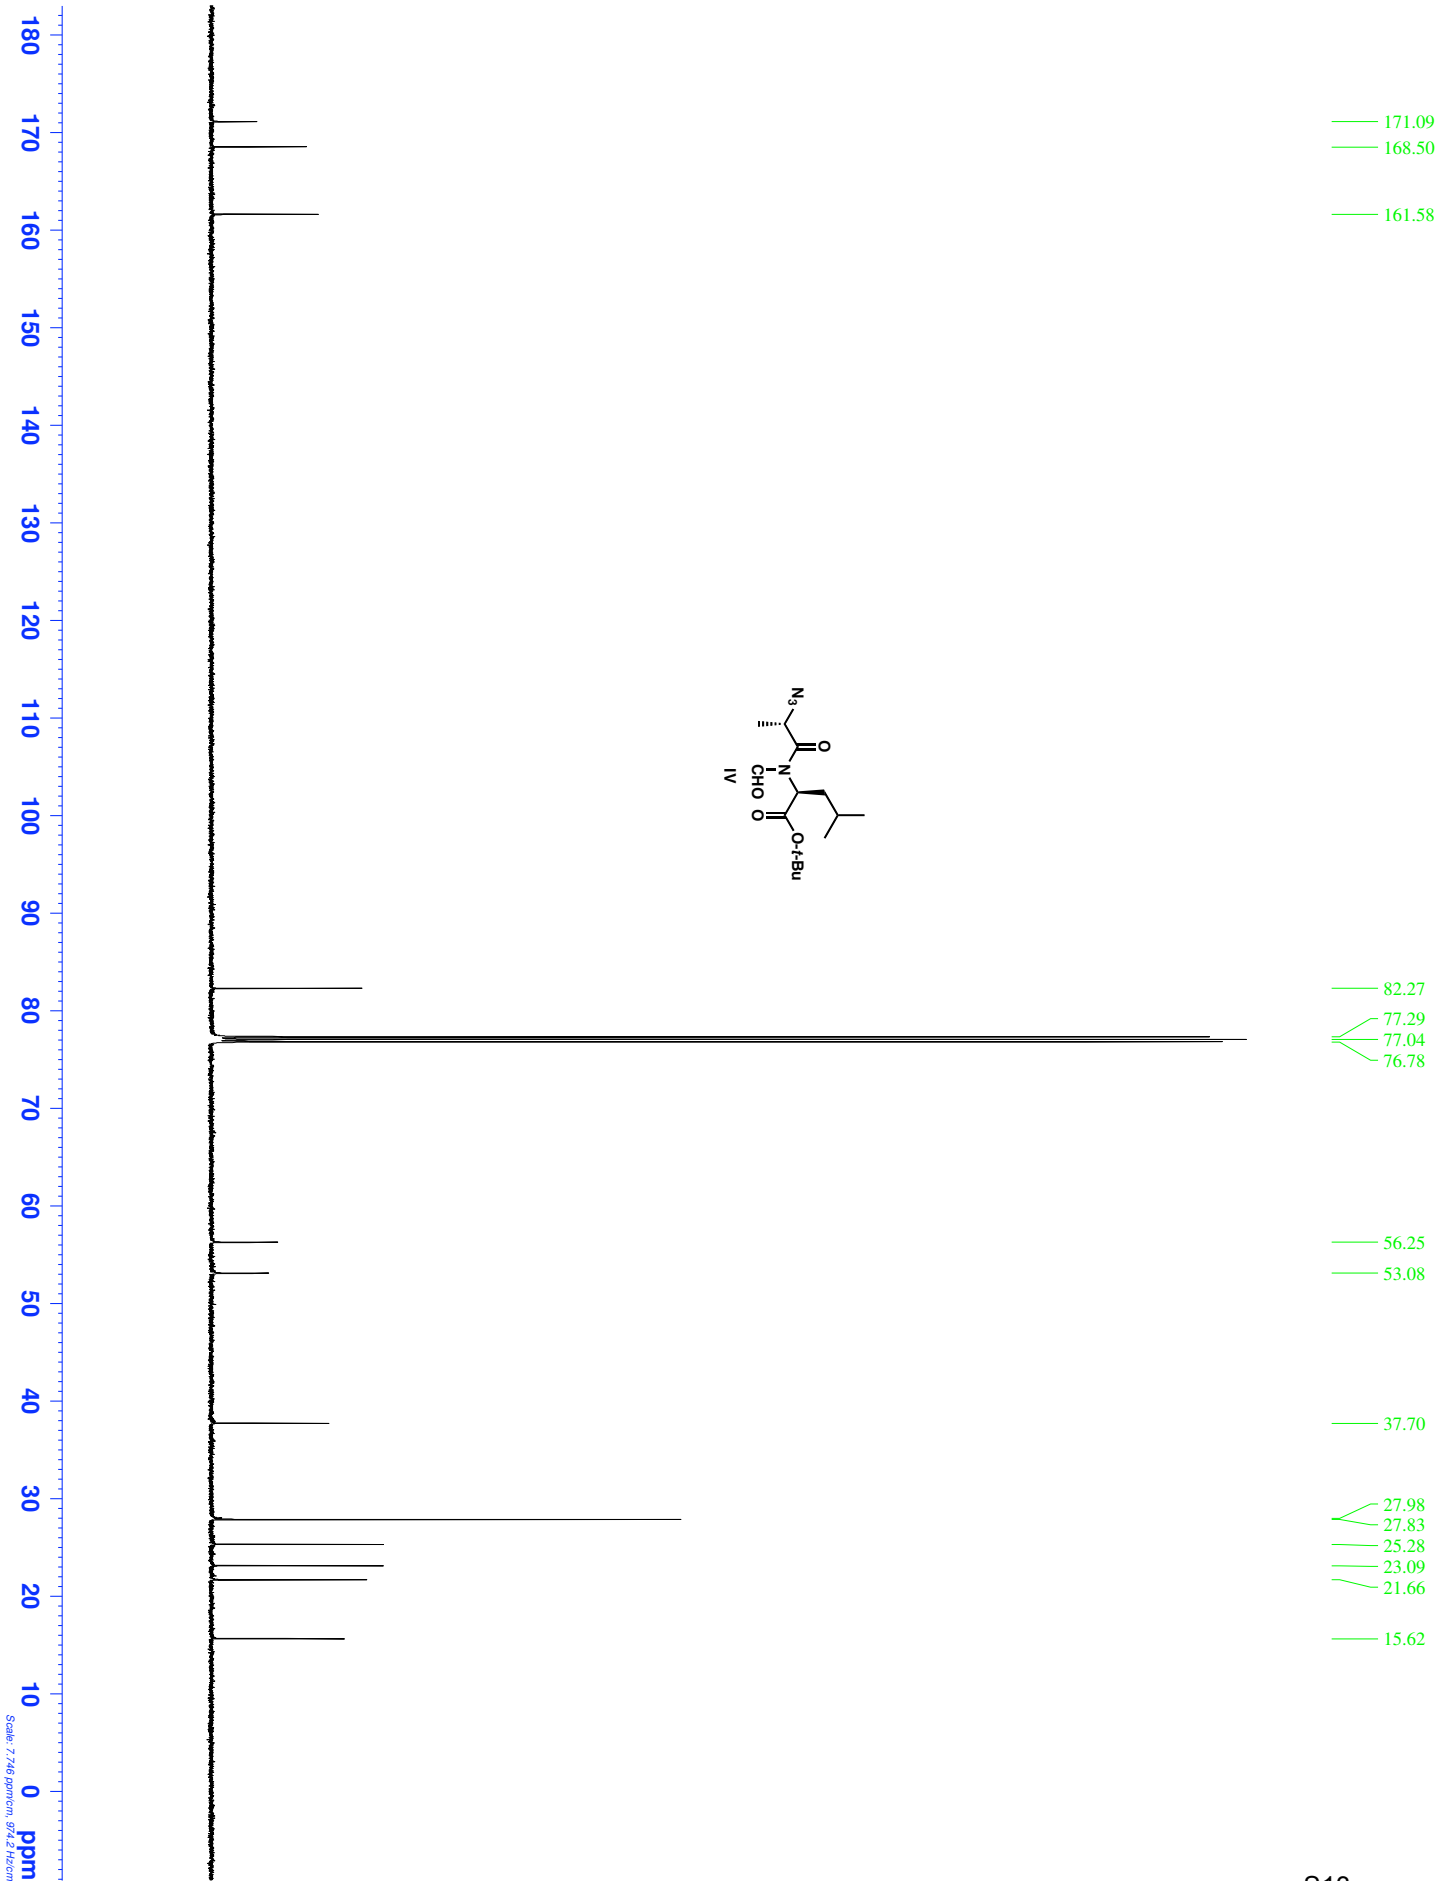

Proton24 . \* wux1 xw-V-45H (1 1) CDCl3 24.0C July\_12,2010\_11:24:20 DRX 500MHz zg30 1H \*

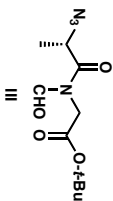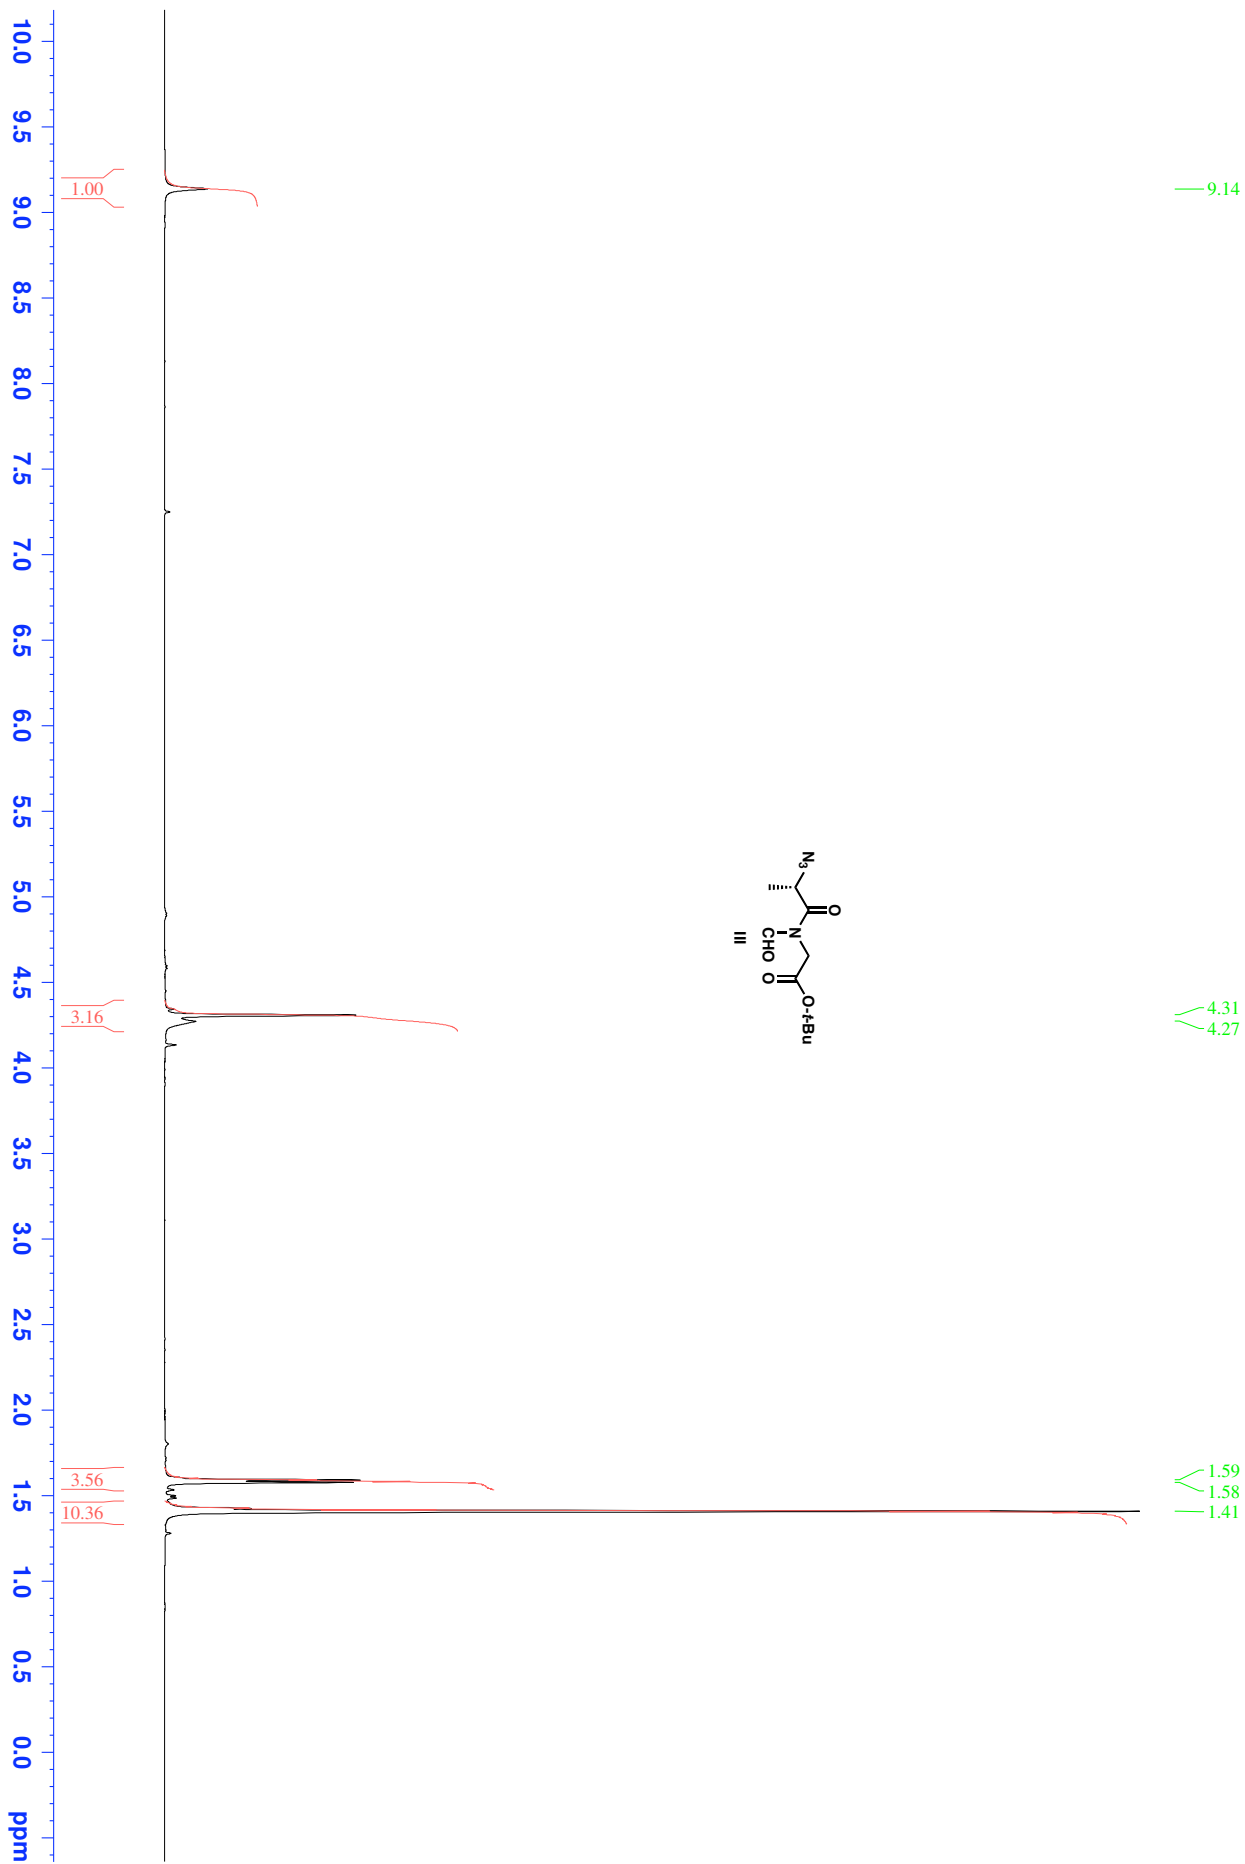

Carbon . \* wux1 xw-V-45C13 (1 1) CDCl3 24.0C July\_12,2010\_11:28:56 DRX 500MHz zqpg30 13C; 1H O2=4.000 \*

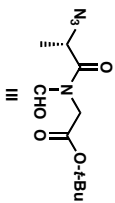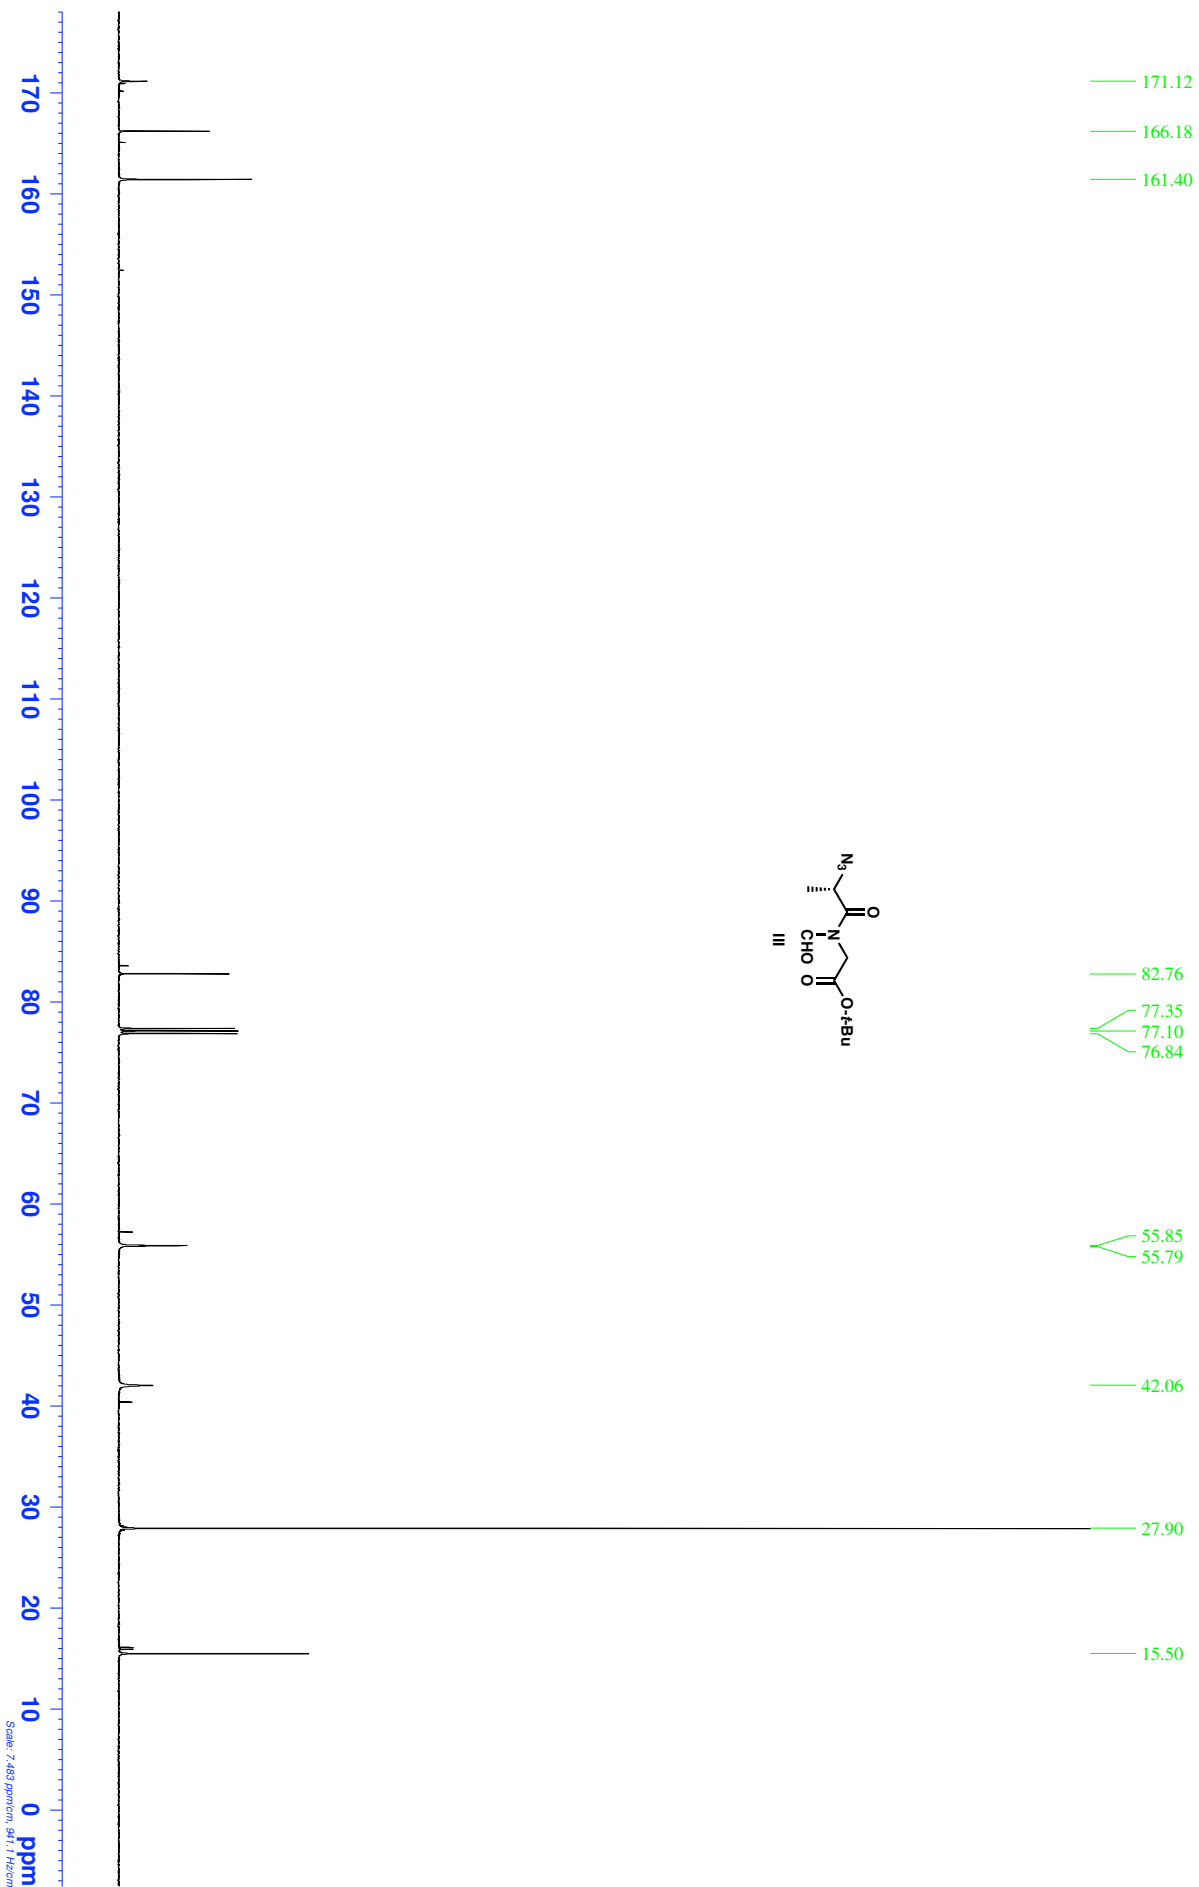

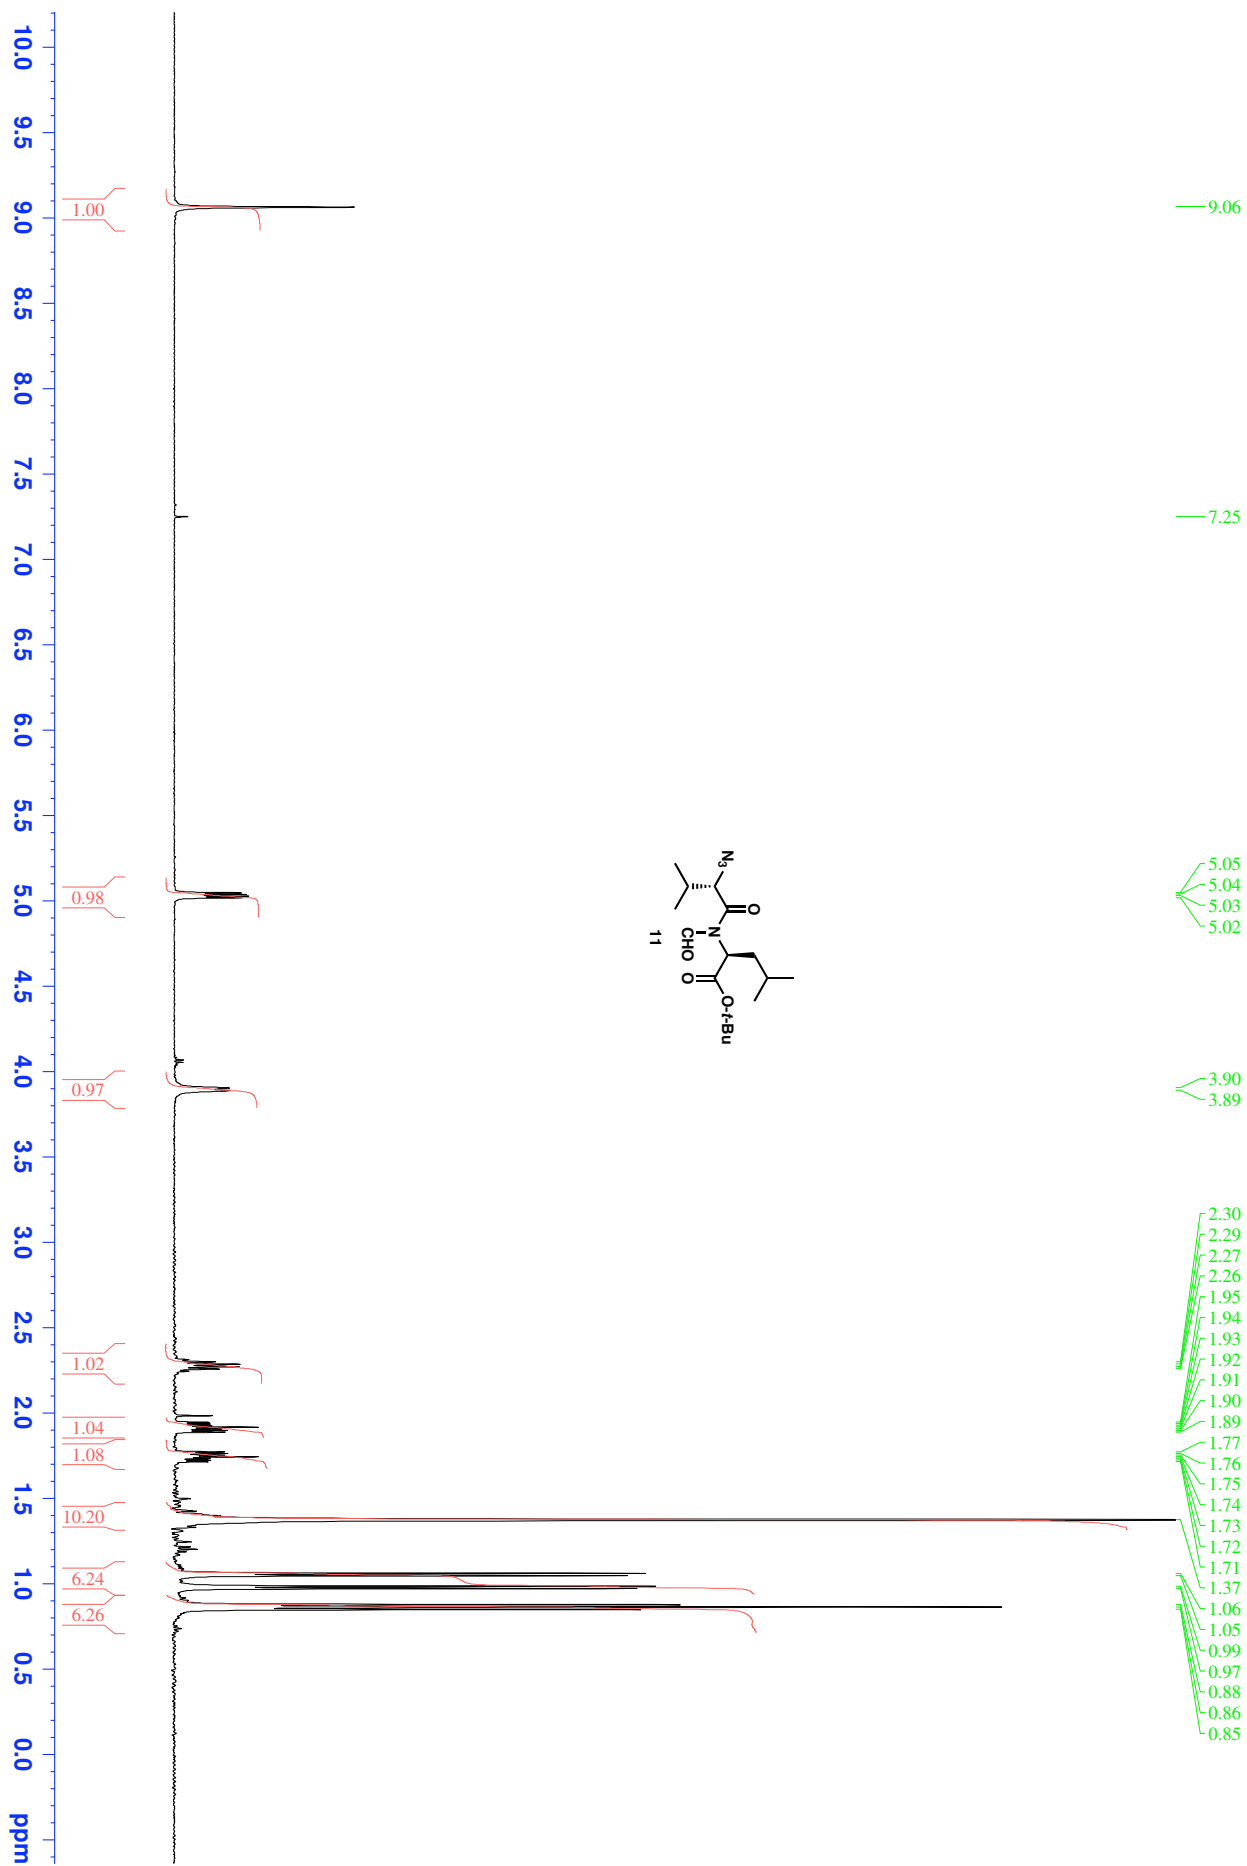

Carbon . \* wux1 xw-V-22C13 (1 1) CDCl3 24.0C February\_10,2010\_23:32:51 DRX 500MHz zgpg30 13C; 1H O2=4.000 \*

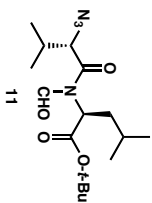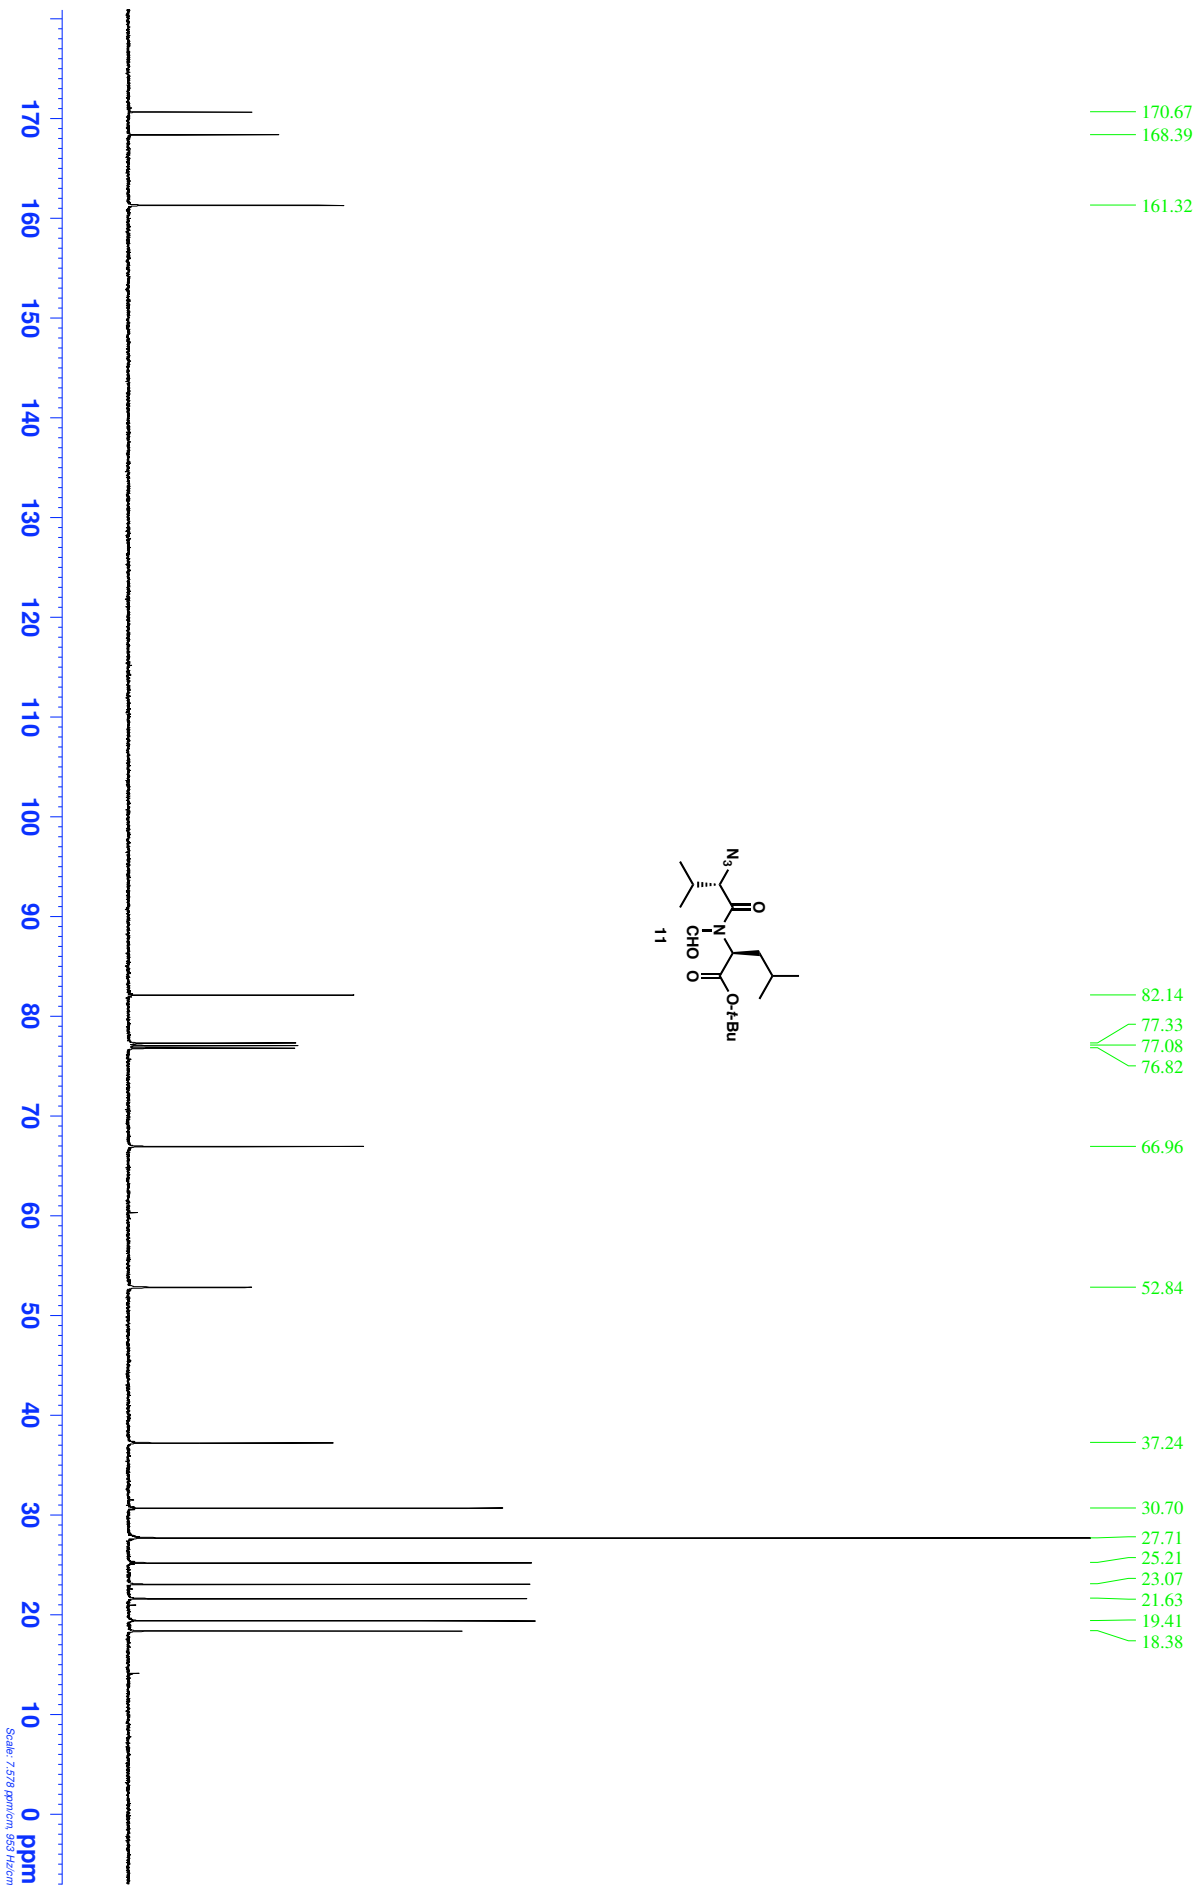

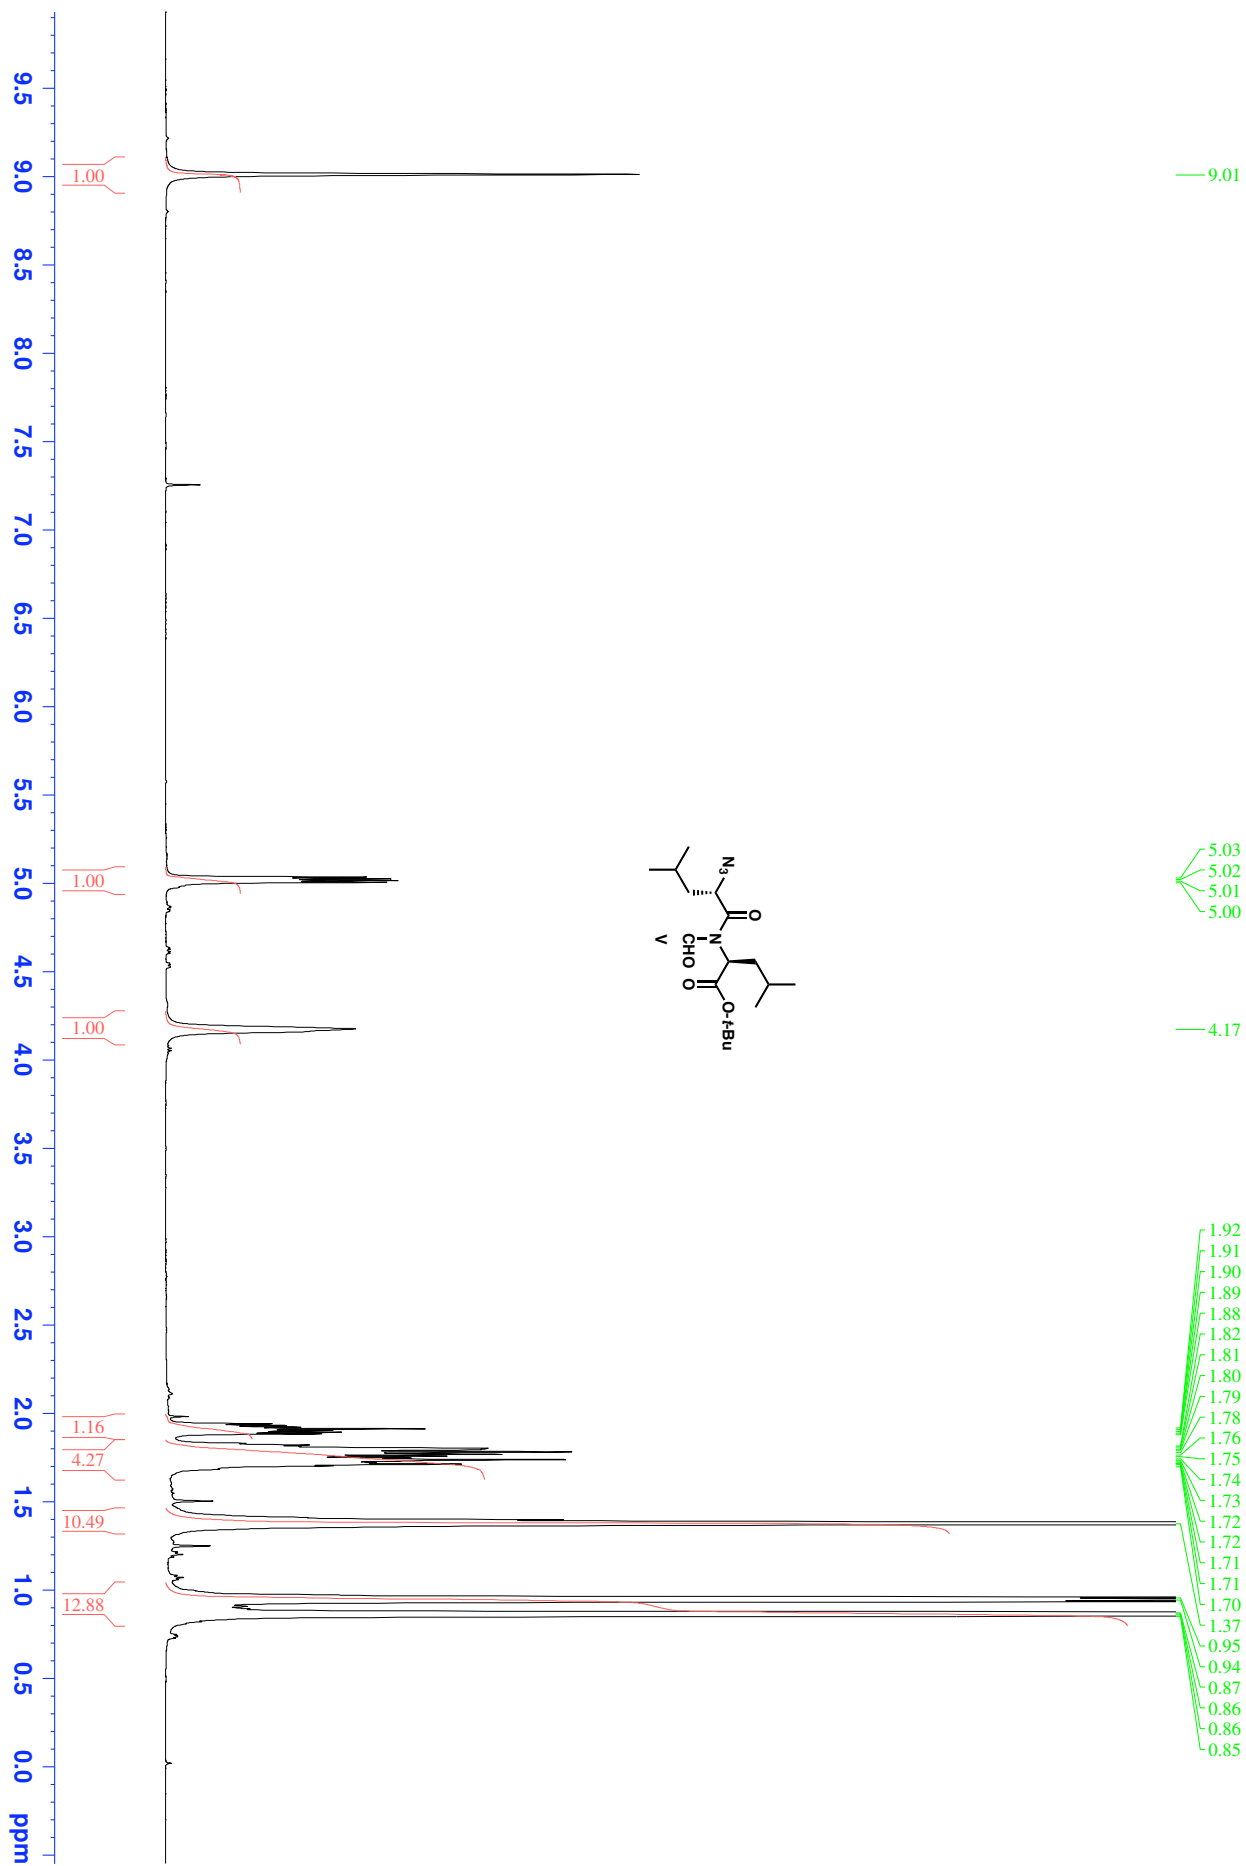

Carbon . \* WUX1 xw-V-18C13 (1 1) CDC13 24.0C January\_13,2010\_15:32:22 DRX 500MHz zgpg30 13C; 1H O2=4.000 \*

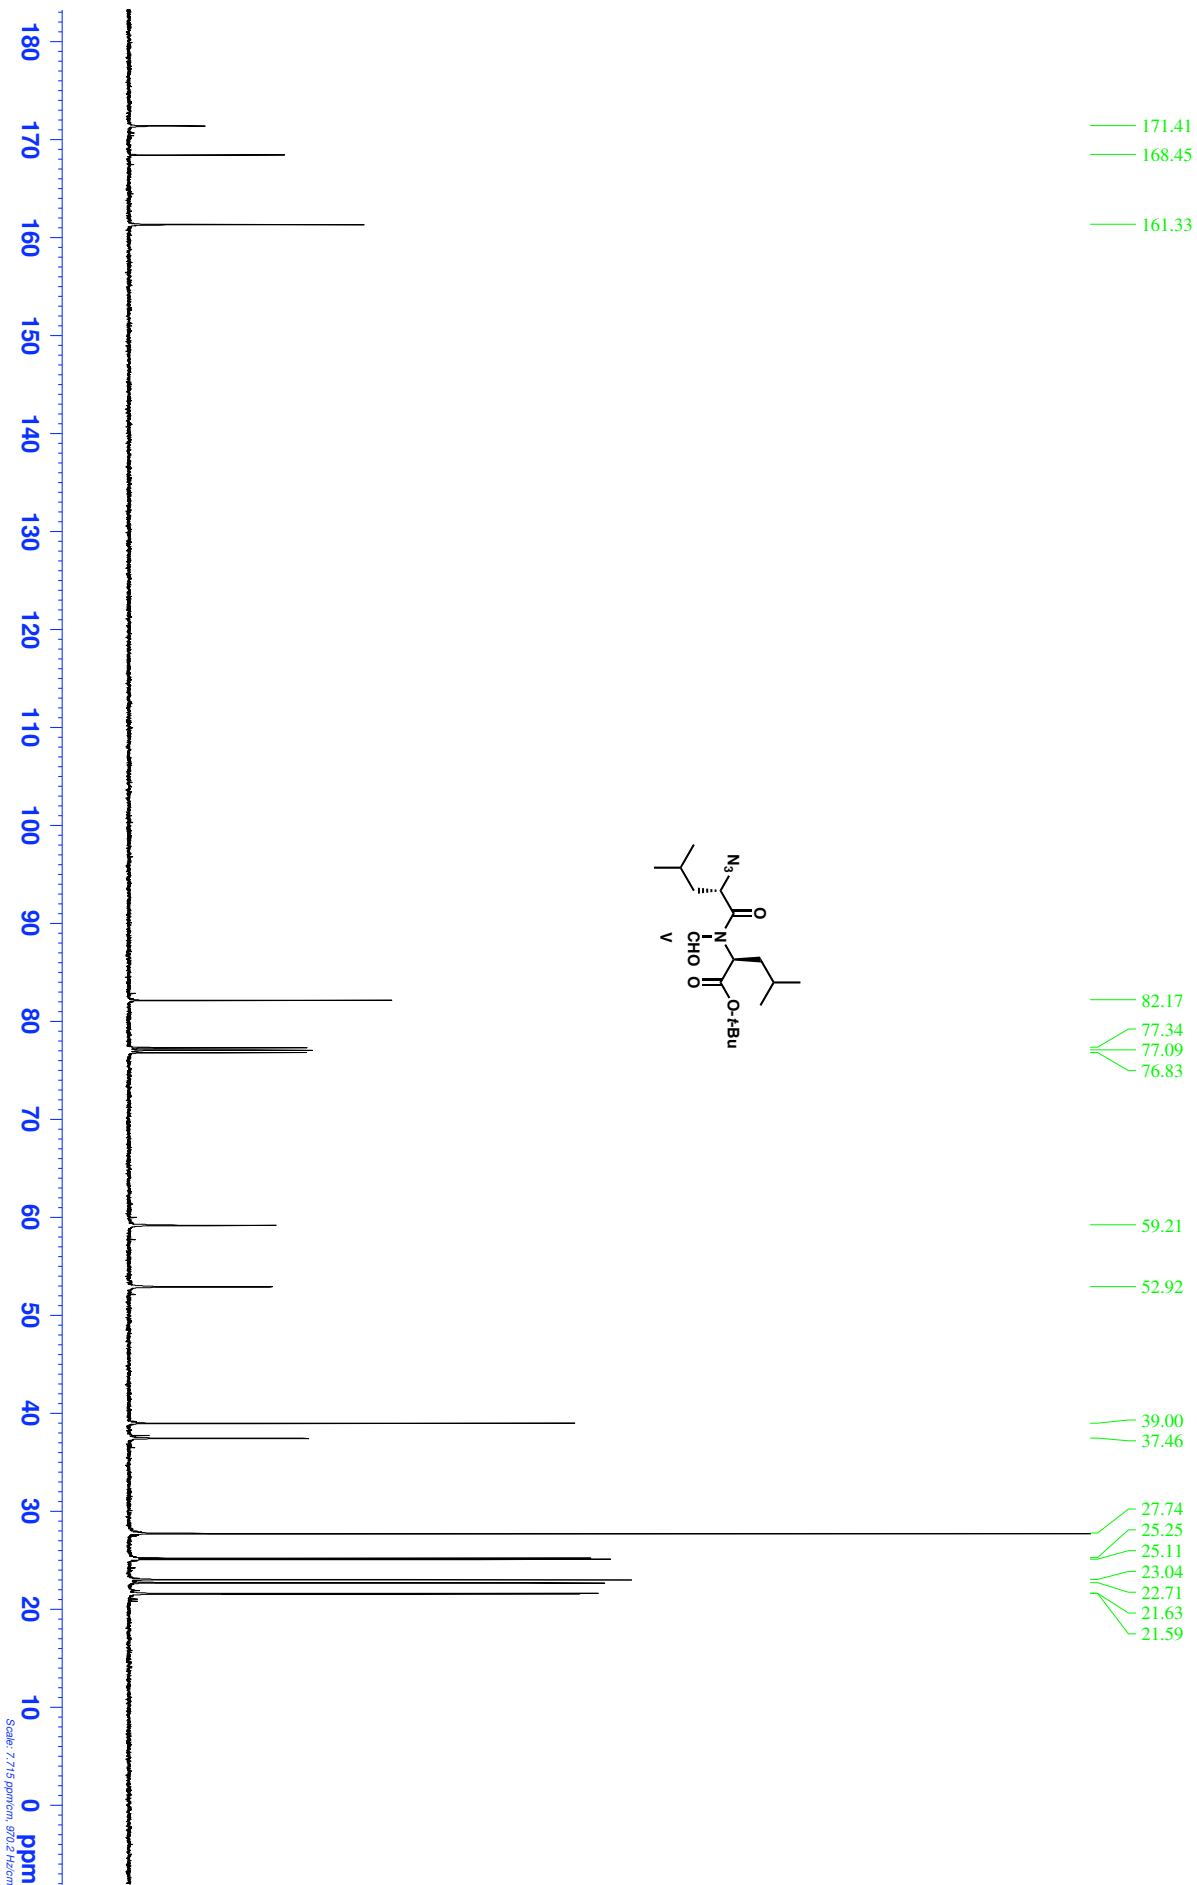







\* WUX1 XW-V-46H (10 1) CDCl3 24.0C July\_15,2010\_18:13:01 Bruker AVIII 600MHz RRL1326: janggeum zg30 : 1H 7.500 ppm \*

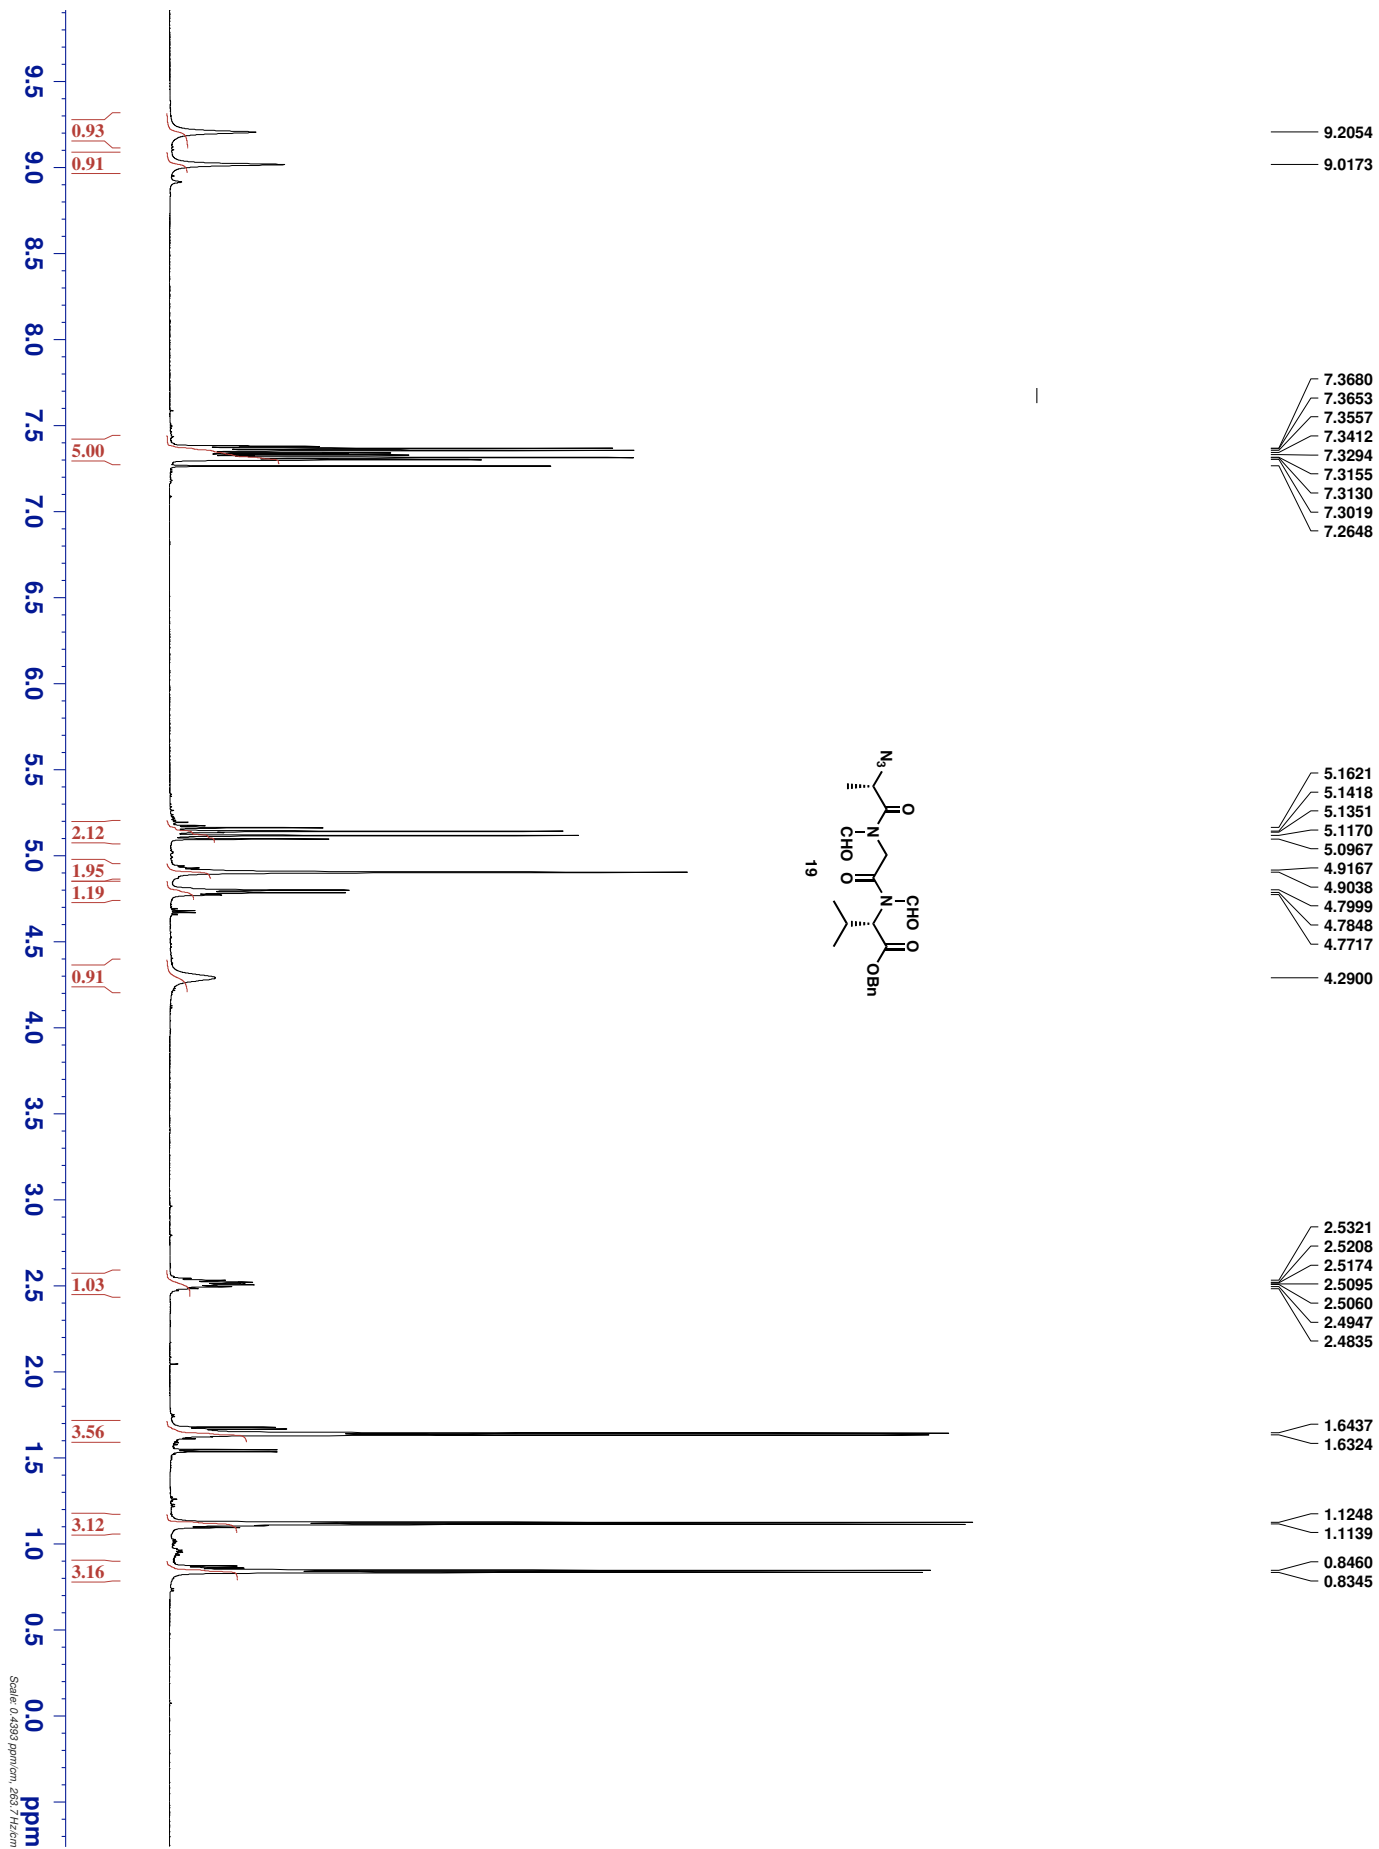

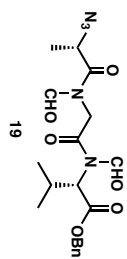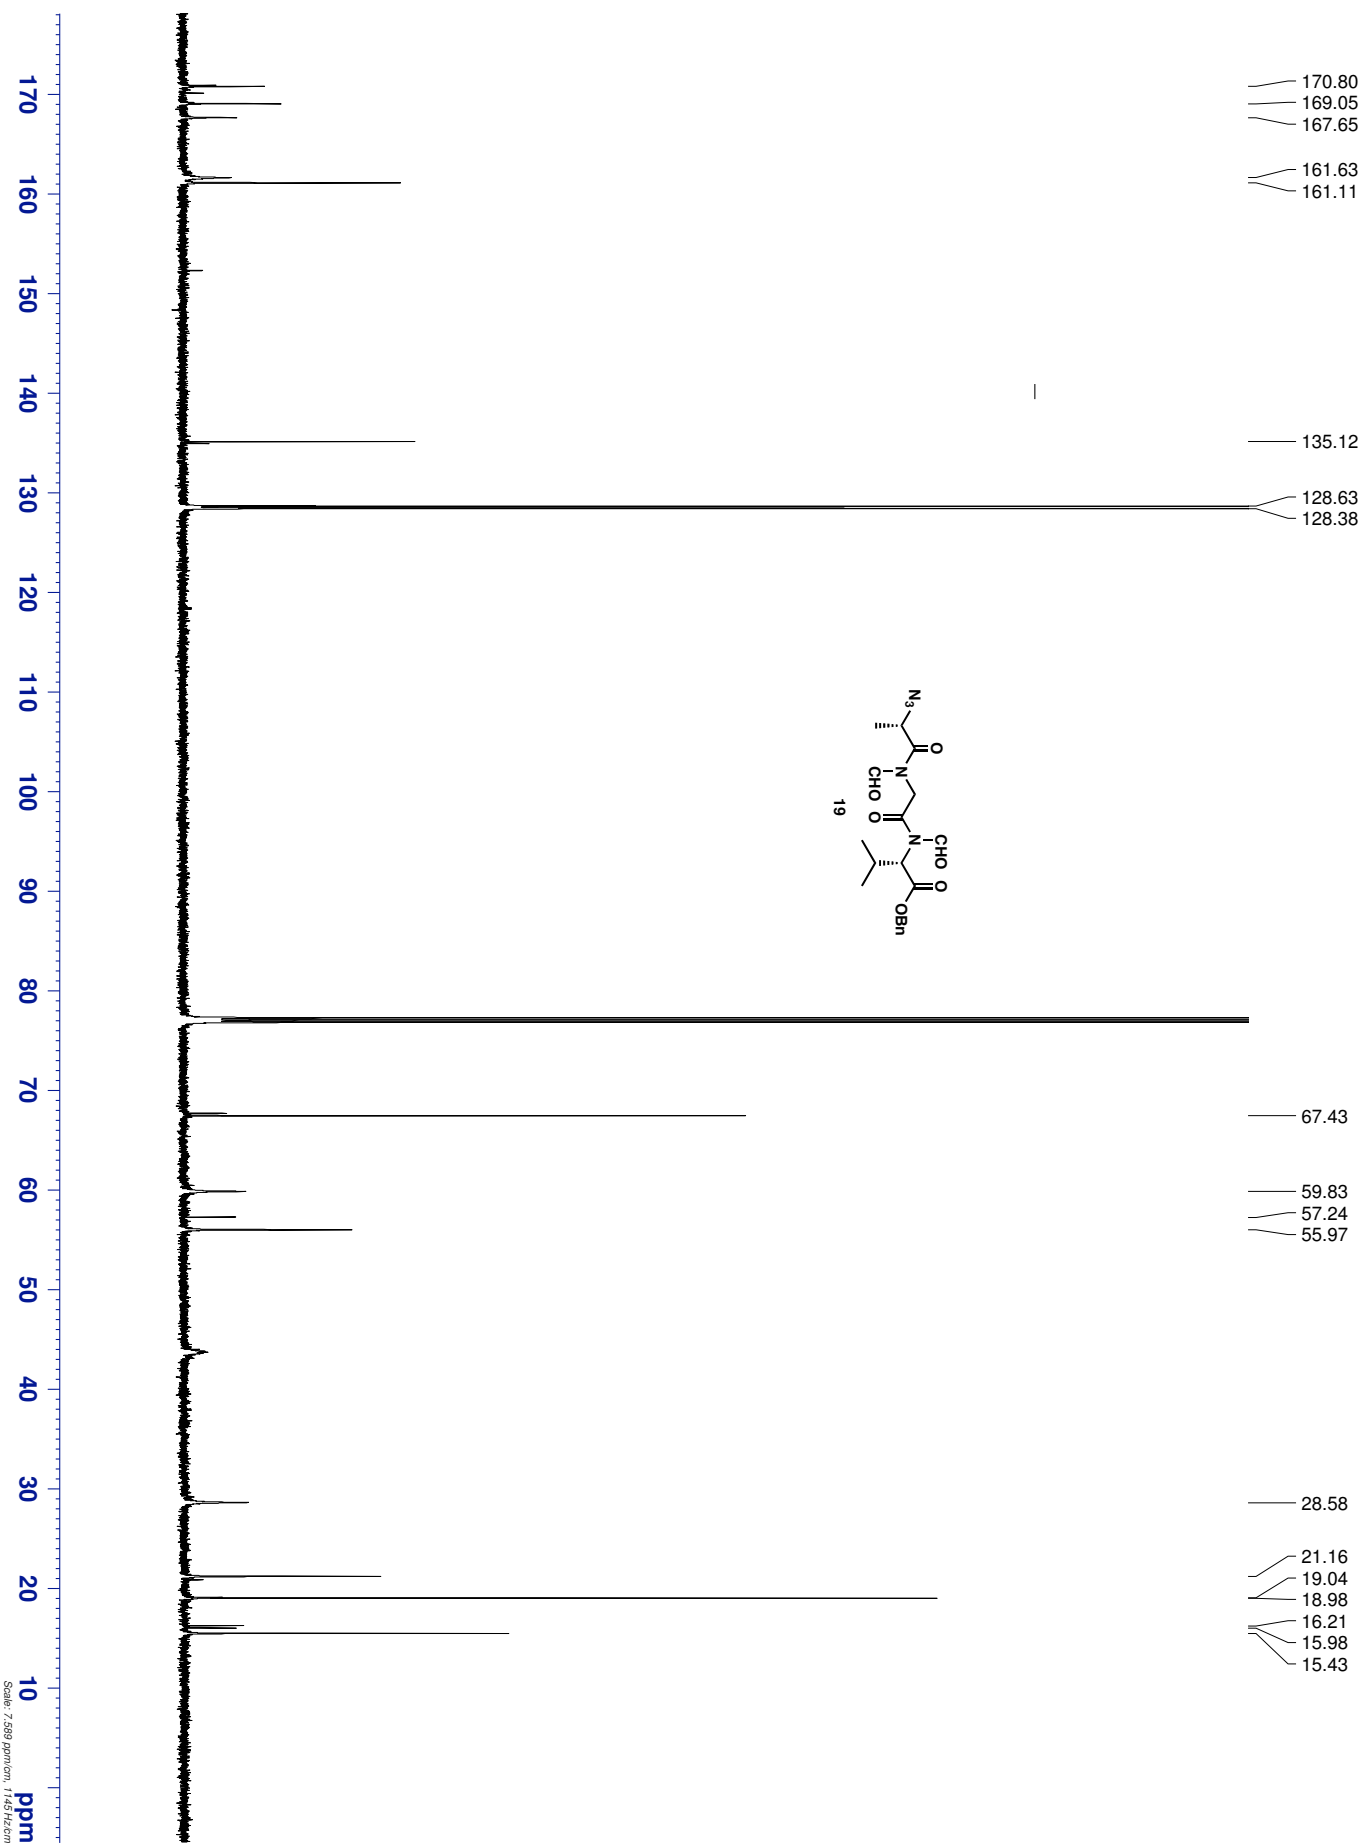





\* WUX1 XW-V-20H (10 1) CDCl3 24.0C April\_17\_2010\_22:45:21 Bruker AVIII 600MHz RRL1326 : janggeum zg30 : 1H 7.500 ppm \*

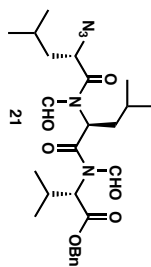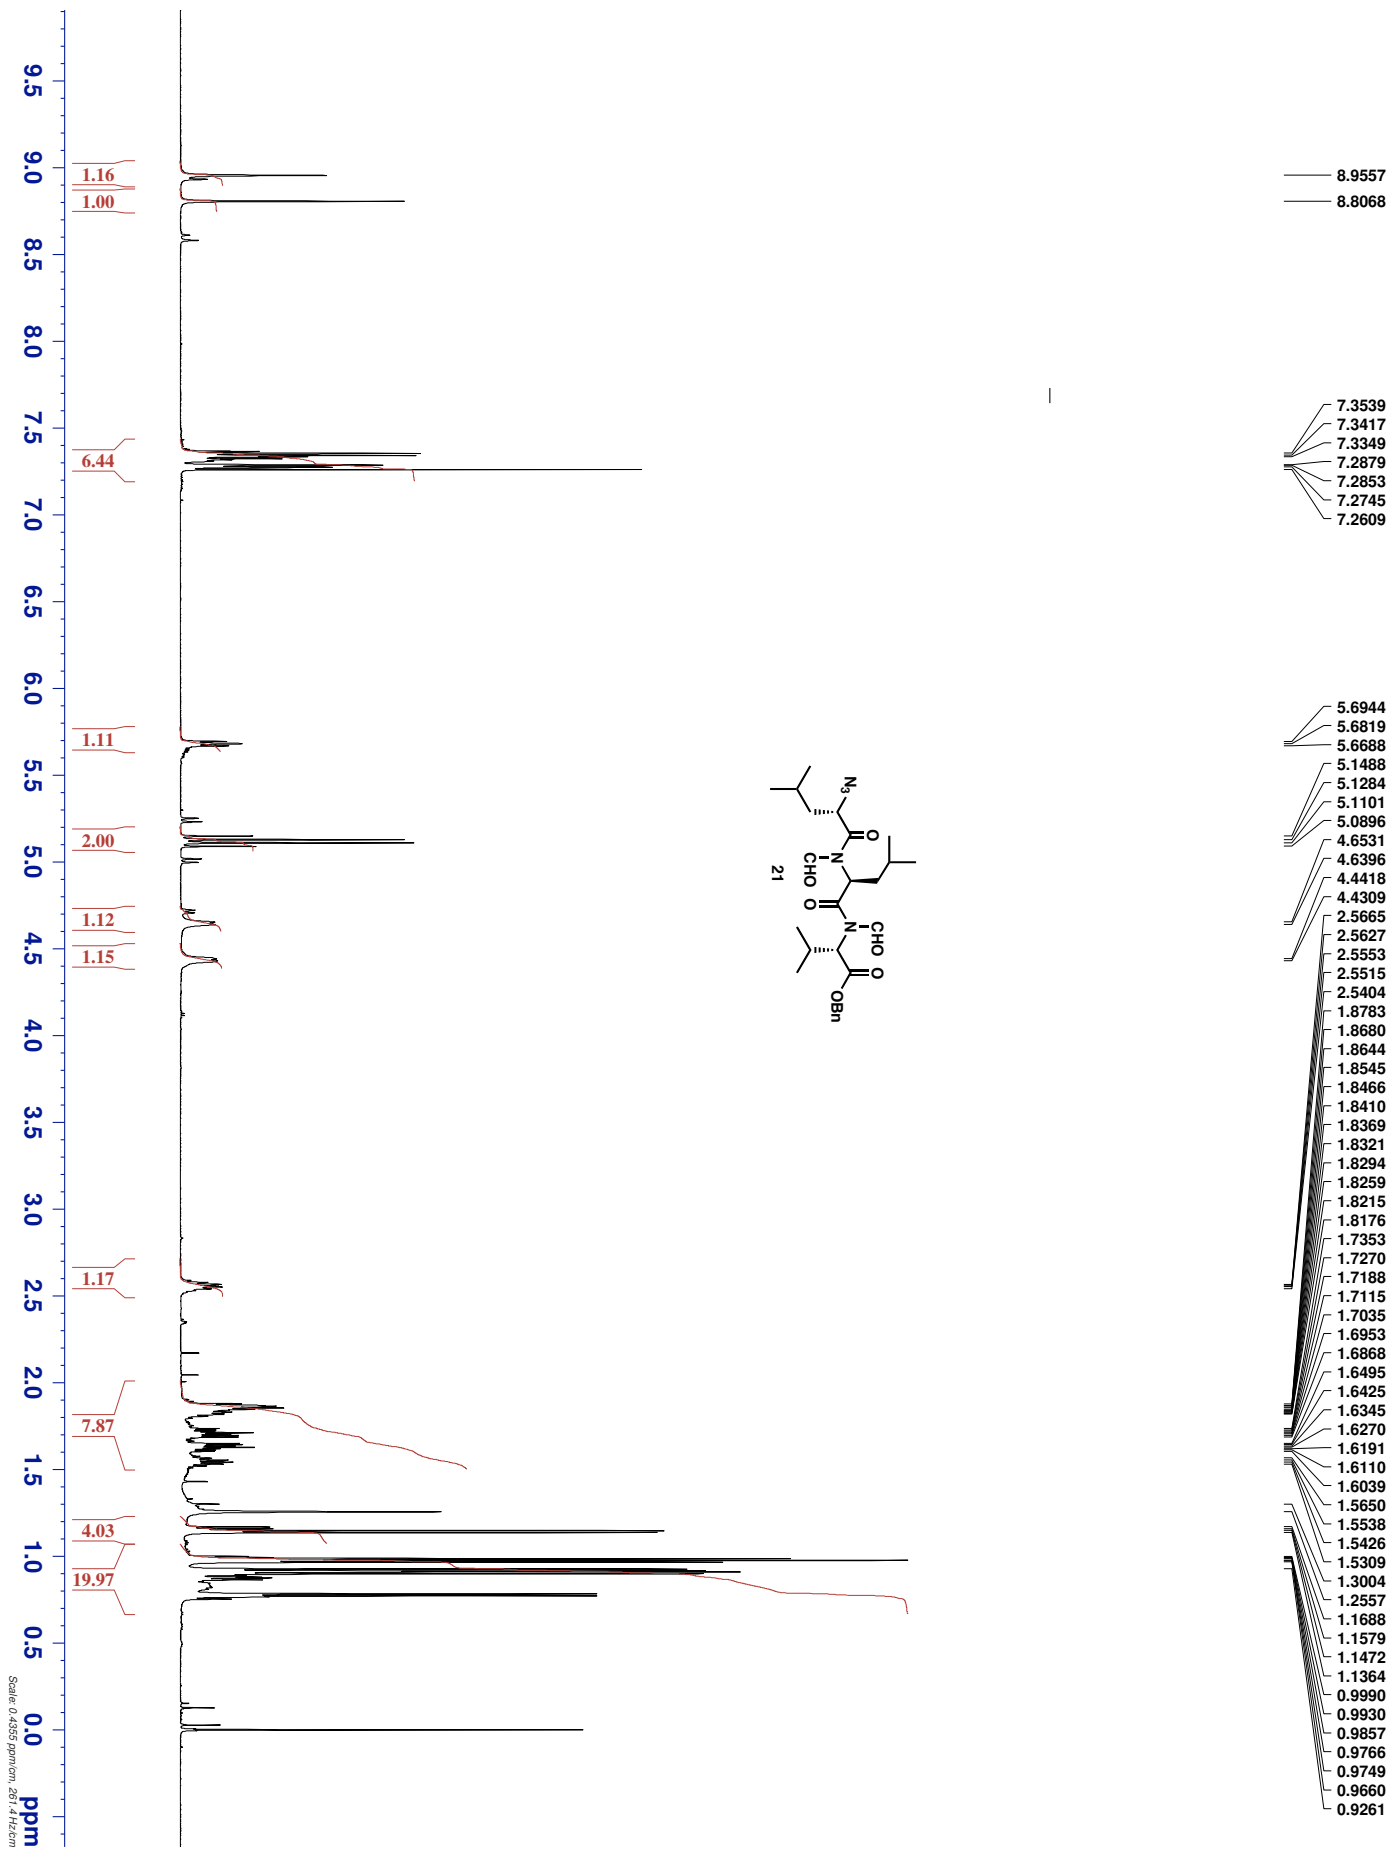









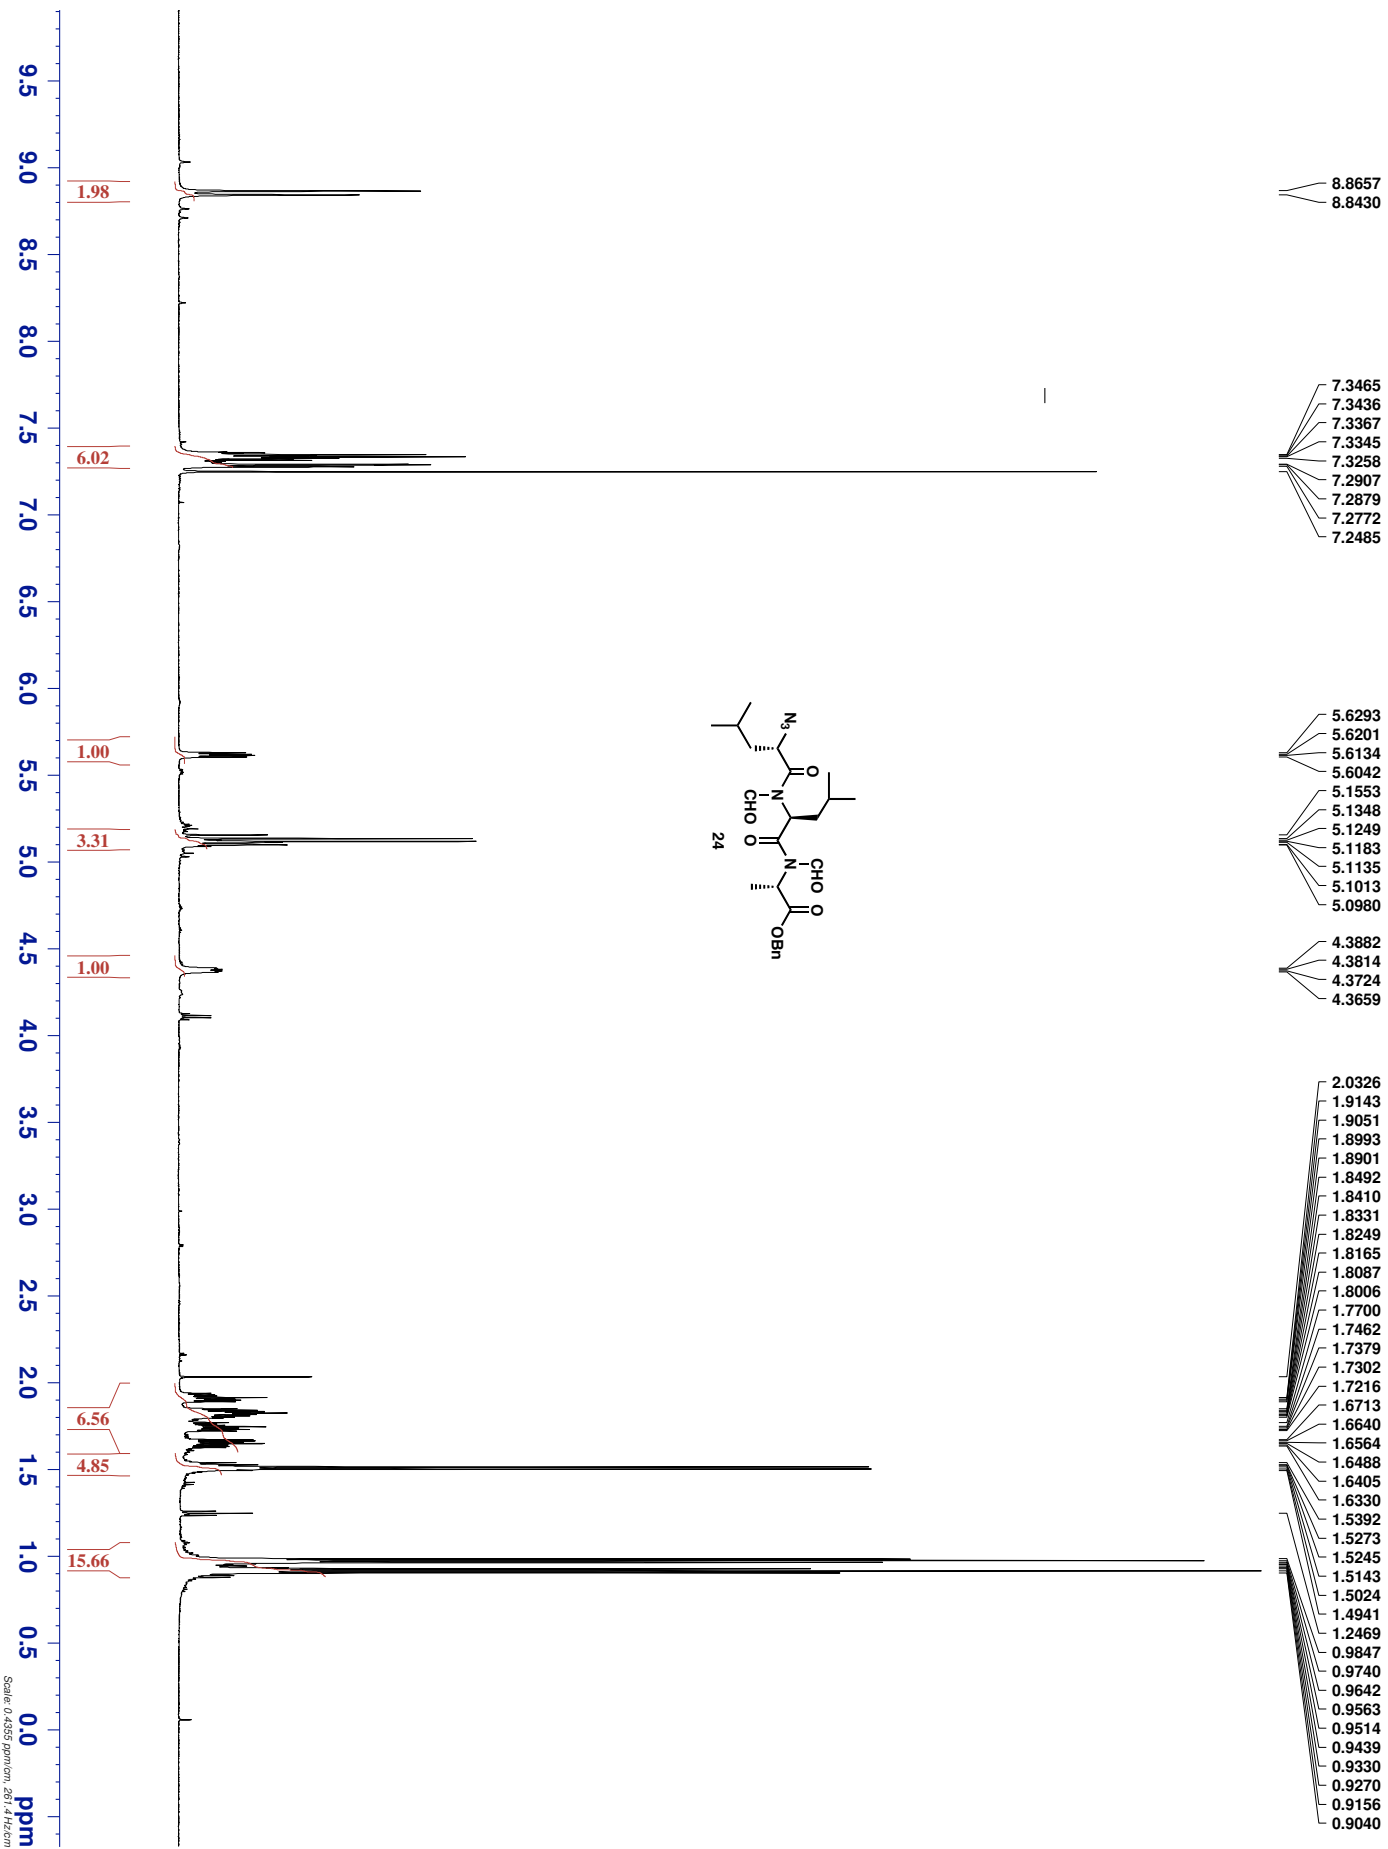



\* WUX1 XW-V-21 (10 1) CDCl3 24.0C March\_08,2011\_15:01:25 Bruker AVIII 600MHz RRL1326: janggeum zg30 : 1H 7.500 ppm \*

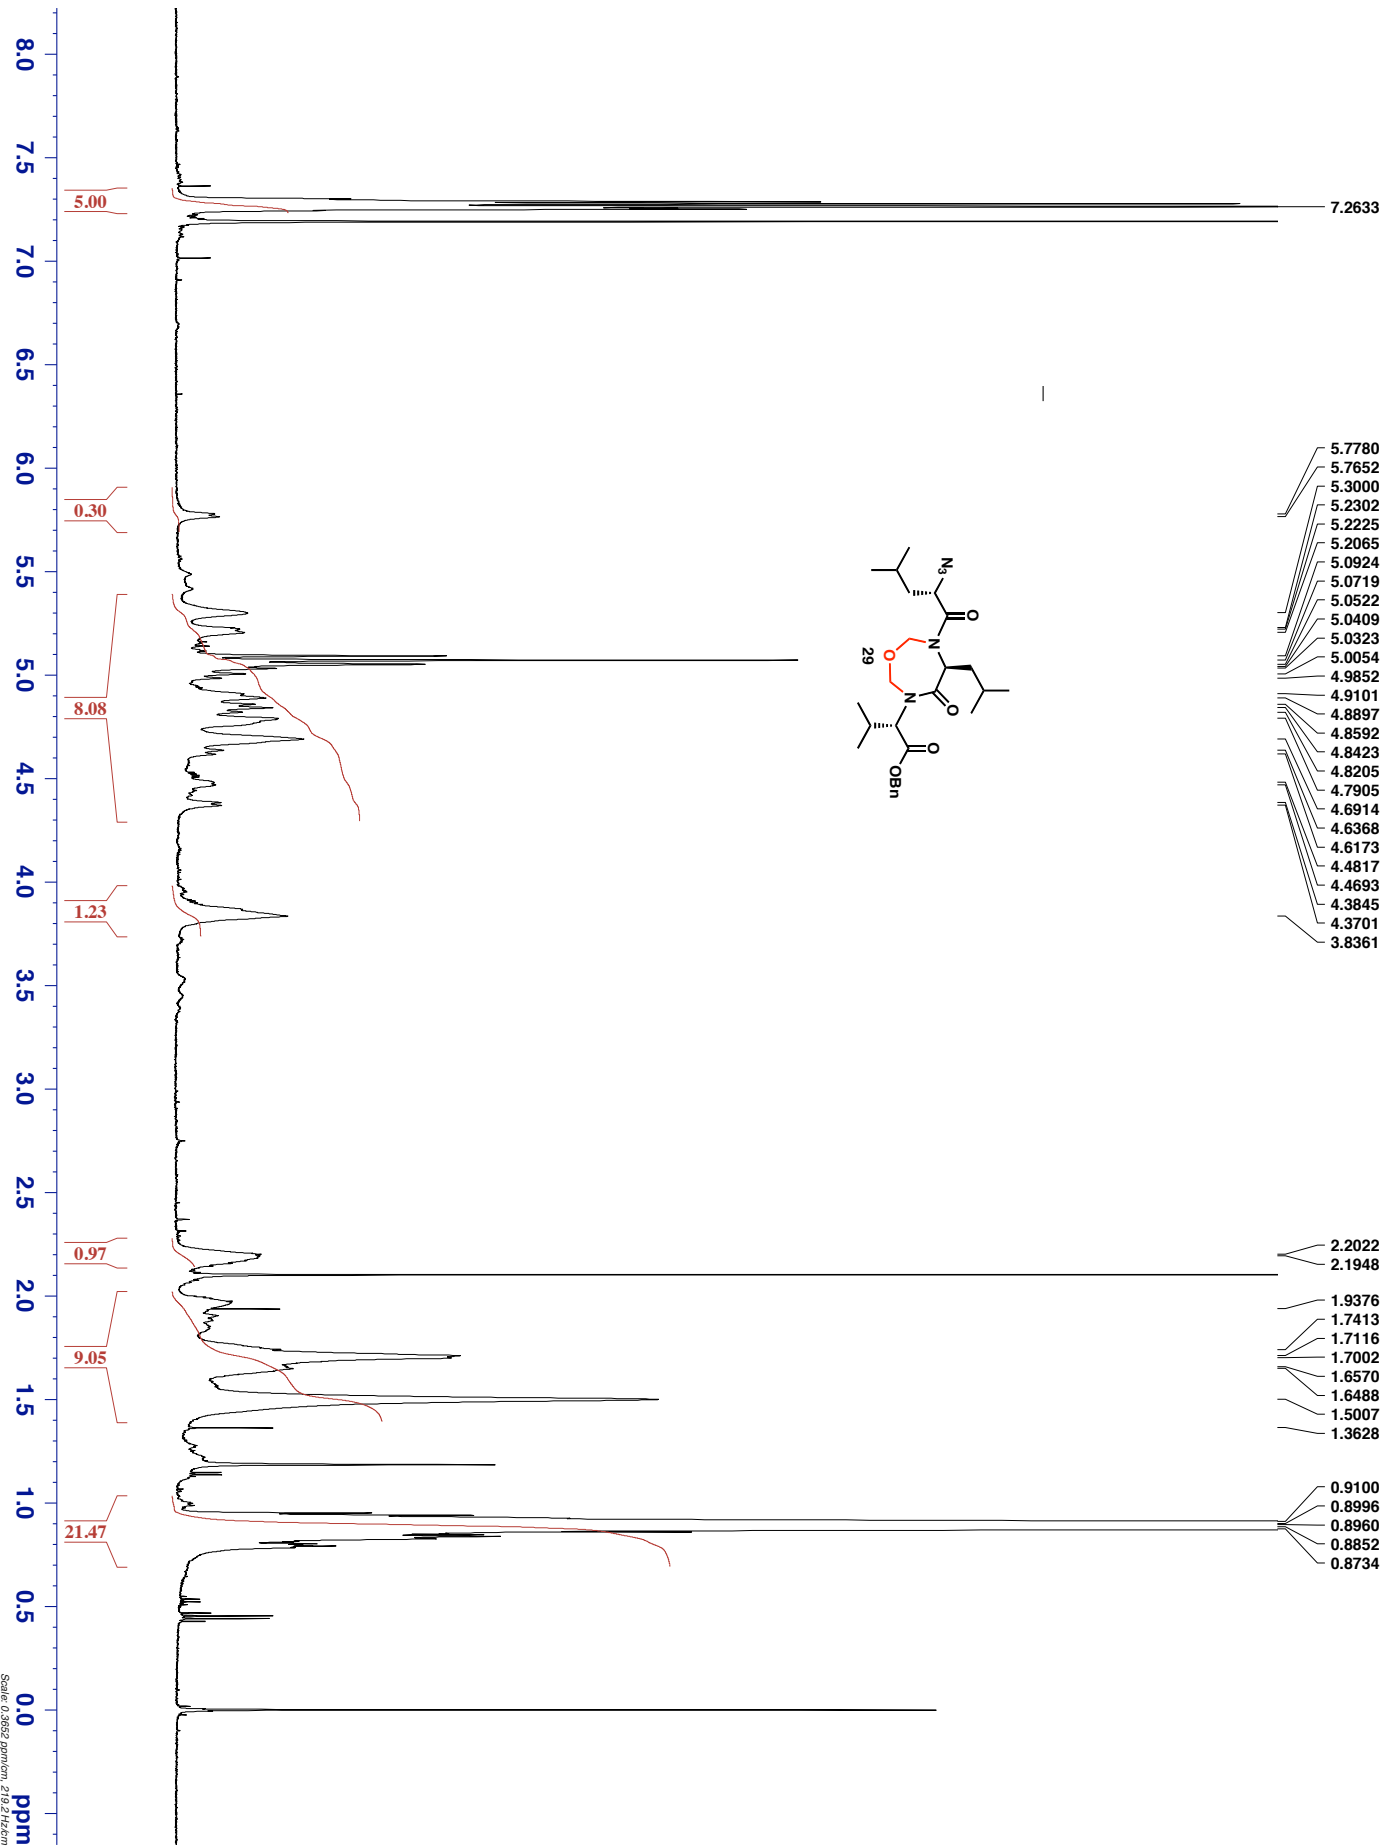

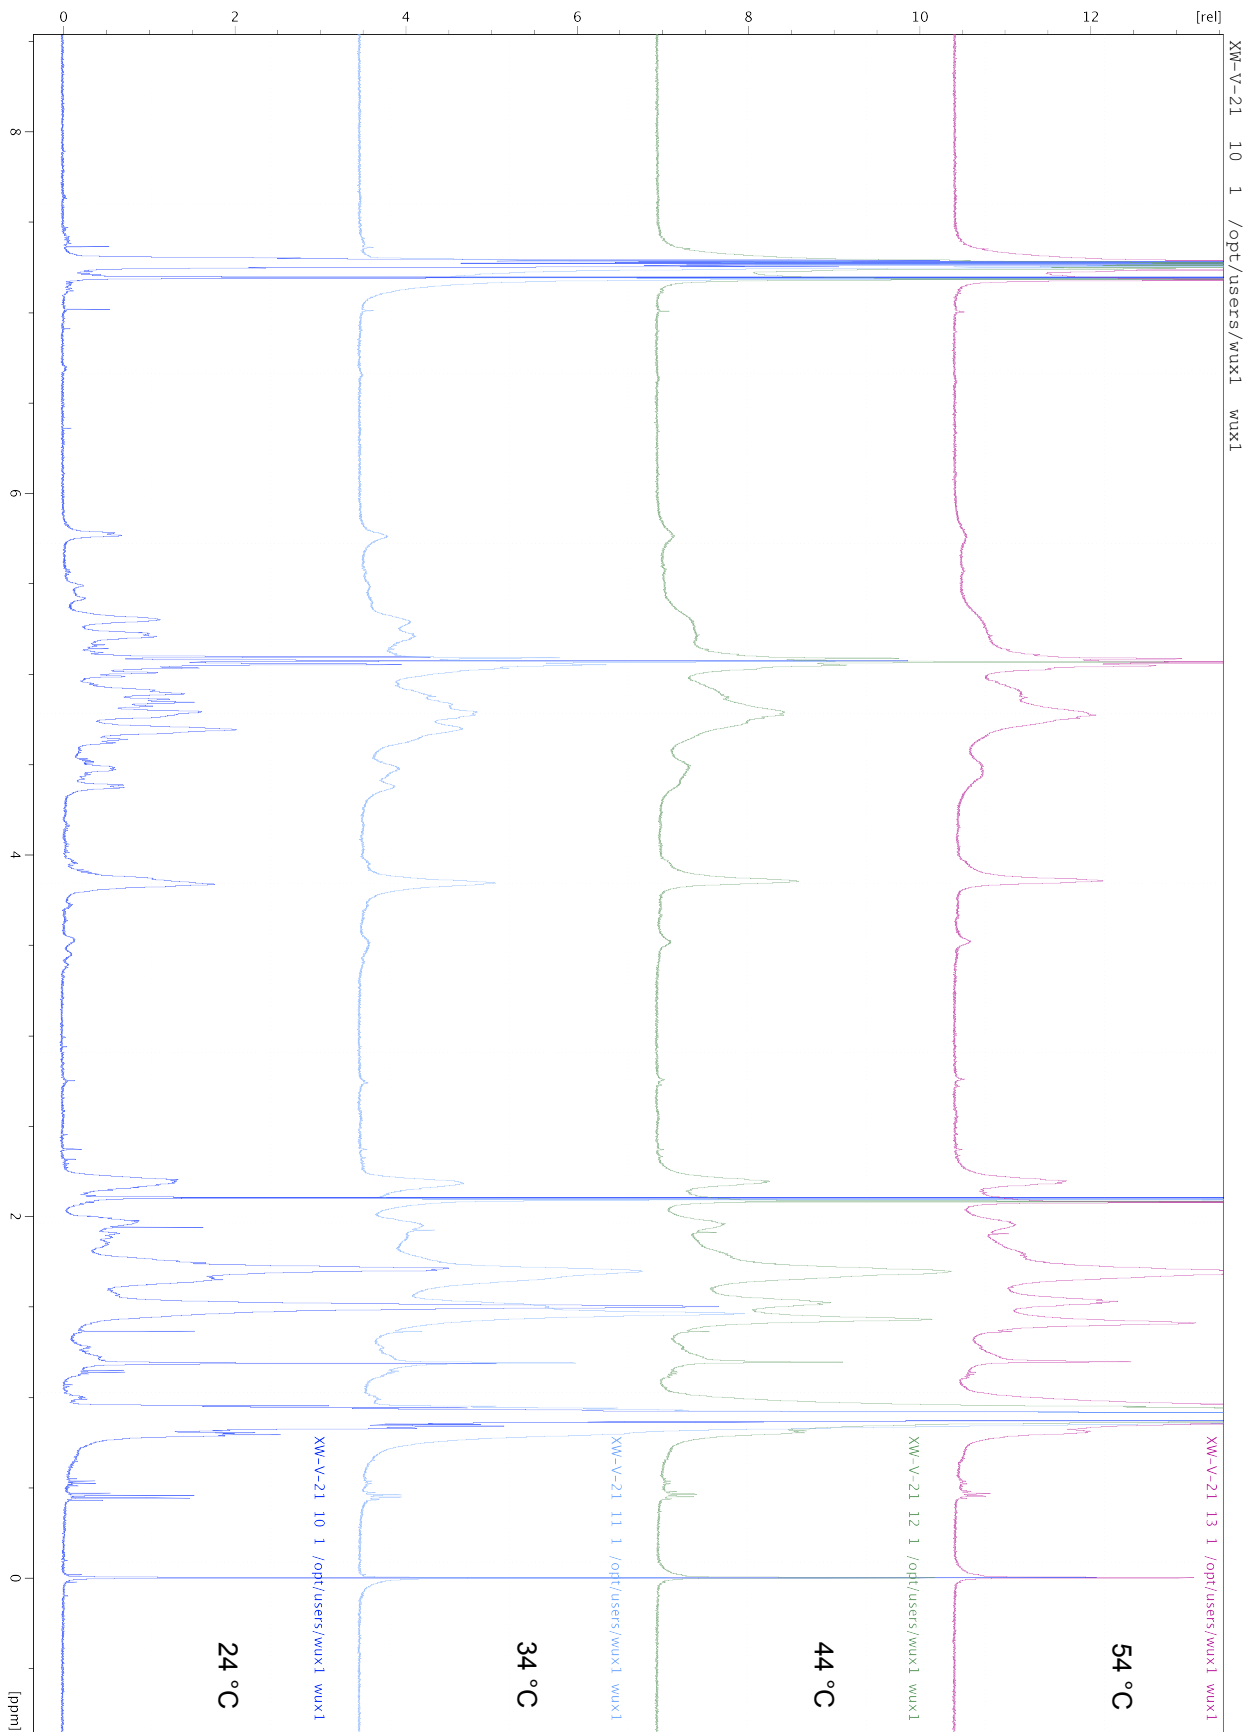

\* WUX1 XW-V-24 (10 1) DMSO 24.0C February\_22,2010\_16:21:18 Bruker AVIII 600MHz RRL1326: janggeum zg30 : 1H 7.500 ppm \*

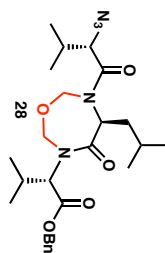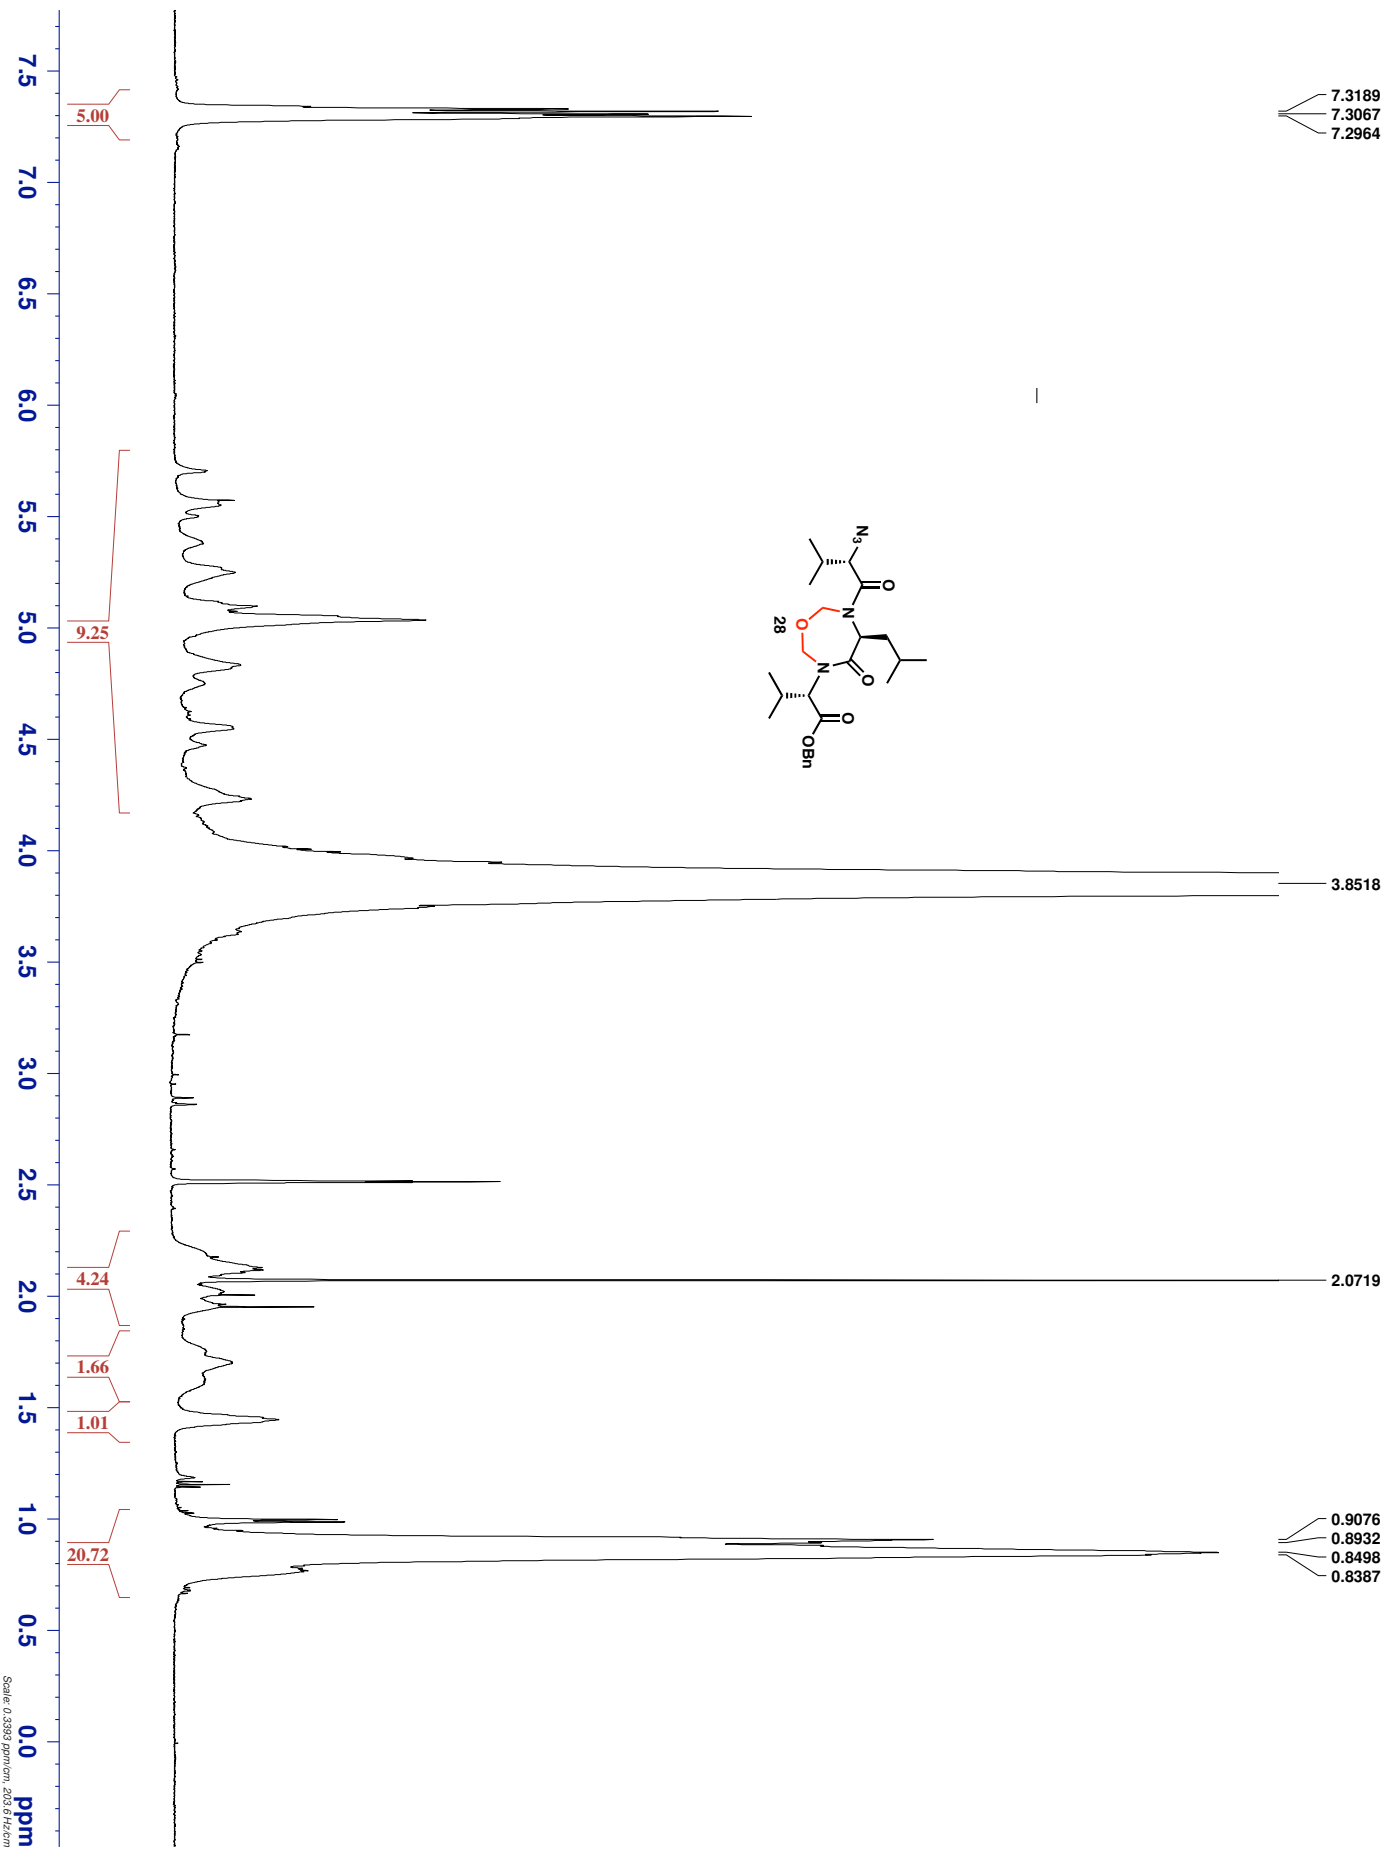

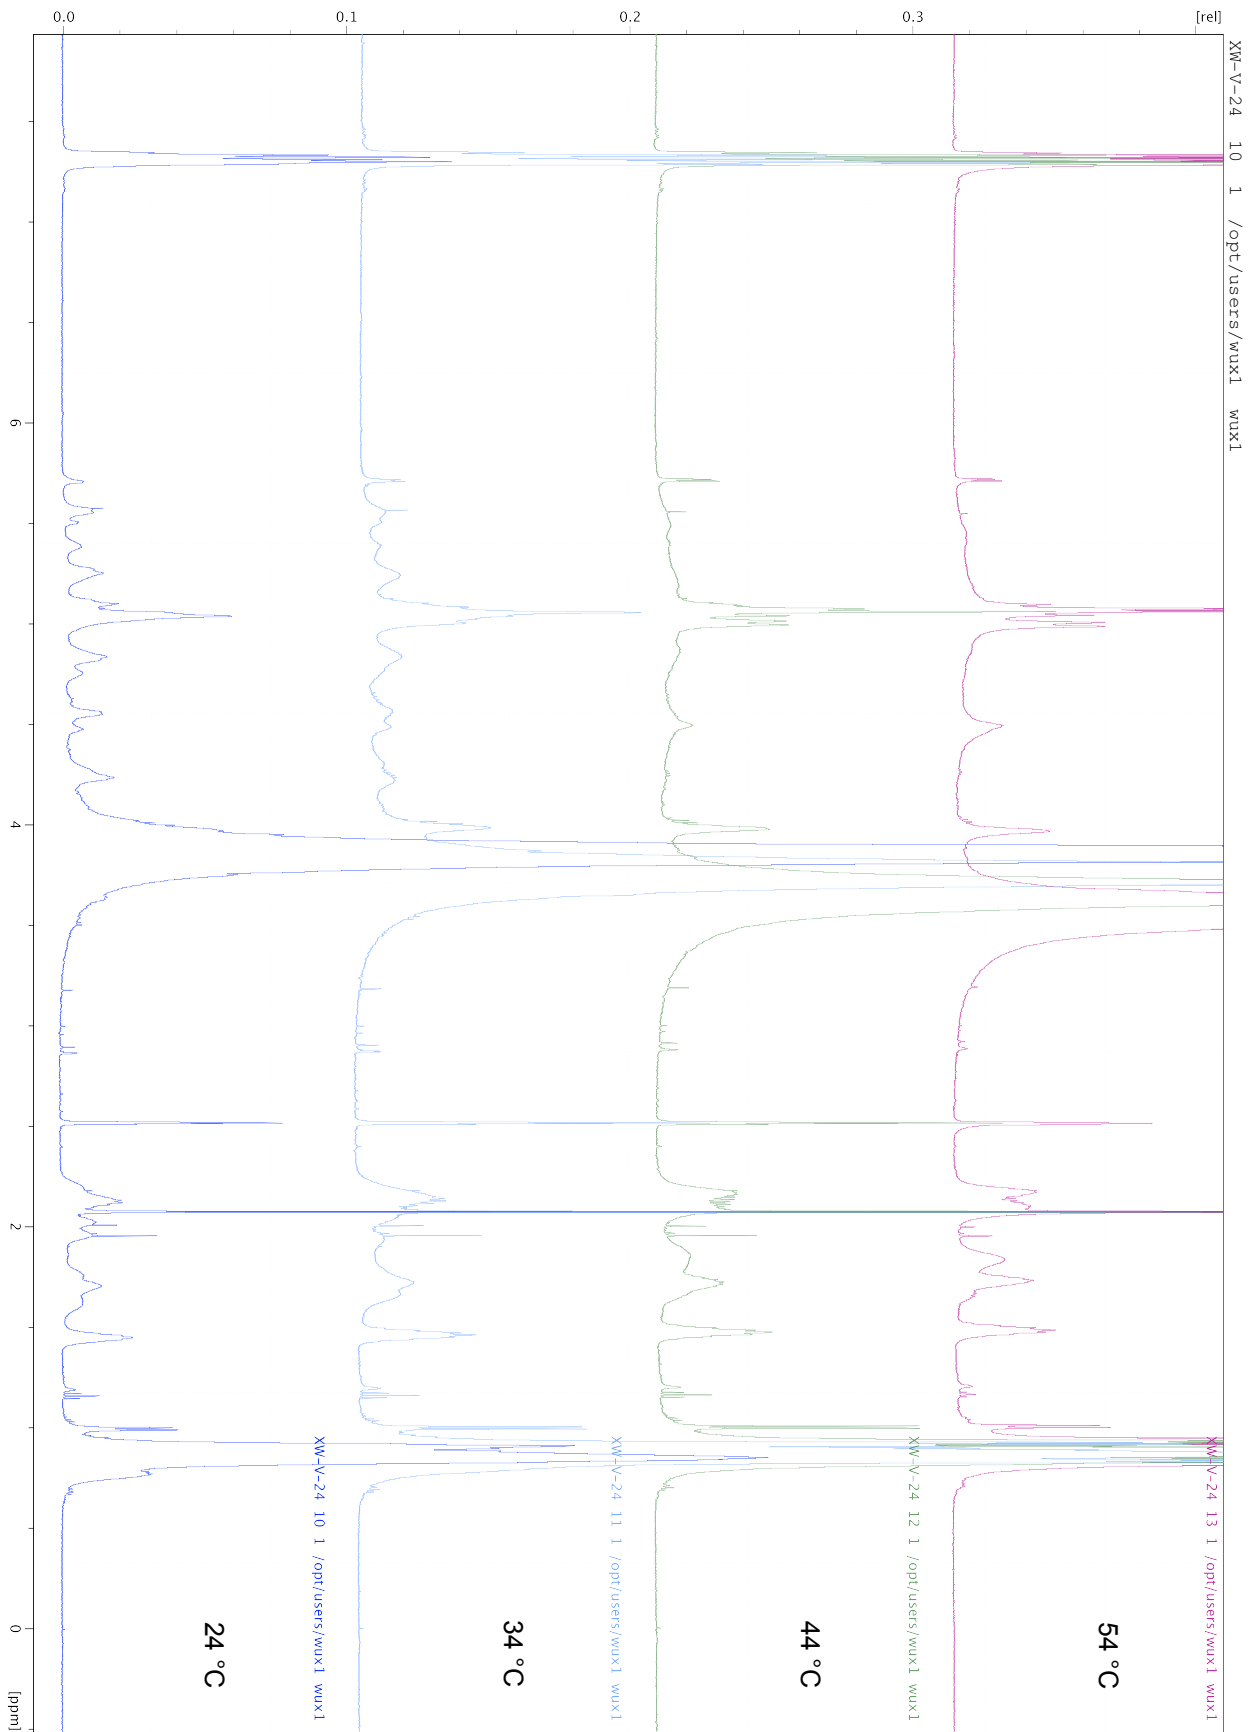

\* WUX1 XW-V-52 (10 1) CDCI3 24.0C March\_09,2011\_15:21:06 Bruker AVIII 600MHz RRL1326: janggeum zg30 : 1H 7.500 ppm \*

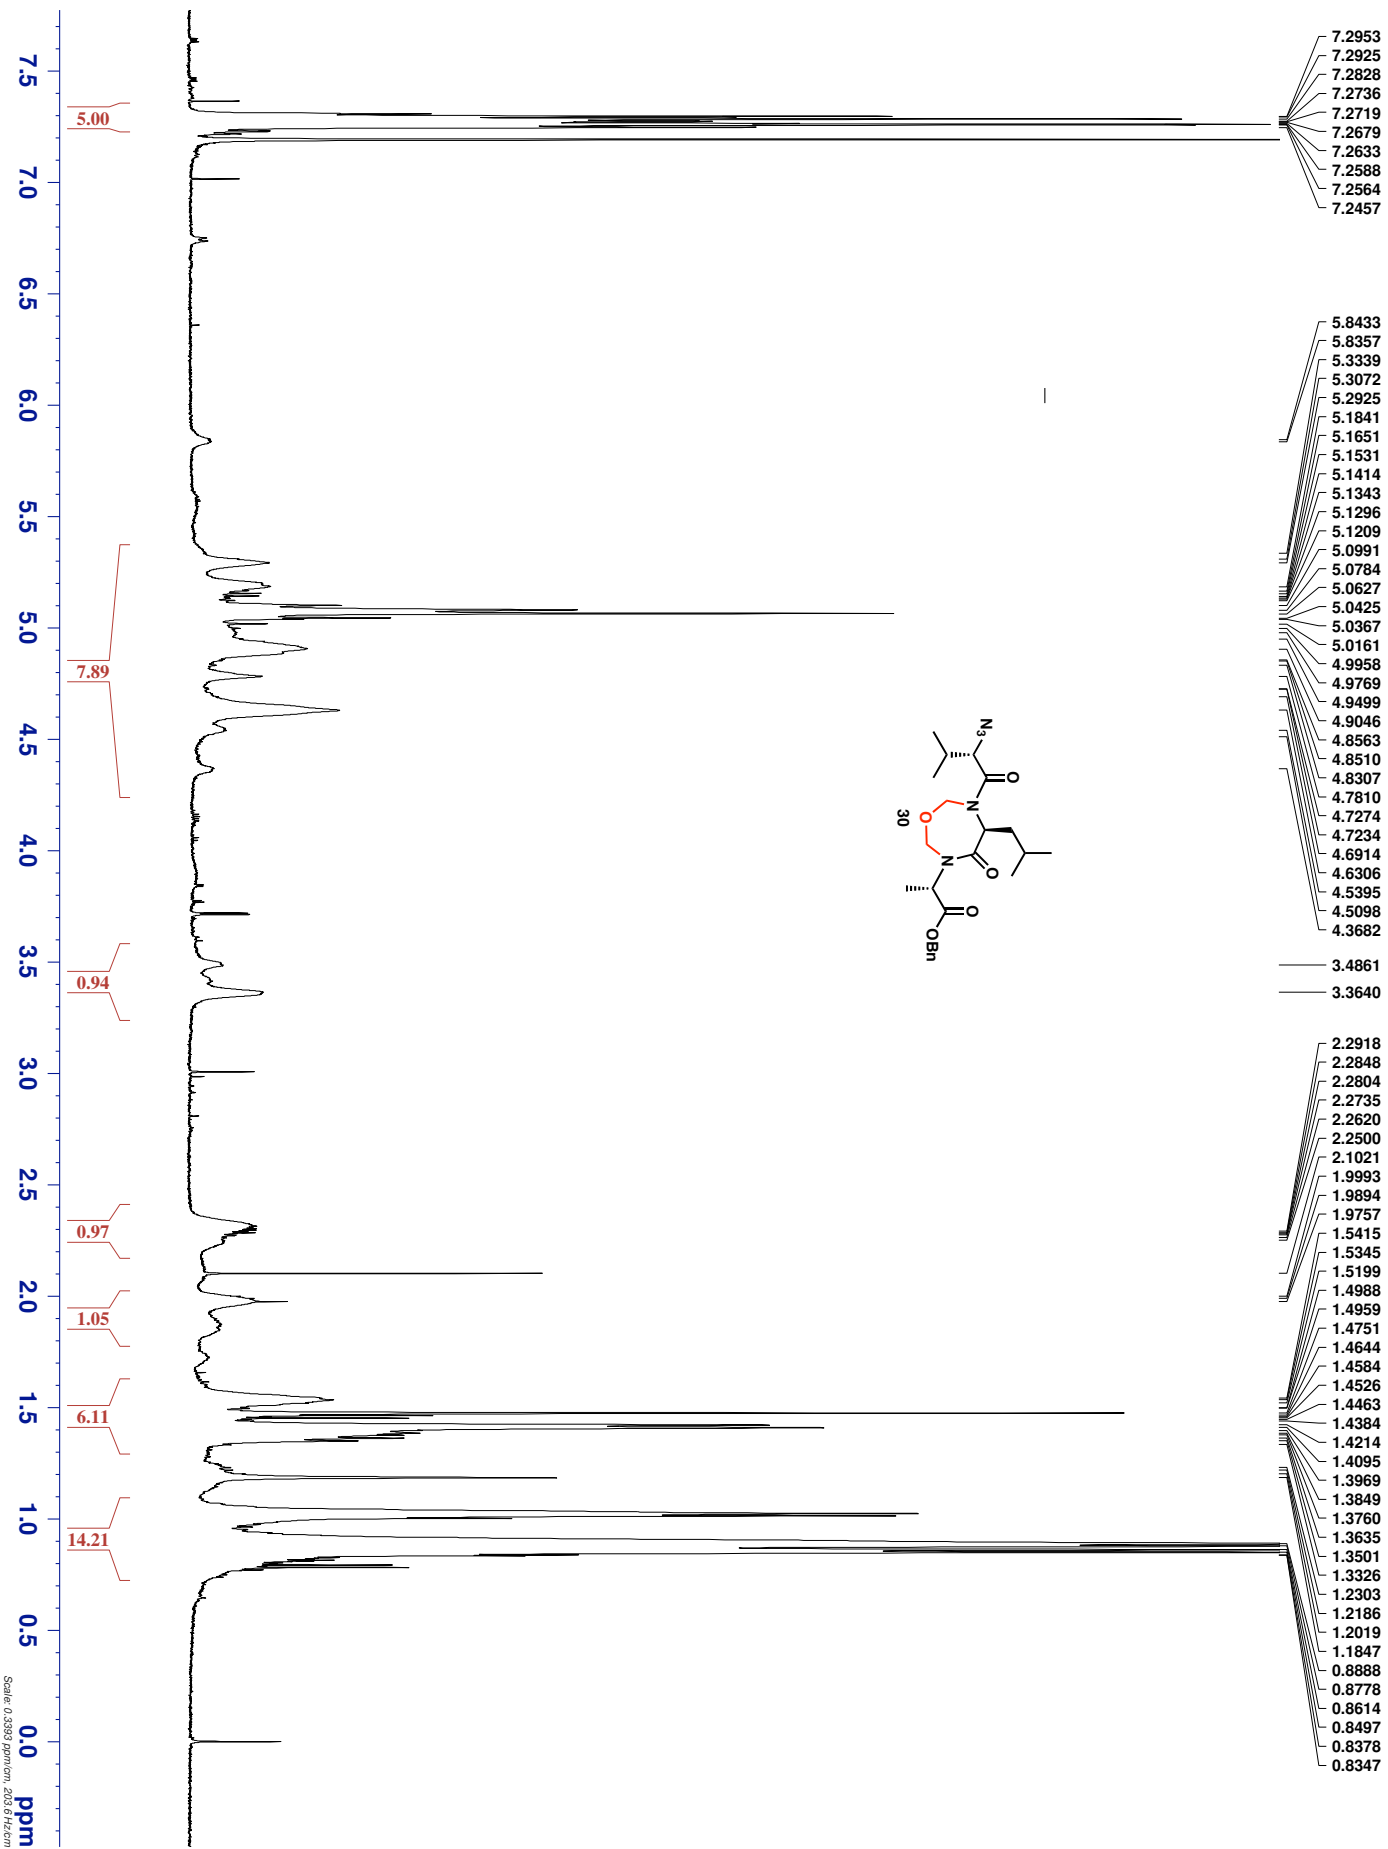

7.2953  
7.2925  
7.2828  
7.2736  
7.2719  
7.2679  
7.2633  
7.2588  
7.2564  
7.2457

5.8433  
5.8357  
5.3339  
5.3072  
5.2925  
5.1841  
5.1651  
5.1531  
5.1414  
5.1343  
5.1296  
5.1209  
5.0991  
5.0784  
5.0627  
5.0425  
5.0367  
5.0161  
4.9958  
4.9769  
4.9499  
4.9046  
4.8563  
4.8510  
4.8307  
4.7810  
4.7274  
4.7234  
4.6914  
4.6306  
4.5395  
4.5098  
4.3682  
3.4861  
3.3640

2.2918  
2.2848  
2.2804  
2.2735  
2.2620  
2.2500  
2.1021  
1.9993  
1.9894  
1.9757  
1.5415  
1.5345  
1.5199  
1.4988  
1.4959  
1.4751  
1.4644  
1.4584  
1.4526  
1.4463  
1.4384  
1.4214  
1.4095  
1.3969  
1.3849  
1.3760  
1.3635  
1.3501  
1.3326  
1.2303  
1.2186  
1.2019  
1.1847  
0.8888  
0.8778  
0.8614  
0.8497  
0.8378  
0.8347

Scale: 0.3392 ppm/cm, 200 Hz/cm



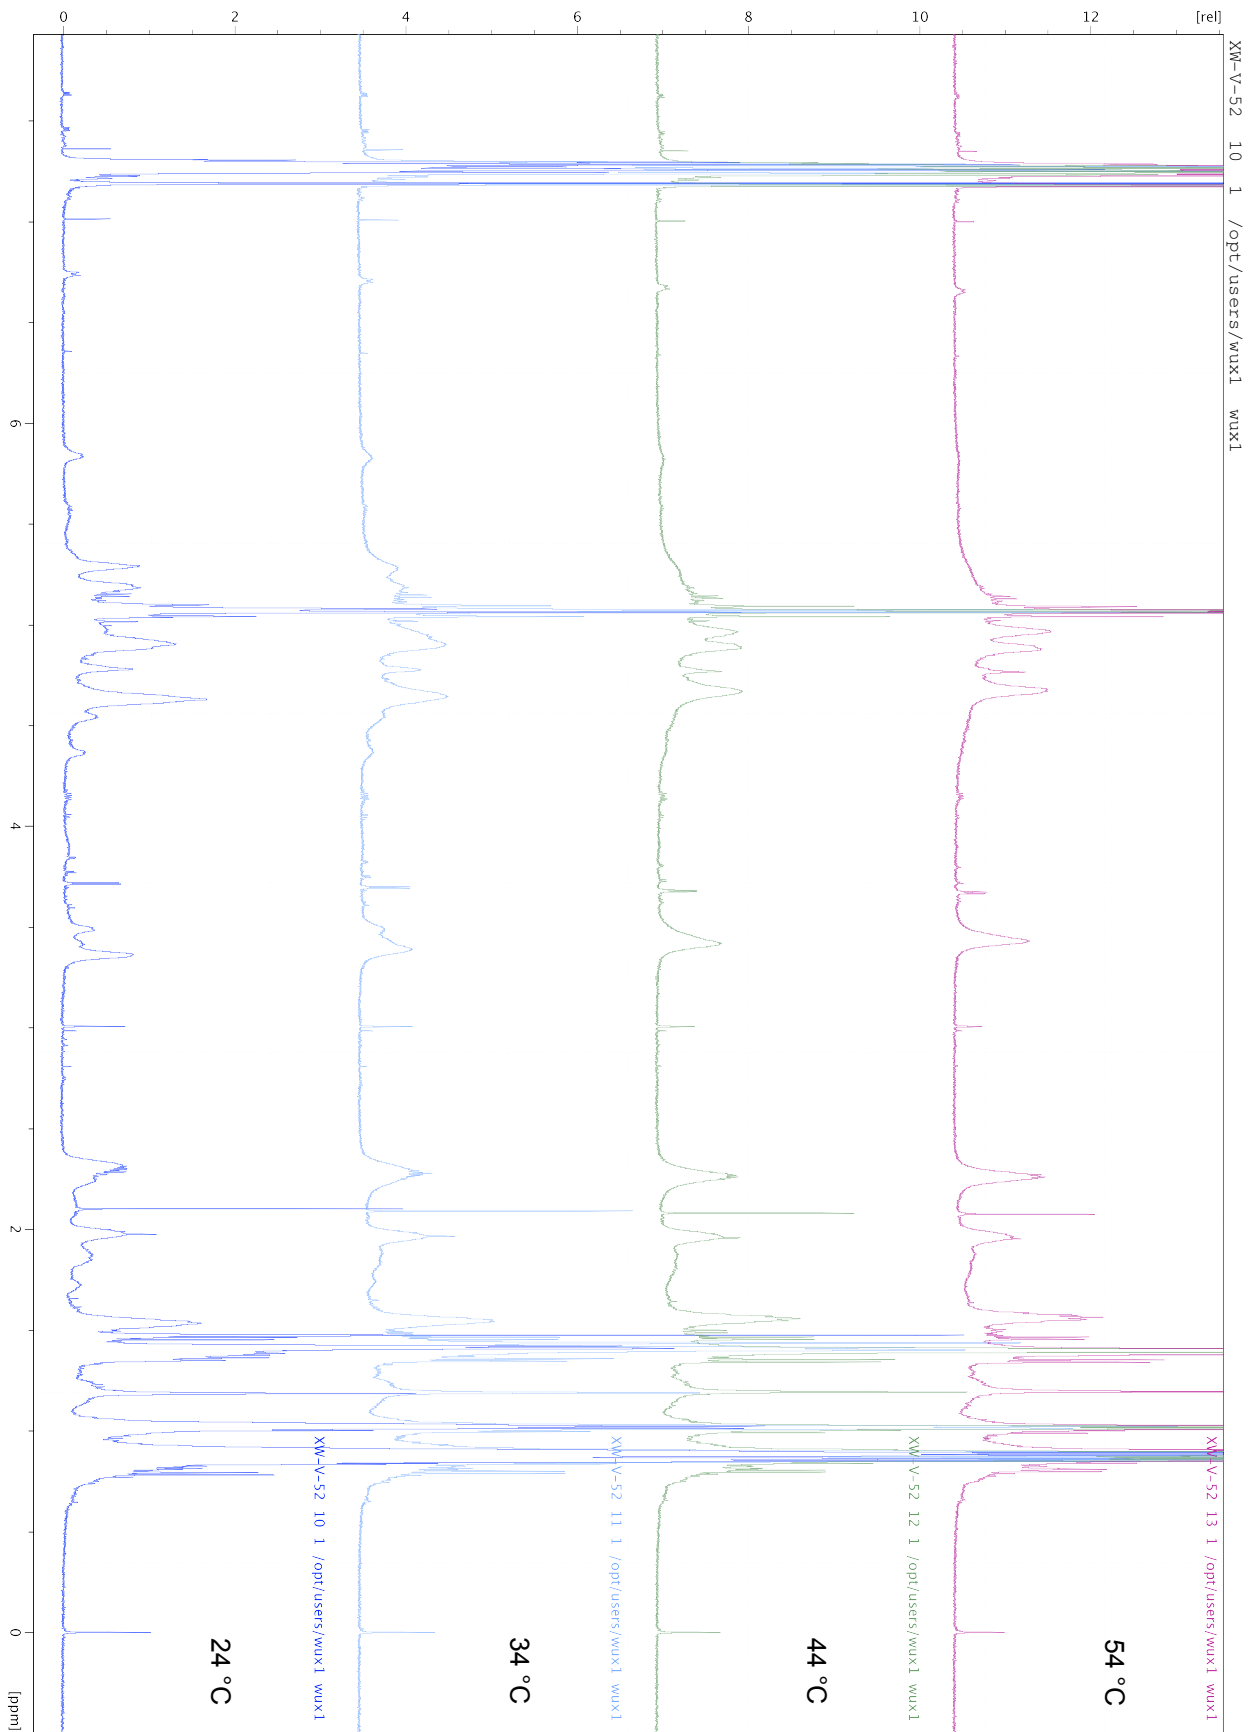

\* wux1 XW-V-51a (10 1) CDCl3 24.0C March 09,2011 17:26:52 Bruker AVIII 600MHz RRL1326: janggeum zg30 : 1H 7.500 ppm \*  
 :Proton\_VT CDCl3 /opt/users/wux1 wux1 8

- 7.2985
- 7.2963
- 7.2858
- 7.2775
- 7.2661
- 7.2611
- 7.2586
- 7.2480
- 5.7414
- 5.2670
- 5.2304
- 5.1020
- 5.0821
- 5.0660
- 5.0460
- 4.8591
- 4.8403
- 4.6614
- 4.6433
- 4.6339
- 4.6269
- 4.6141
- 4.3261
- 4.3149
- 3.8639
- 3.8555
- 3.8435
- 2.1023
- 1.9758
- 1.9011
- 1.8949
- 1.8901
- 1.8782
- 1.8668
- 1.8567
- 1.7950
- 1.7870
- 1.7847
- 1.7767
- 1.7718
- 1.7697
- 1.7609
- 1.7587
- 1.7538
- 1.7476
- 1.7367
- 1.7202
- 1.7092
- 1.6970
- 1.6882
- 1.6810
- 1.6737
- 1.6663
- 1.6614
- 1.6567
- 1.6488
- 1.6426
- 1.6320
- 1.6276
- 1.6192
- 1.6170
- 1.6085
- 1.6042
- 1.5935
- 1.5374
- 1.5318
- 1.5262
- 1.5141
- 1.5027
- 1.4988
- 1.4891
- 1.4854
- 1.4657
- 1.4624
- 1.4521
- 1.4220
- 1.4105
- 1.3906
- 1.3787
- 1.3685
- 1.3619
- 1.3565
- 0.9610
- 0.9499
- 0.9366
- 0.9332
- 0.9277
- 0.9258
- 0.9225
- 0.9172
- 0.9129
- 0.9114
- 0.8977
- 0.8964
- 0.8859
- 0.8746

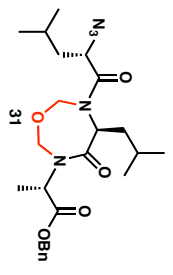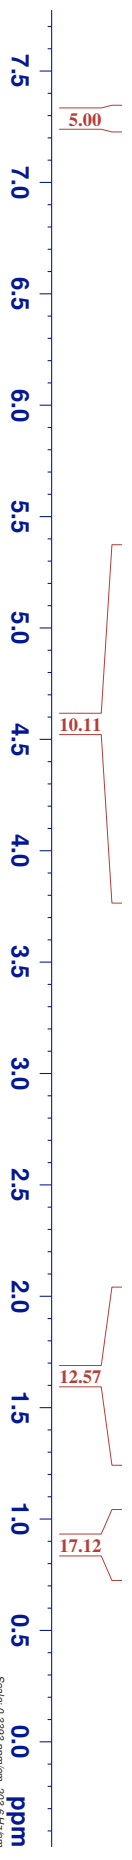

Scale: 0.3392 ppm/cm, 200.5162/cm

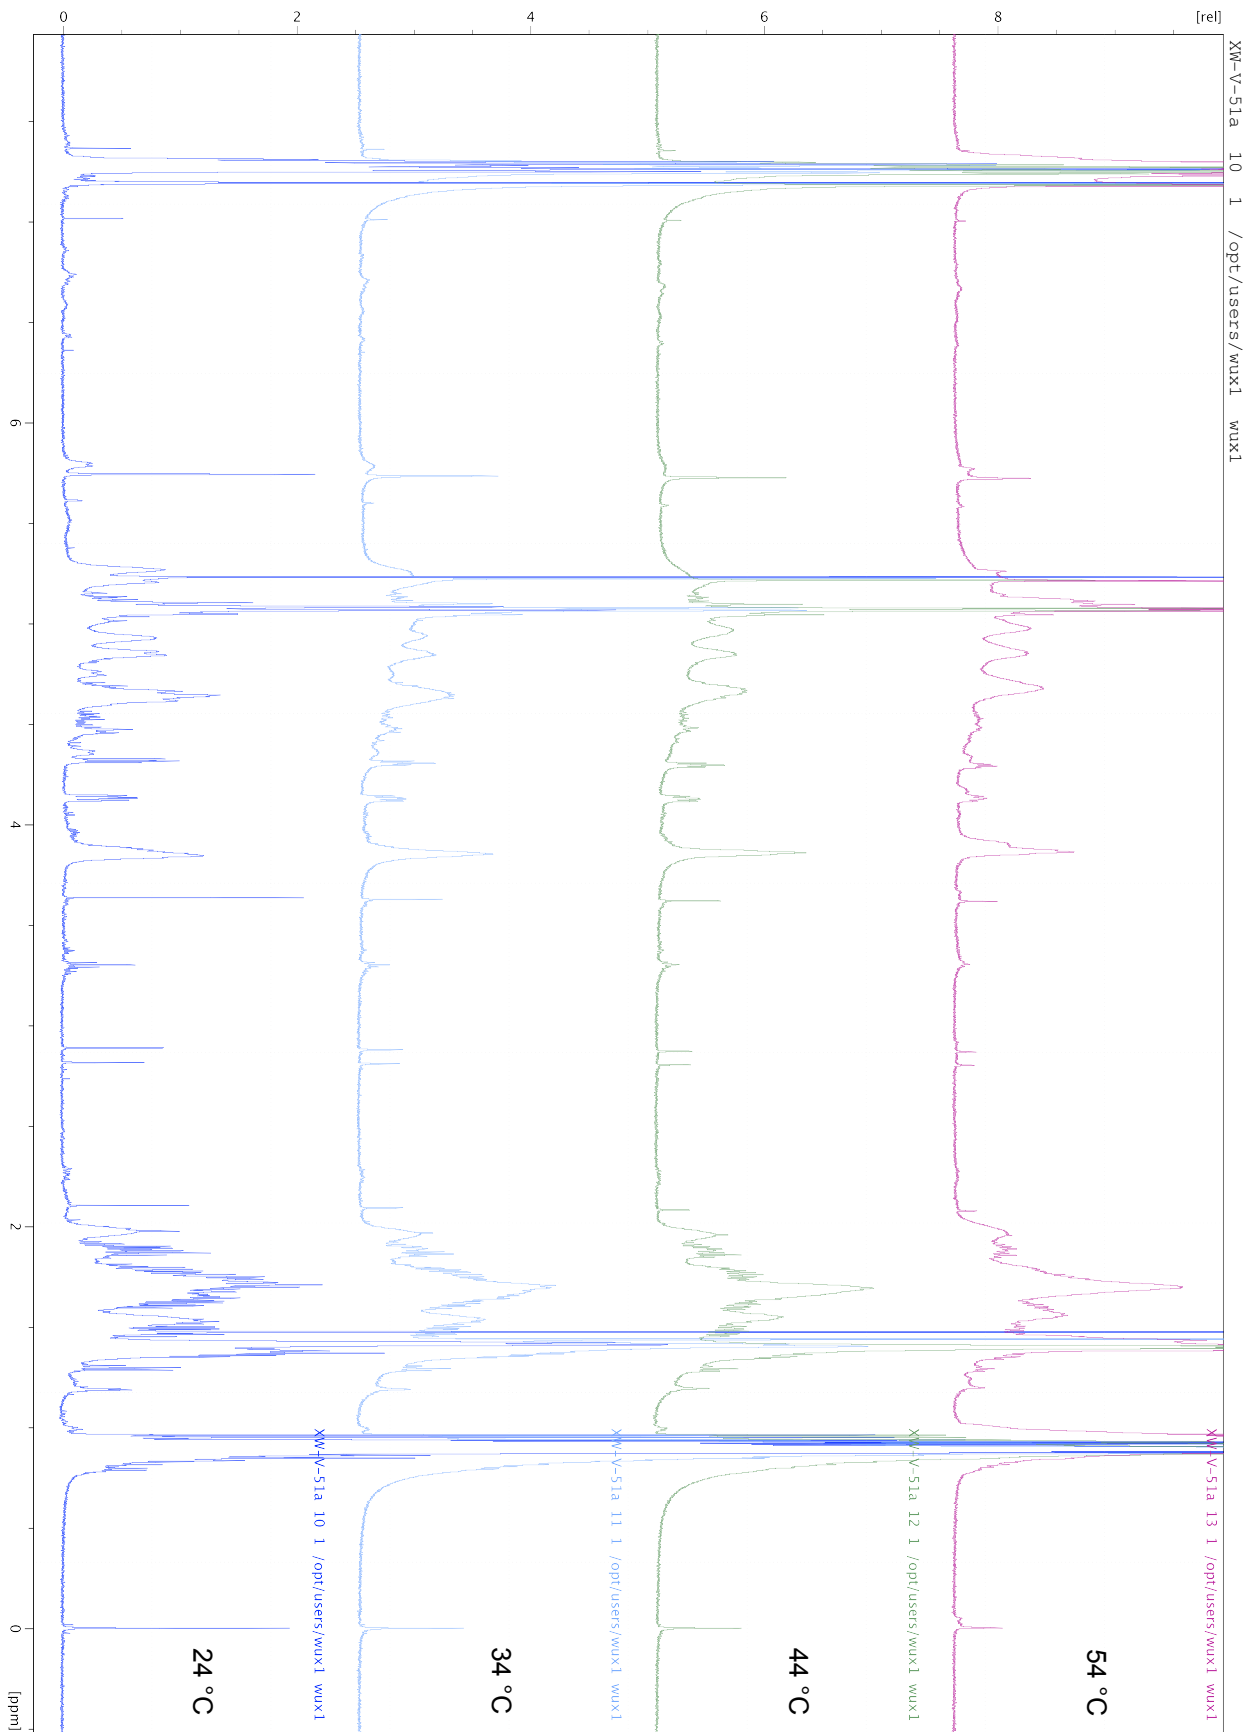

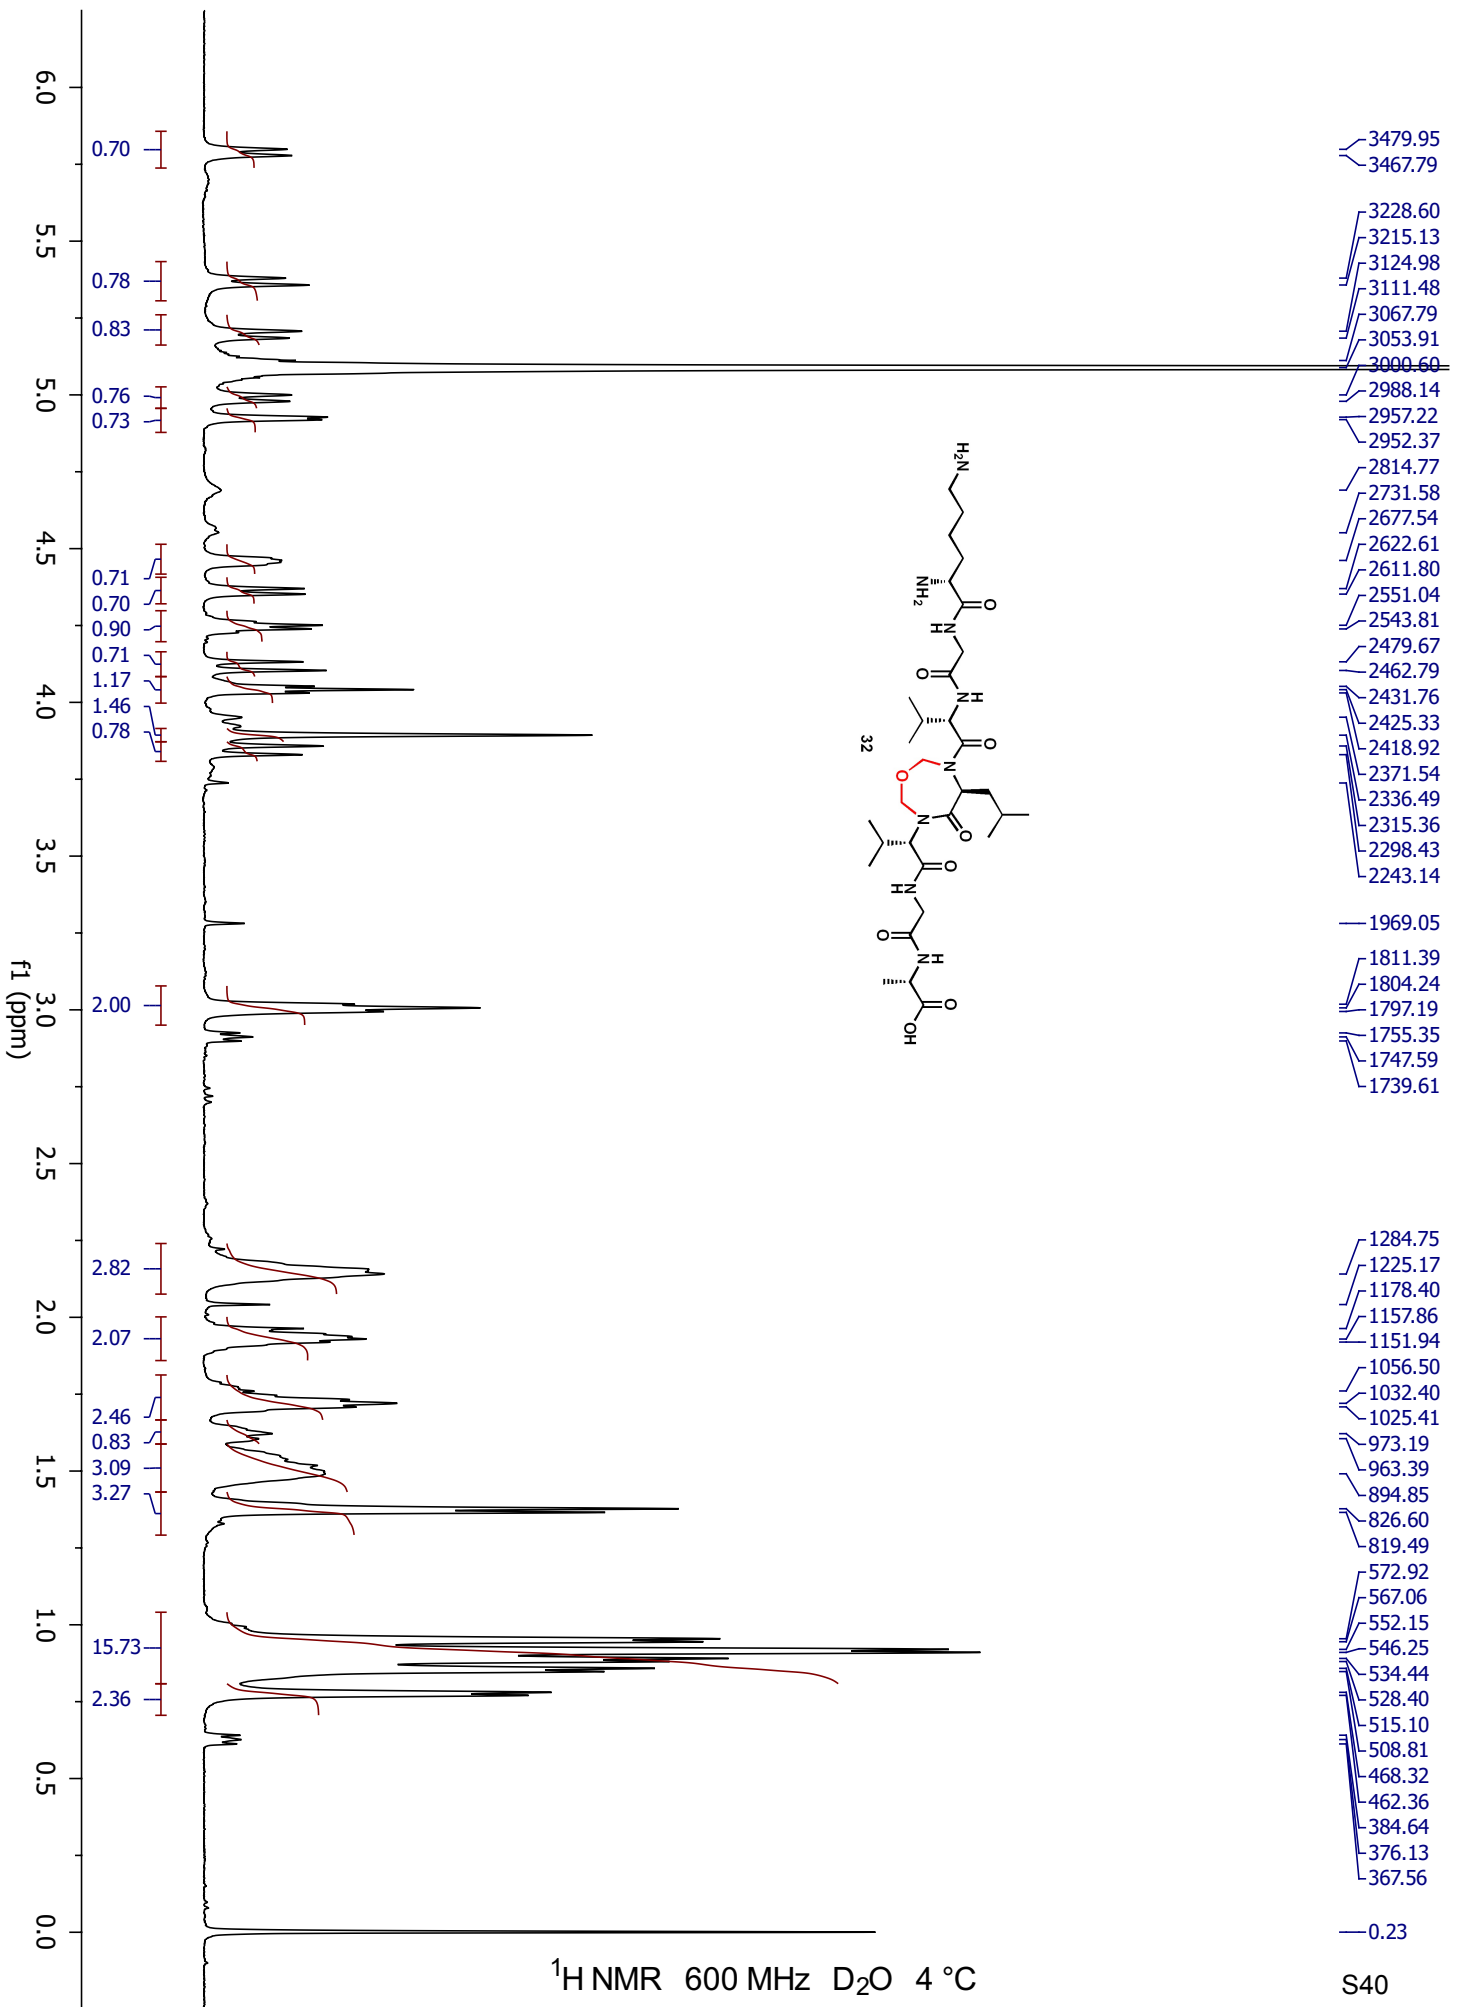

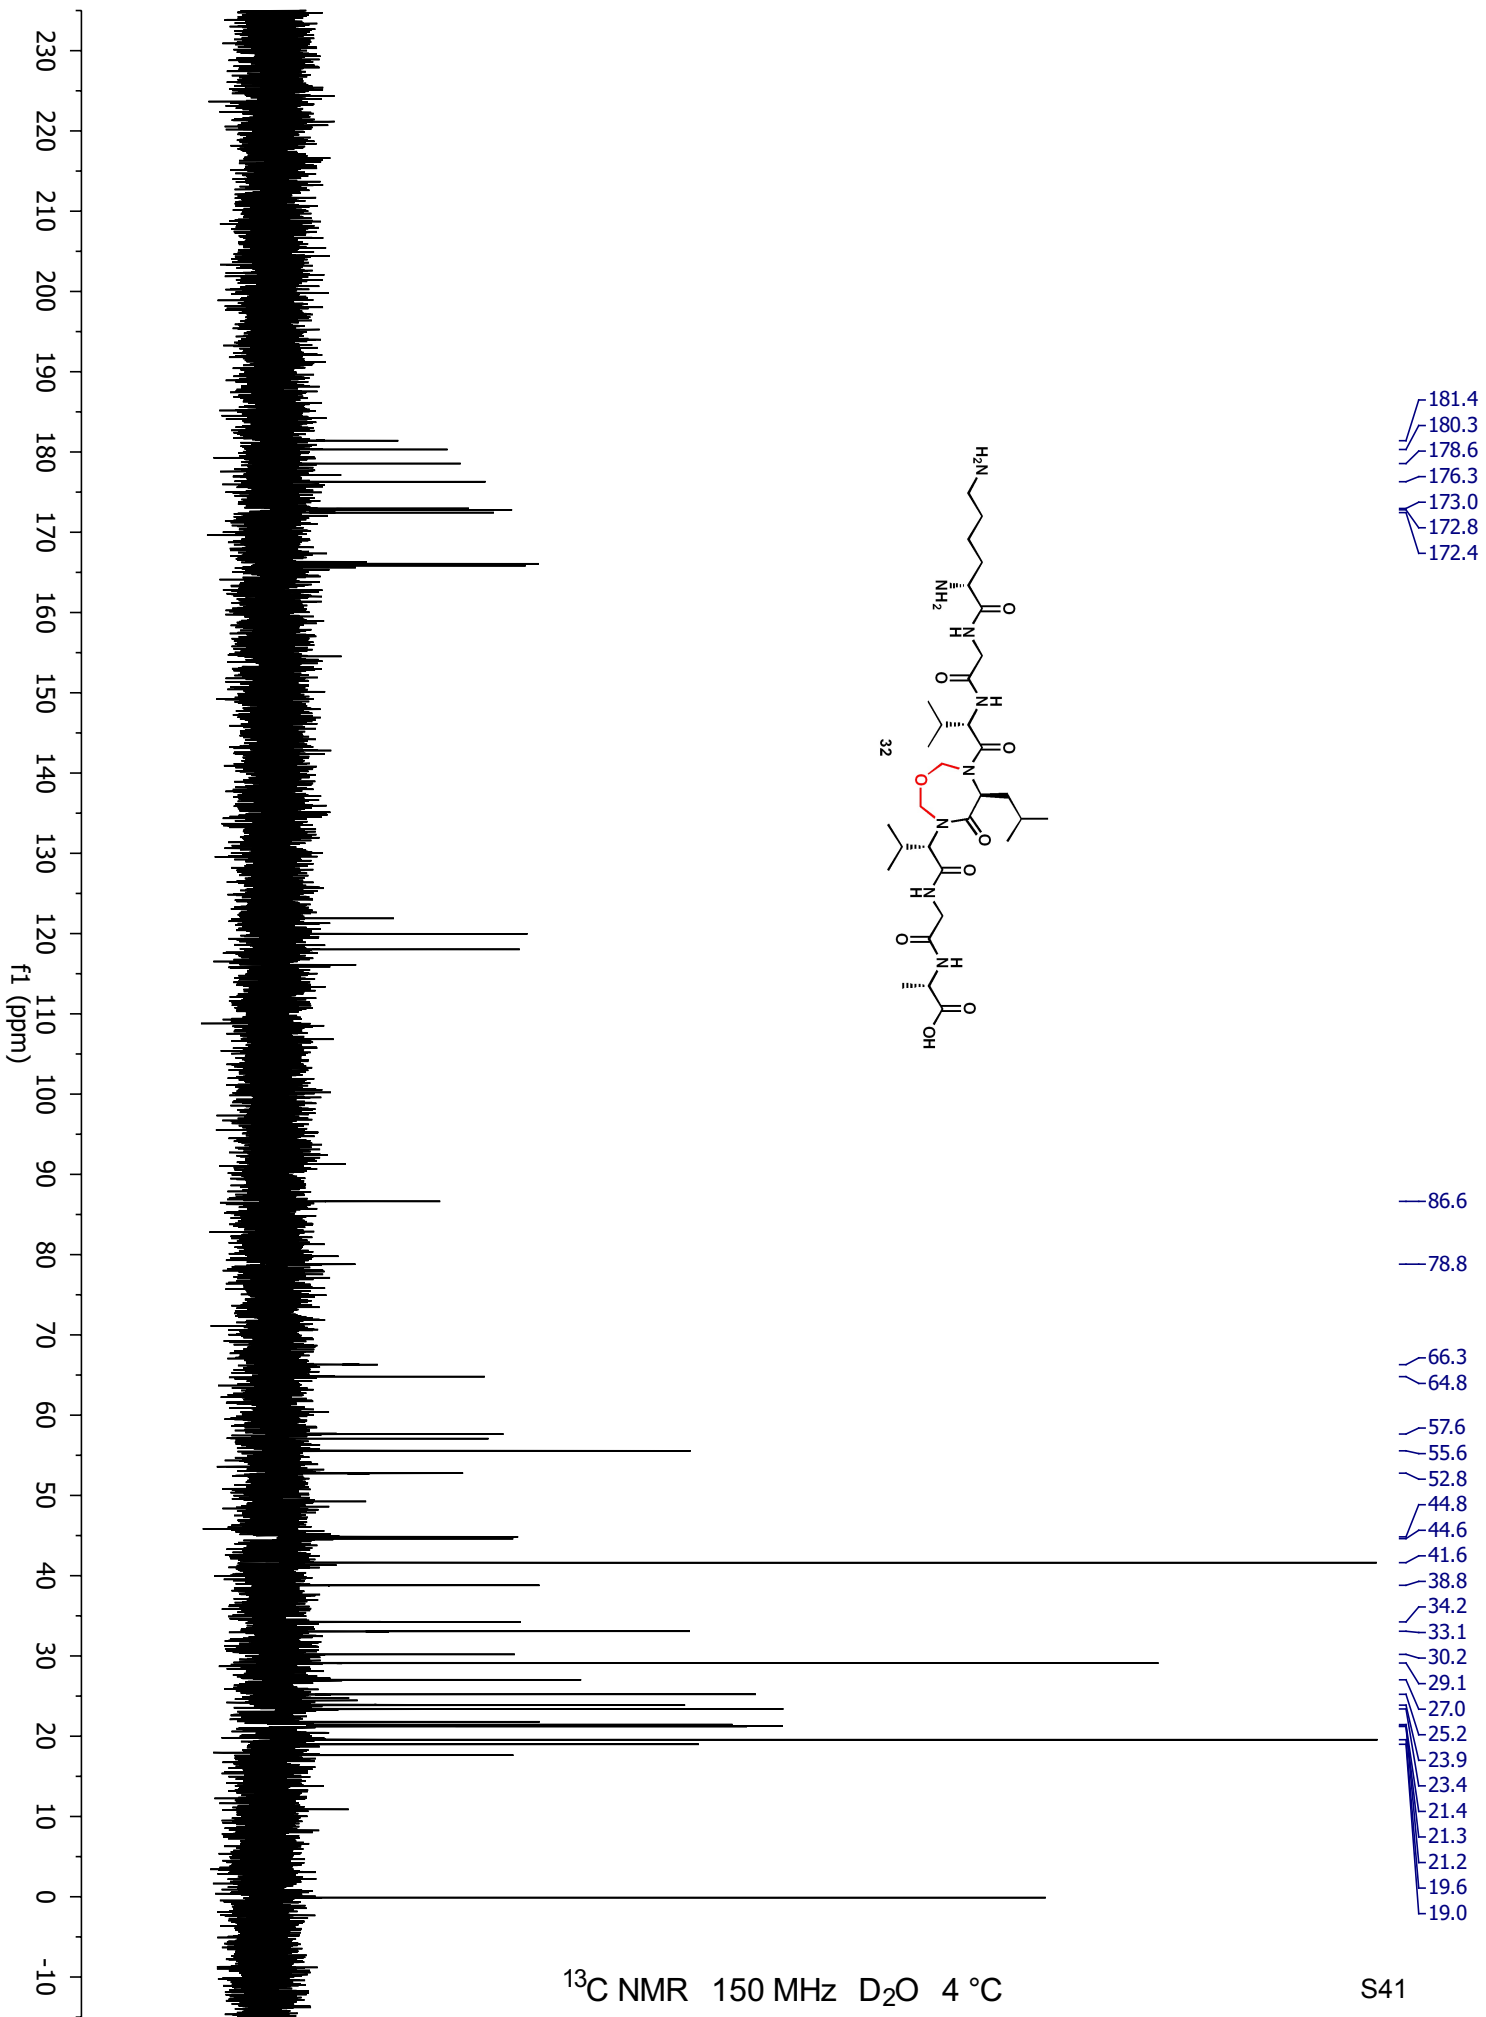

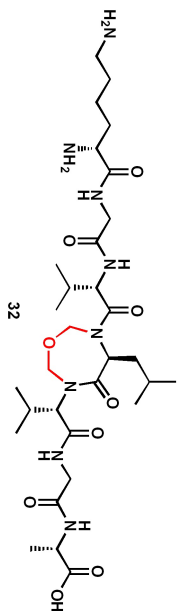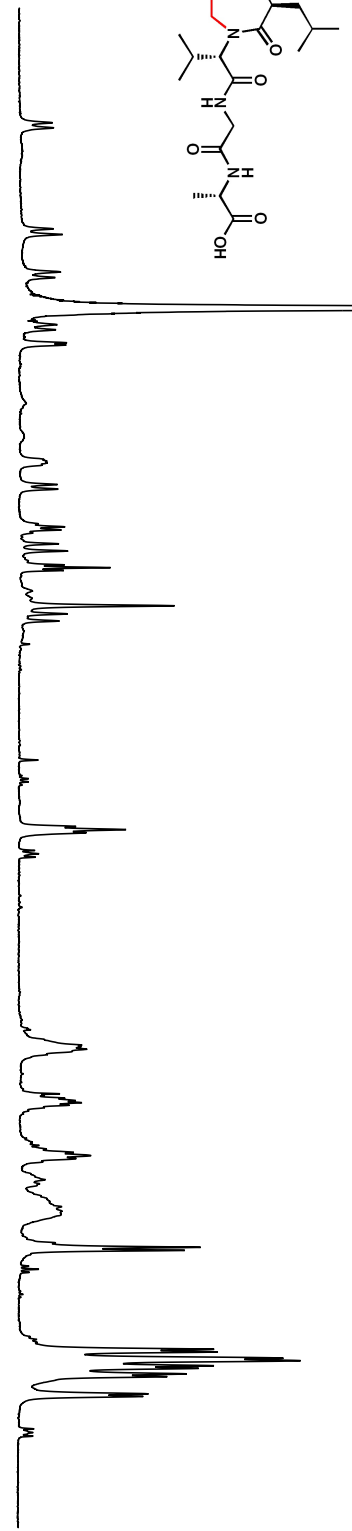

1H-1H COSY 600 MHz D2O 4 °C

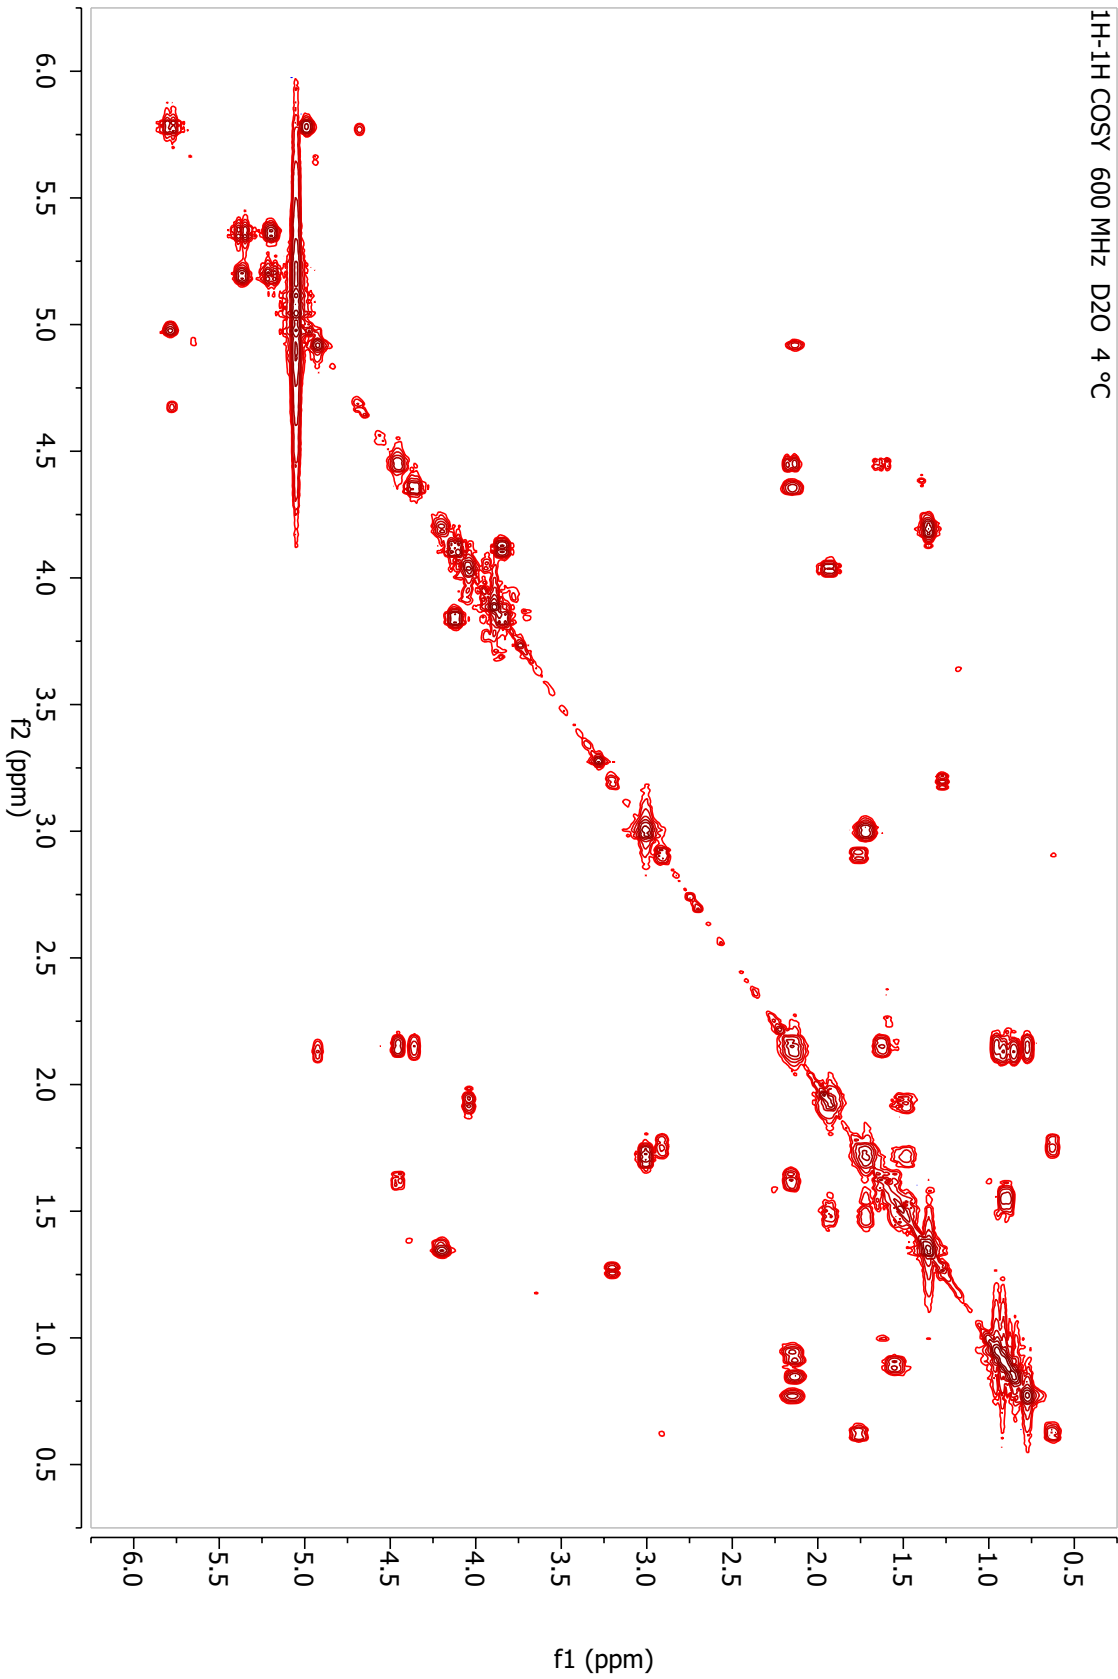

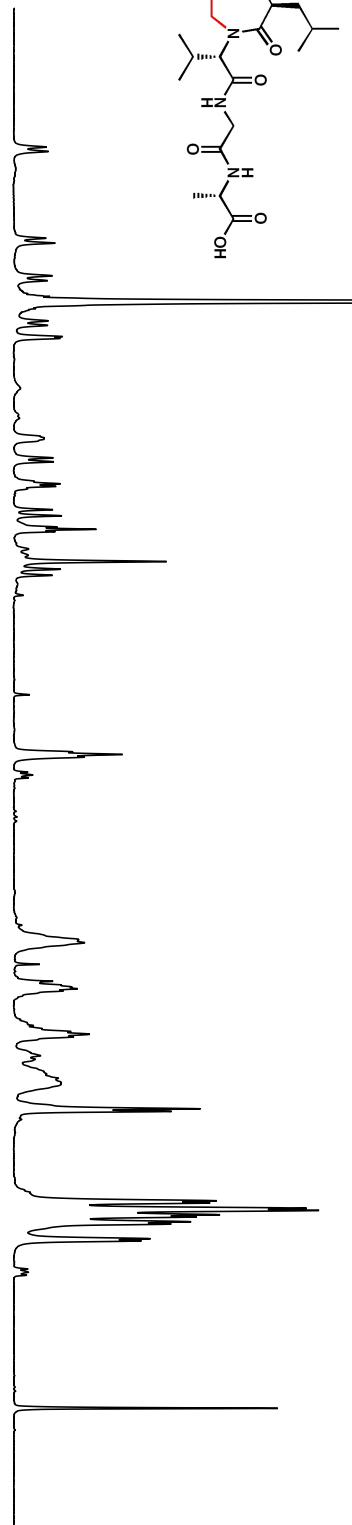

1H-13C HSQC 600 MHz D2O 4 °C

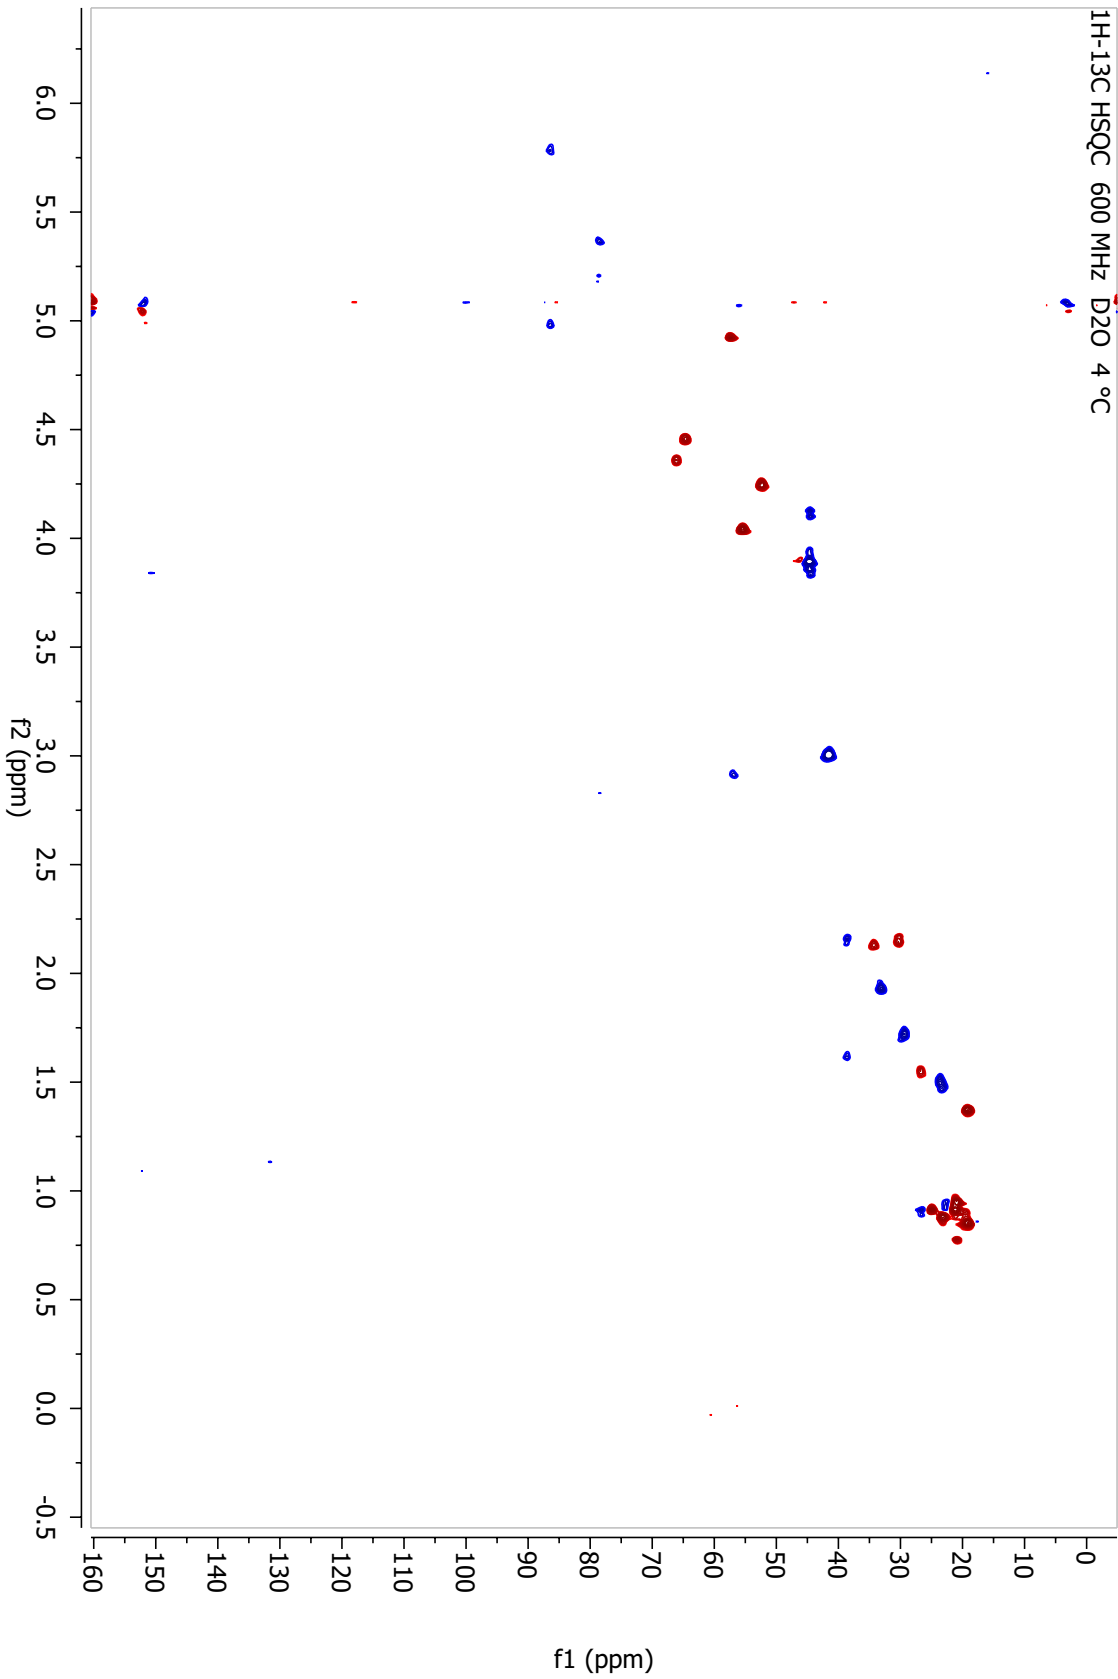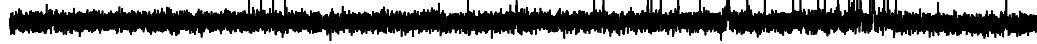

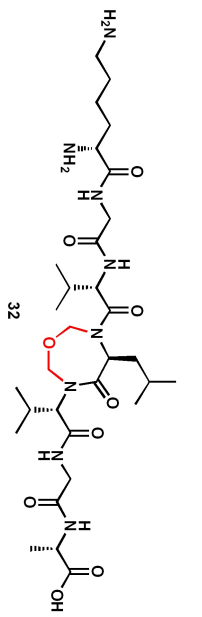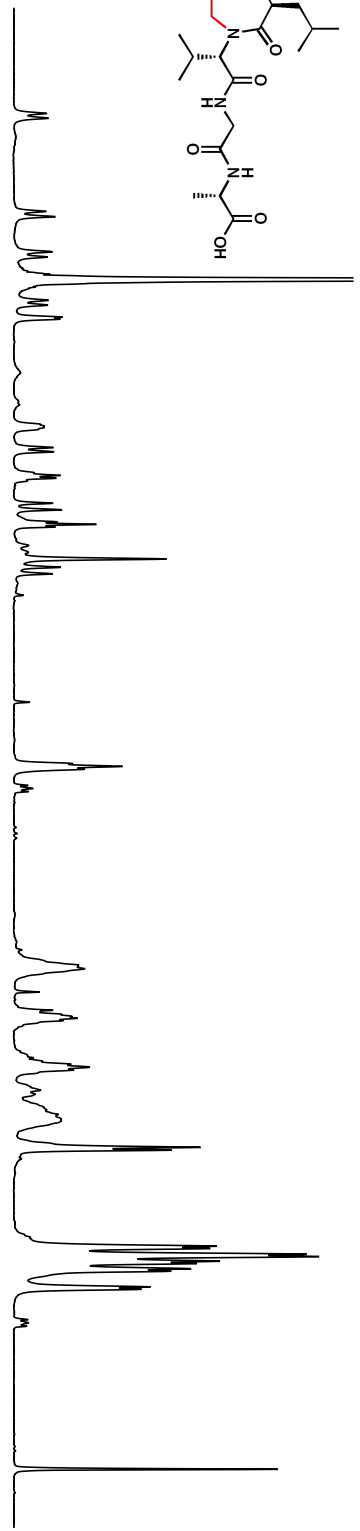

1H-13C HMBC 600 MHz D2O 4 °C

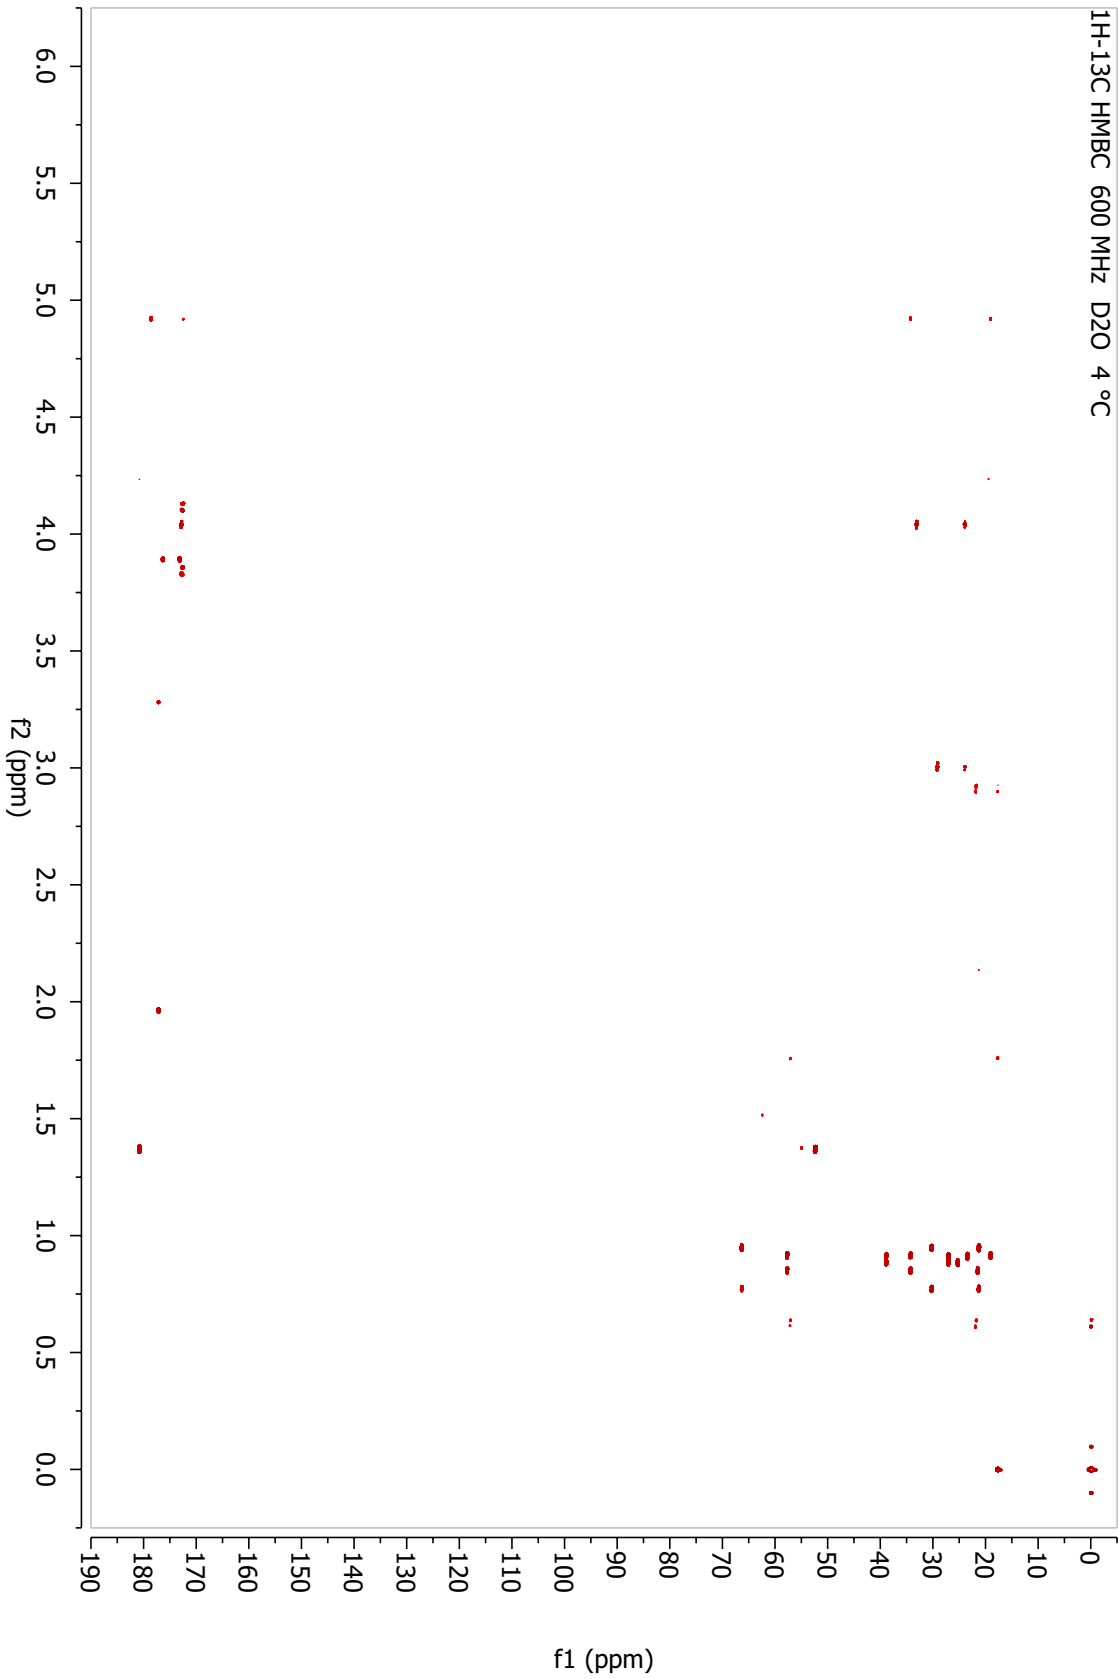



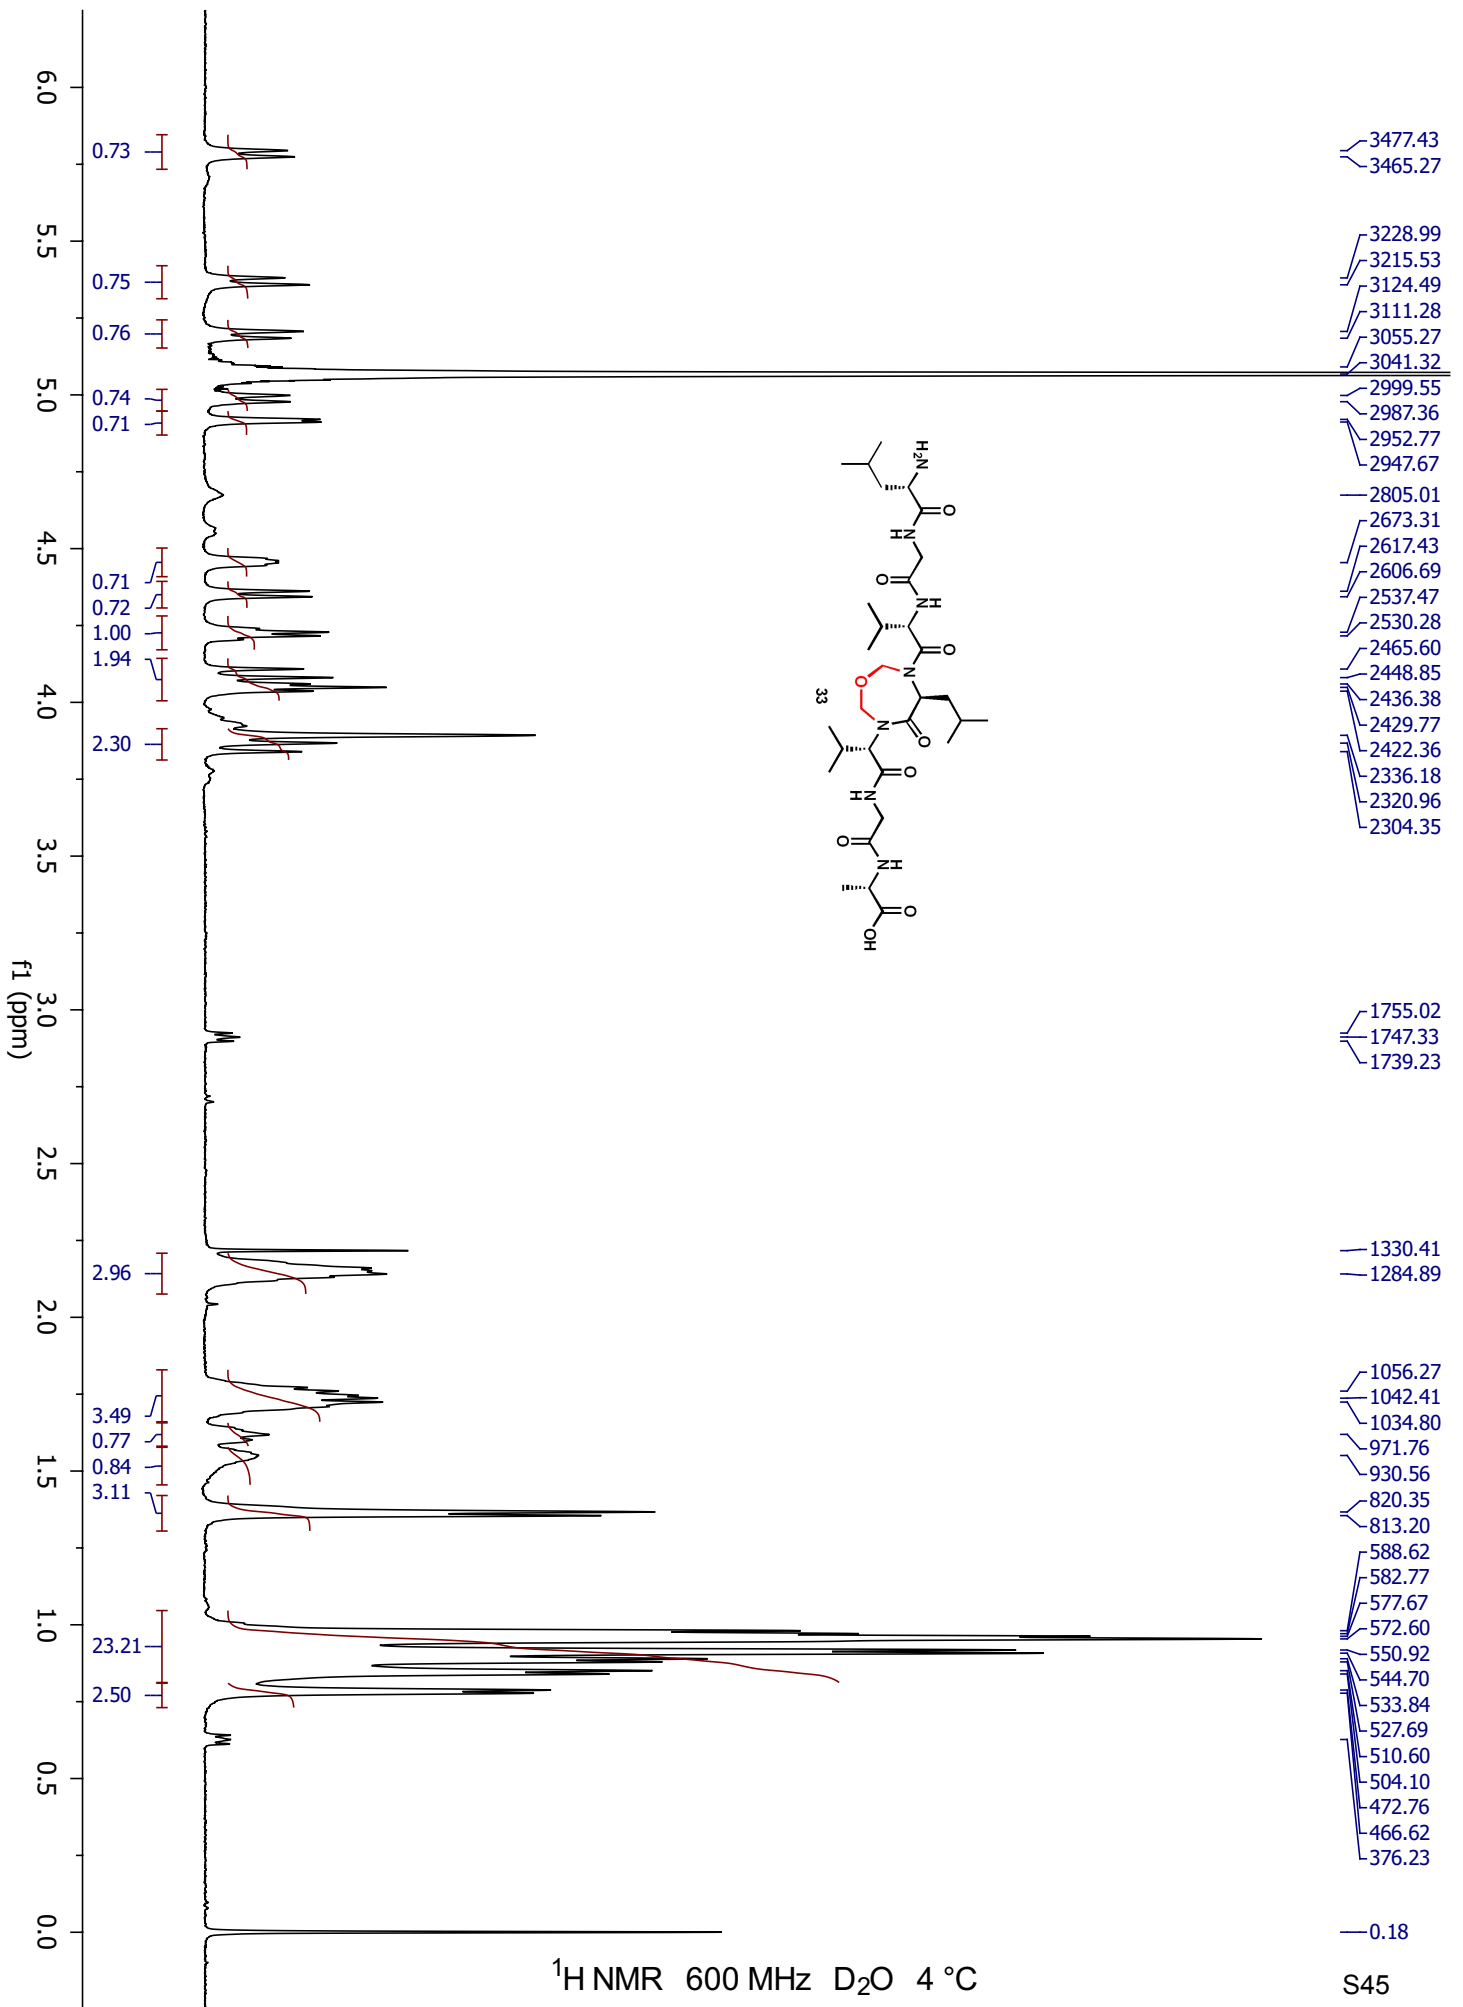



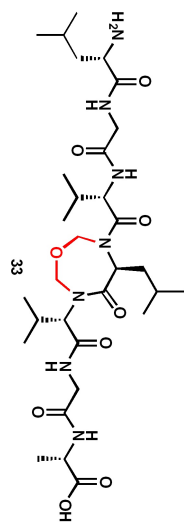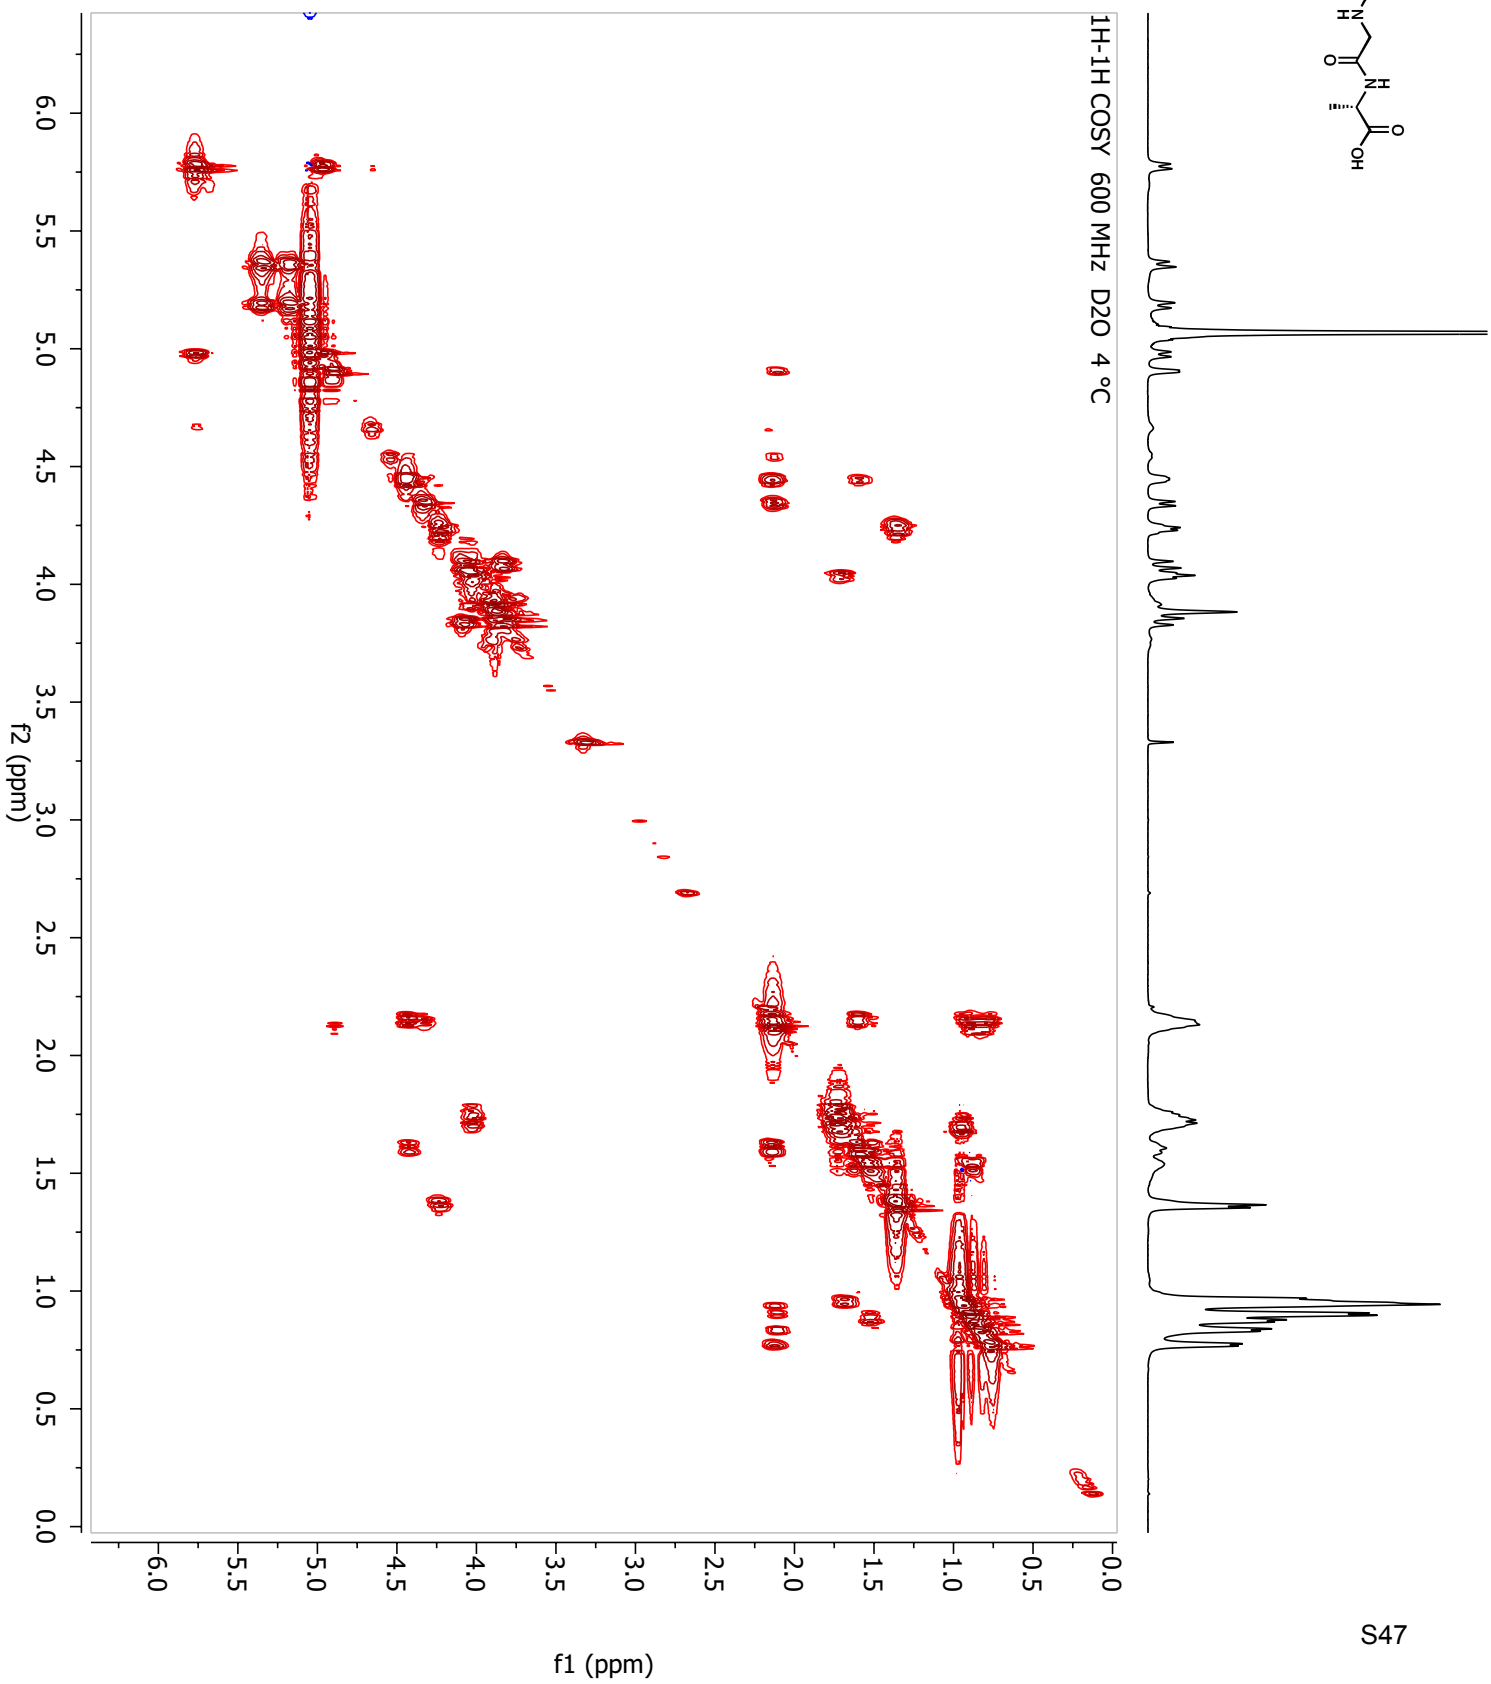

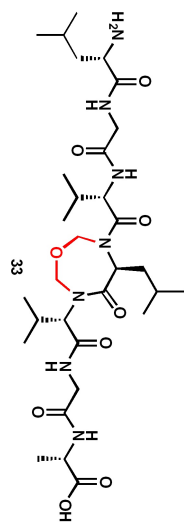

1H-13C HSQC 600 MHz, D2O 4 °C

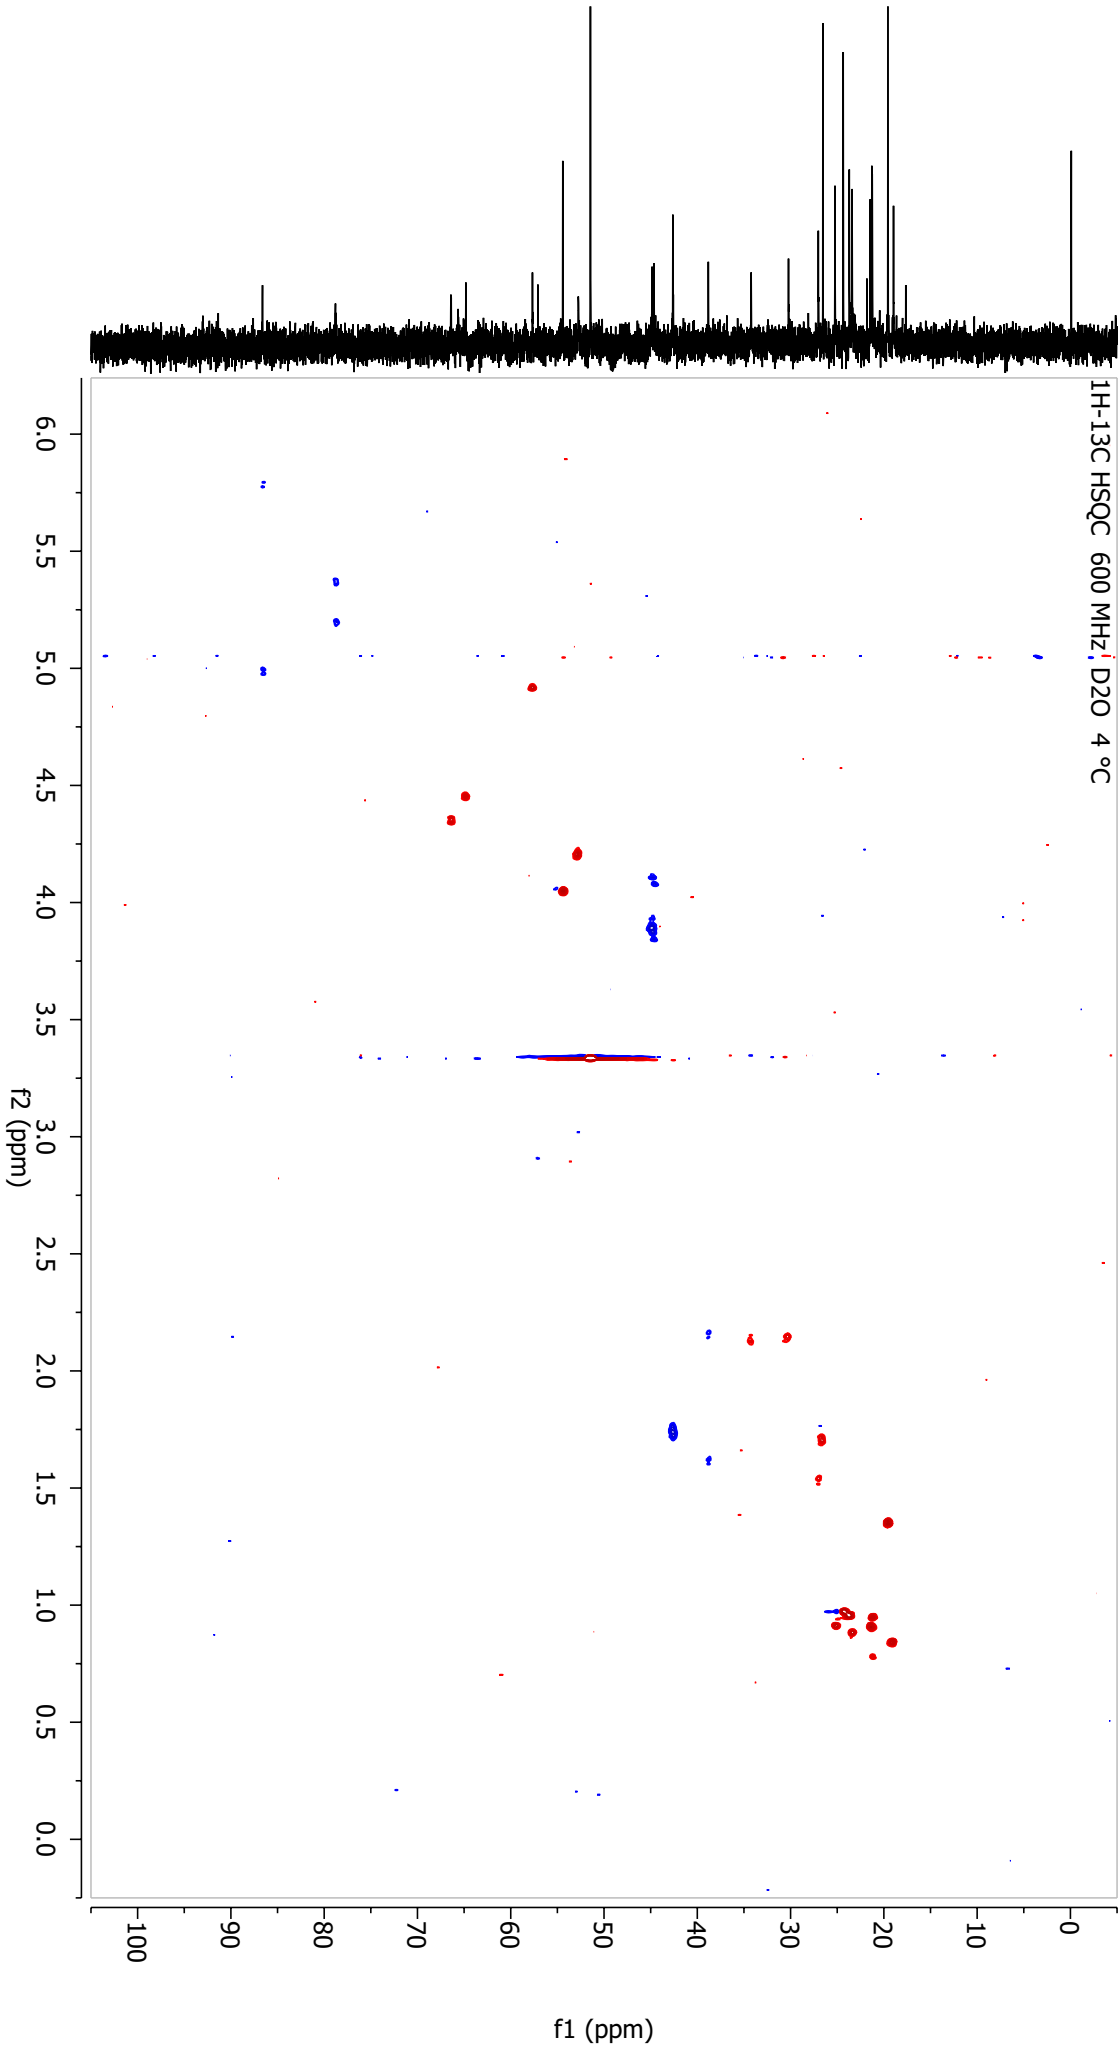



1H-13C HMBC 600 MHz D2O 4 °C

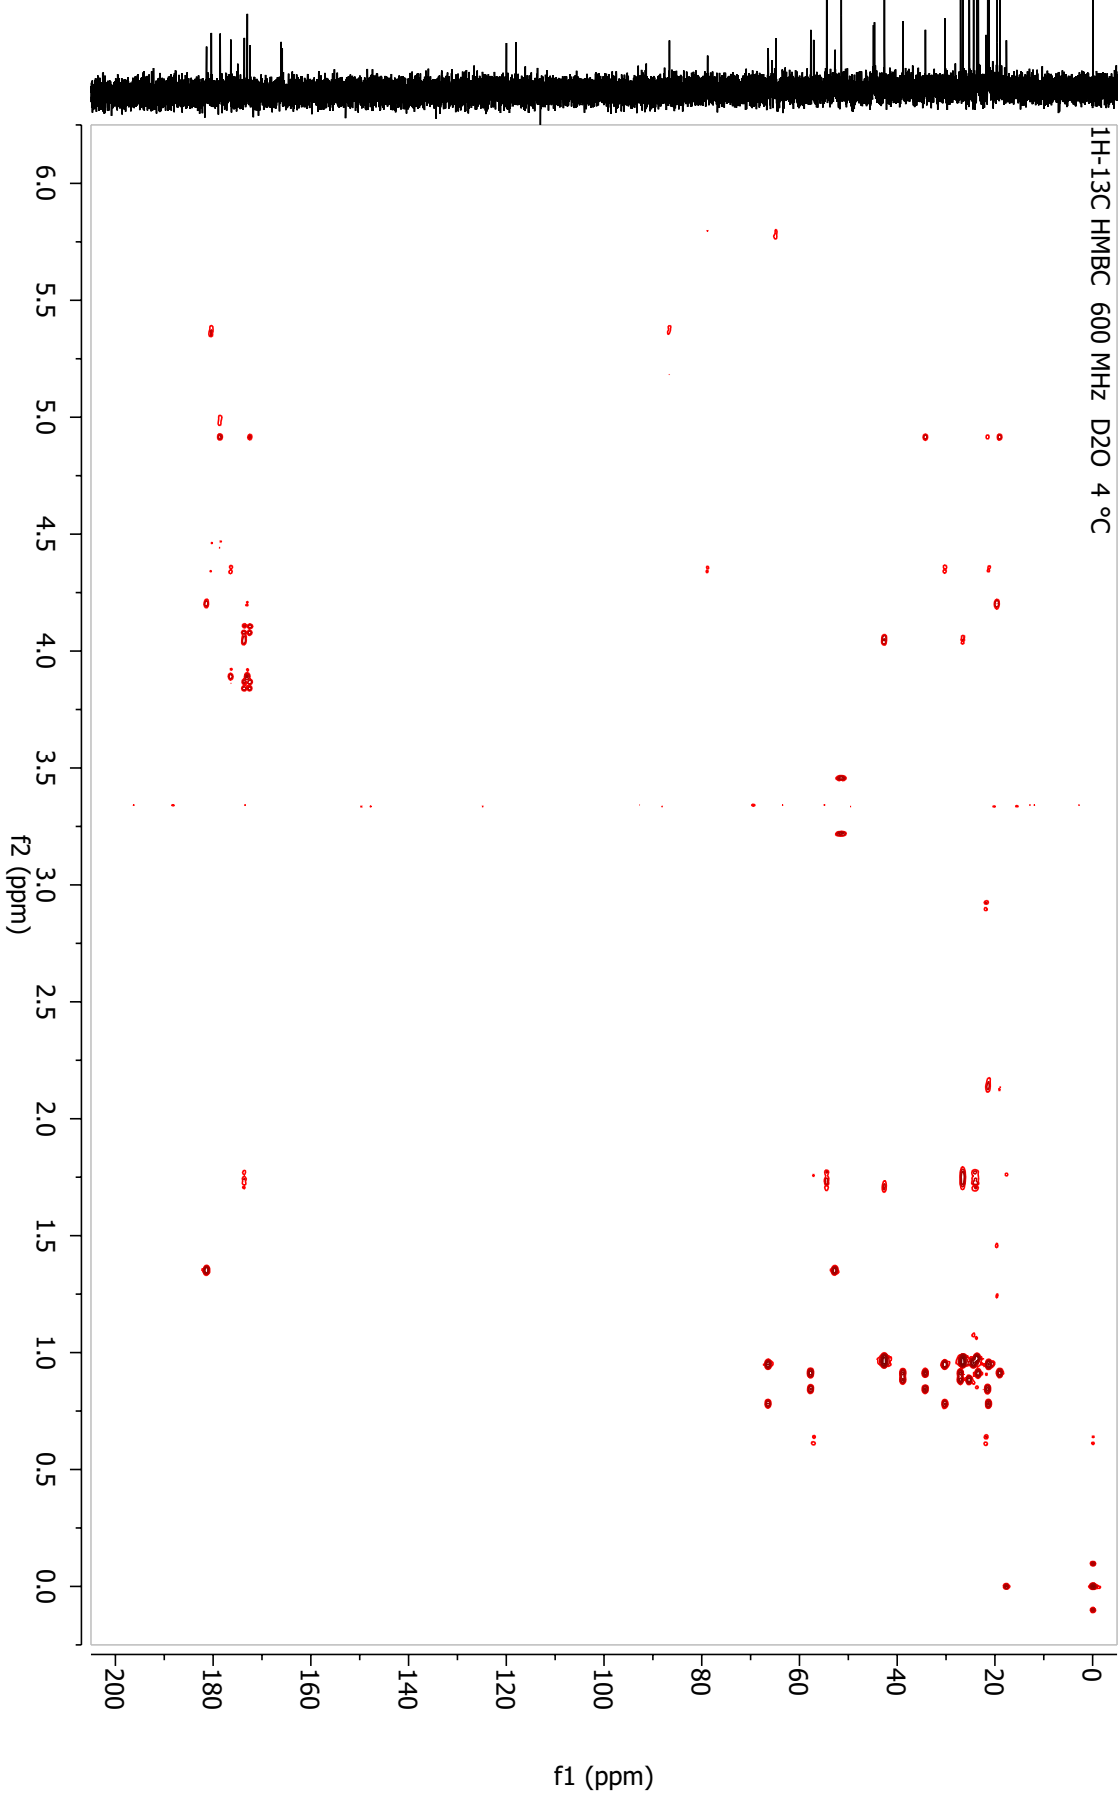

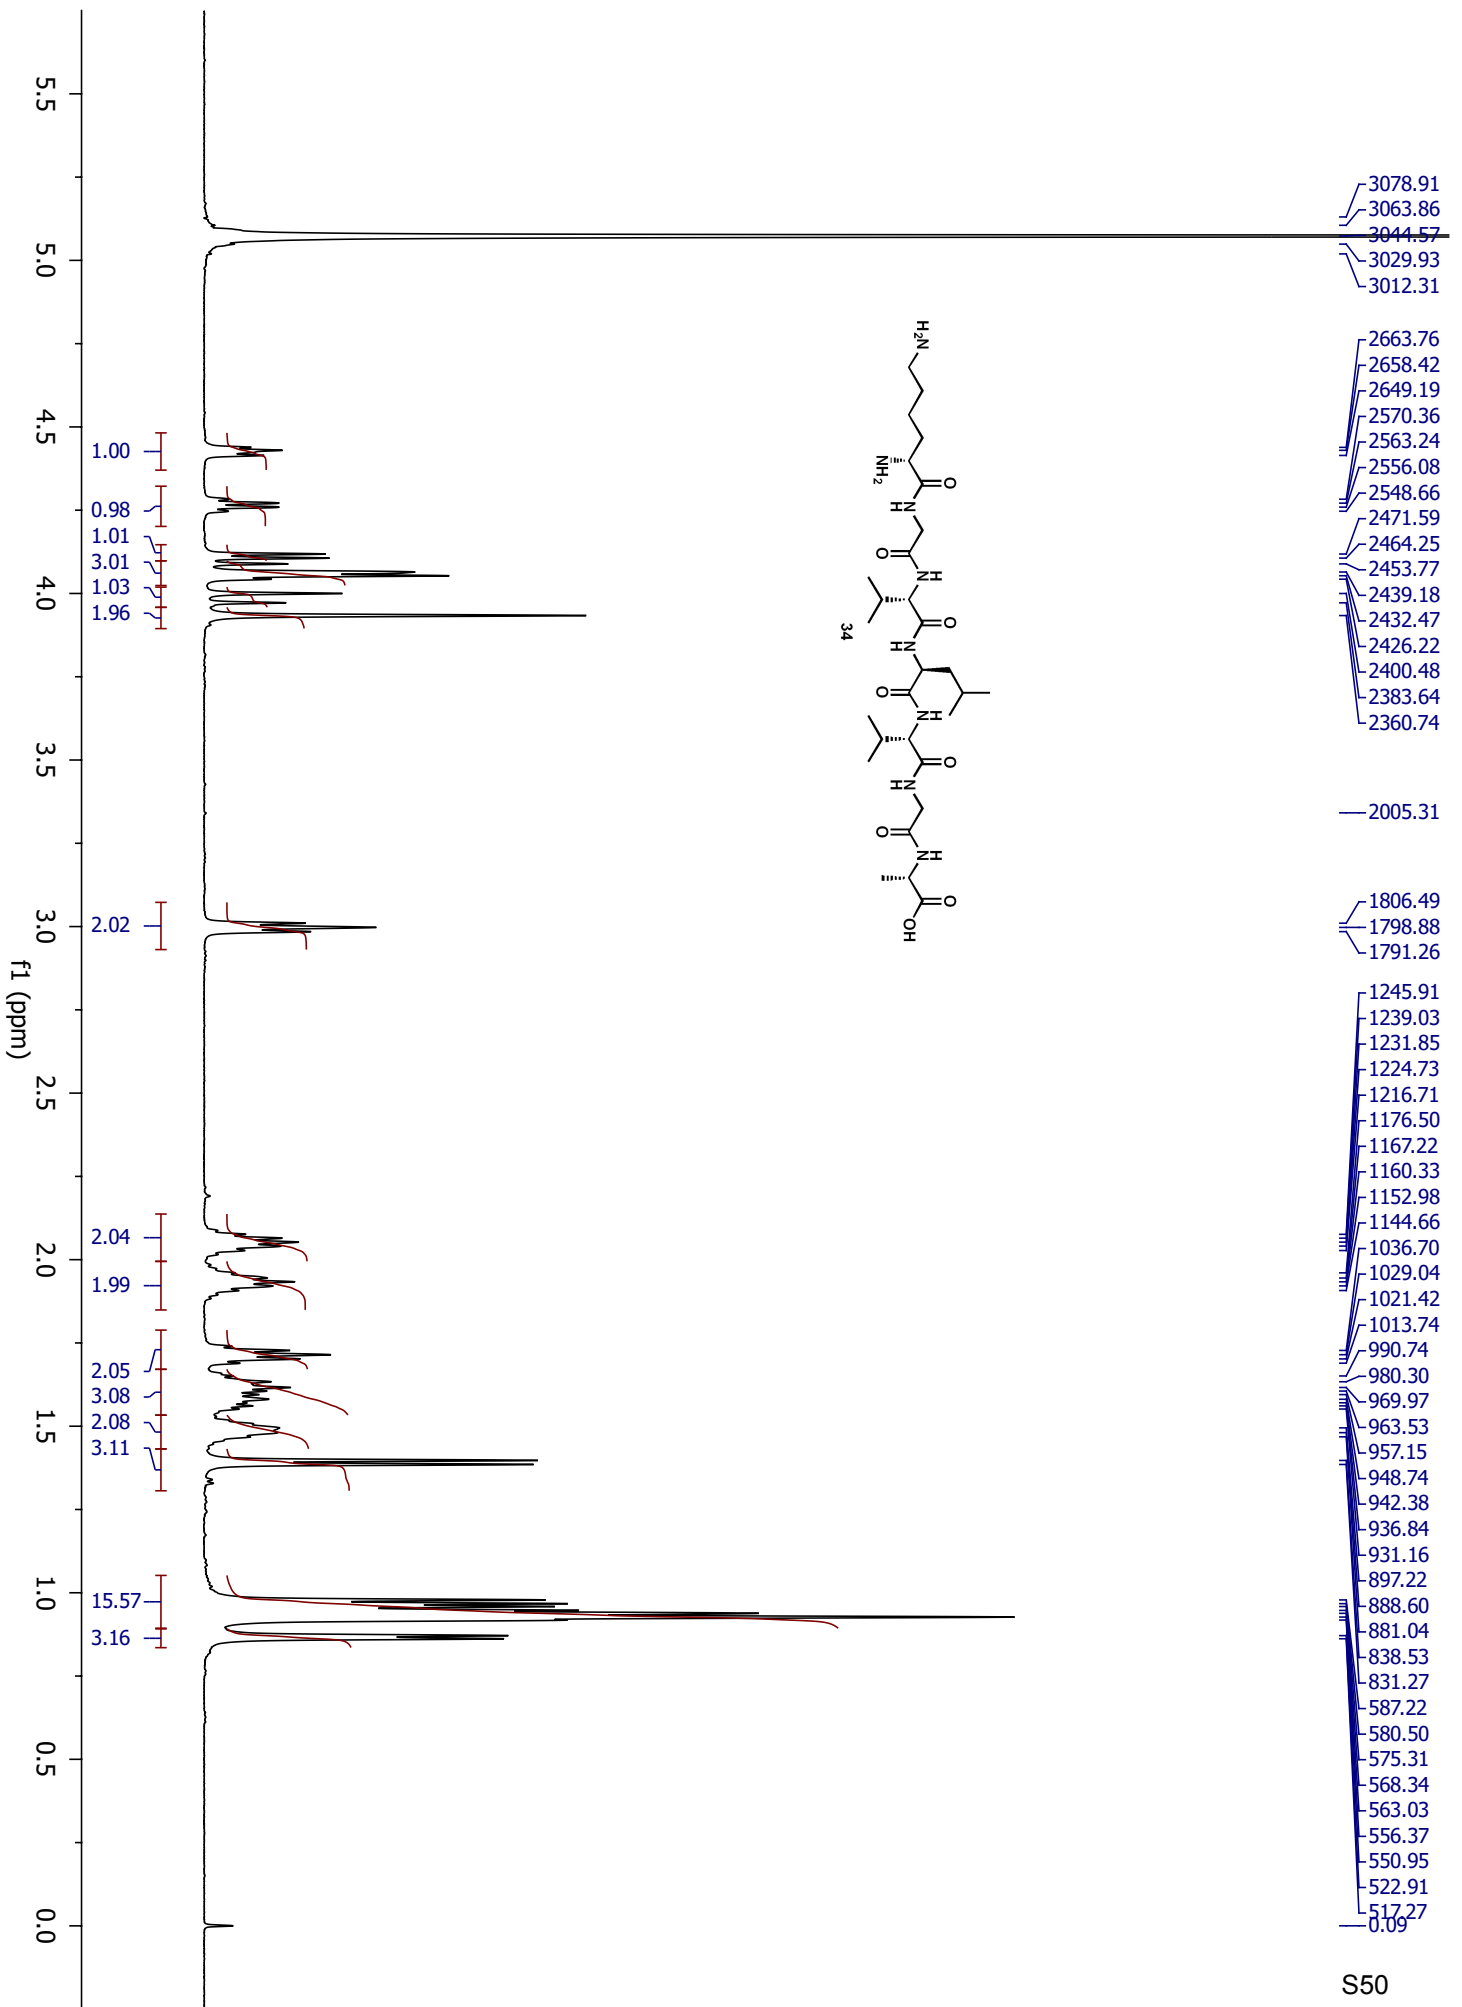

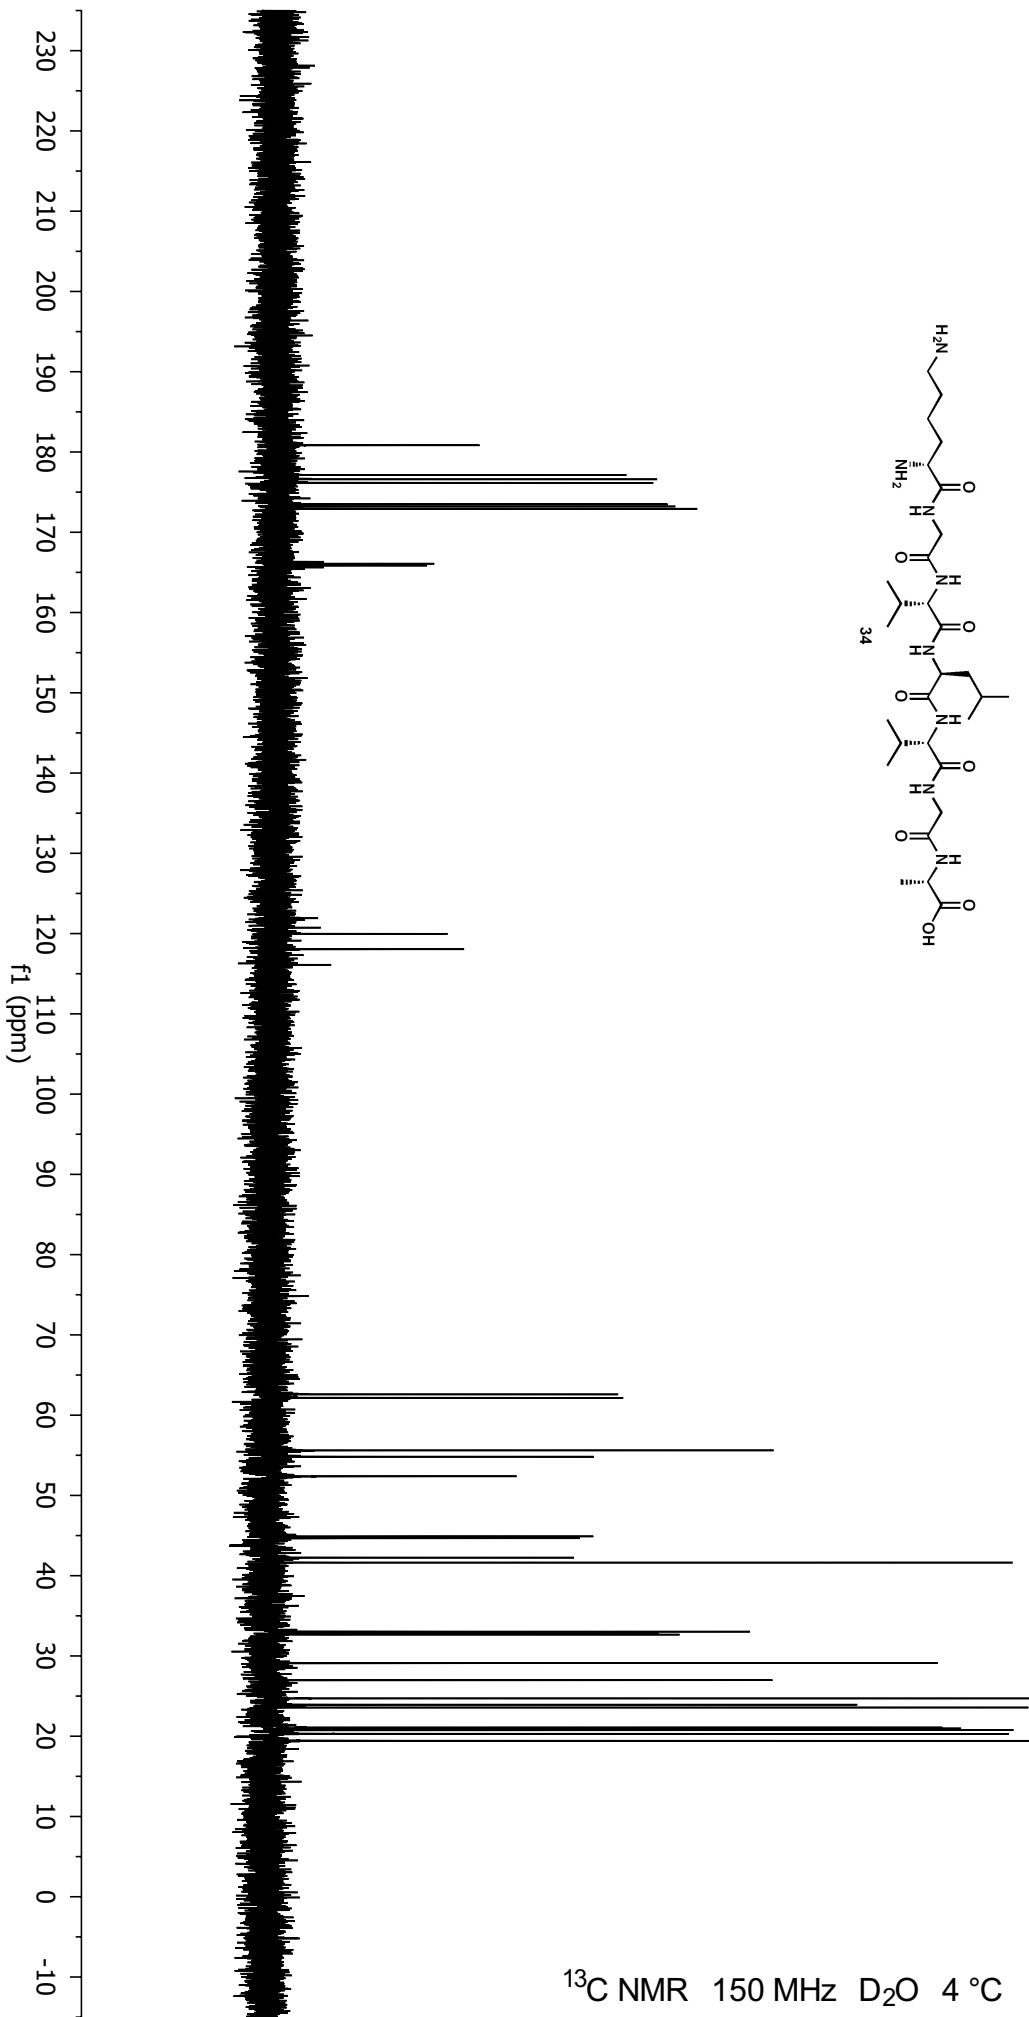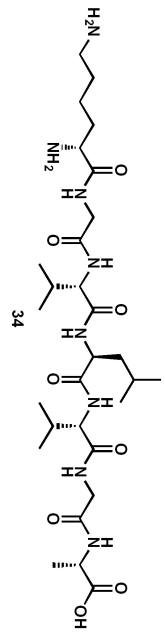

- 180.8
- 177.1
- 176.6
- 176.2
- 173.5
- 173.2
- 172.9

- 62.6
- 62.2
- 55.6
- 54.8
- 52.4

- 44.9
- 44.7
- 41.6
- 33.0
- 32.9
- 32.7
- 29.1
- 27.0
- 24.7
- 23.9
- 23.6
- 21.1
- 21.0
- 20.8
- 20.3
- 19.4





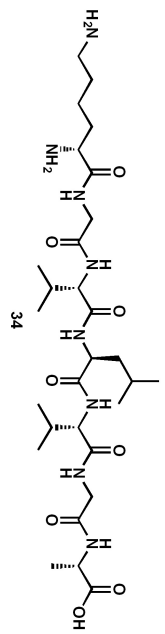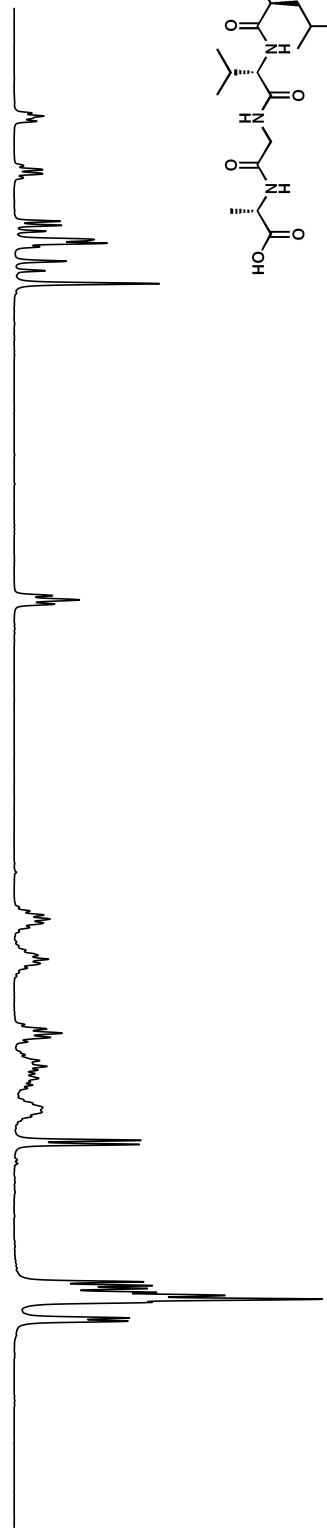

1H-13C HSQC 600 MHz D2O 4 °C

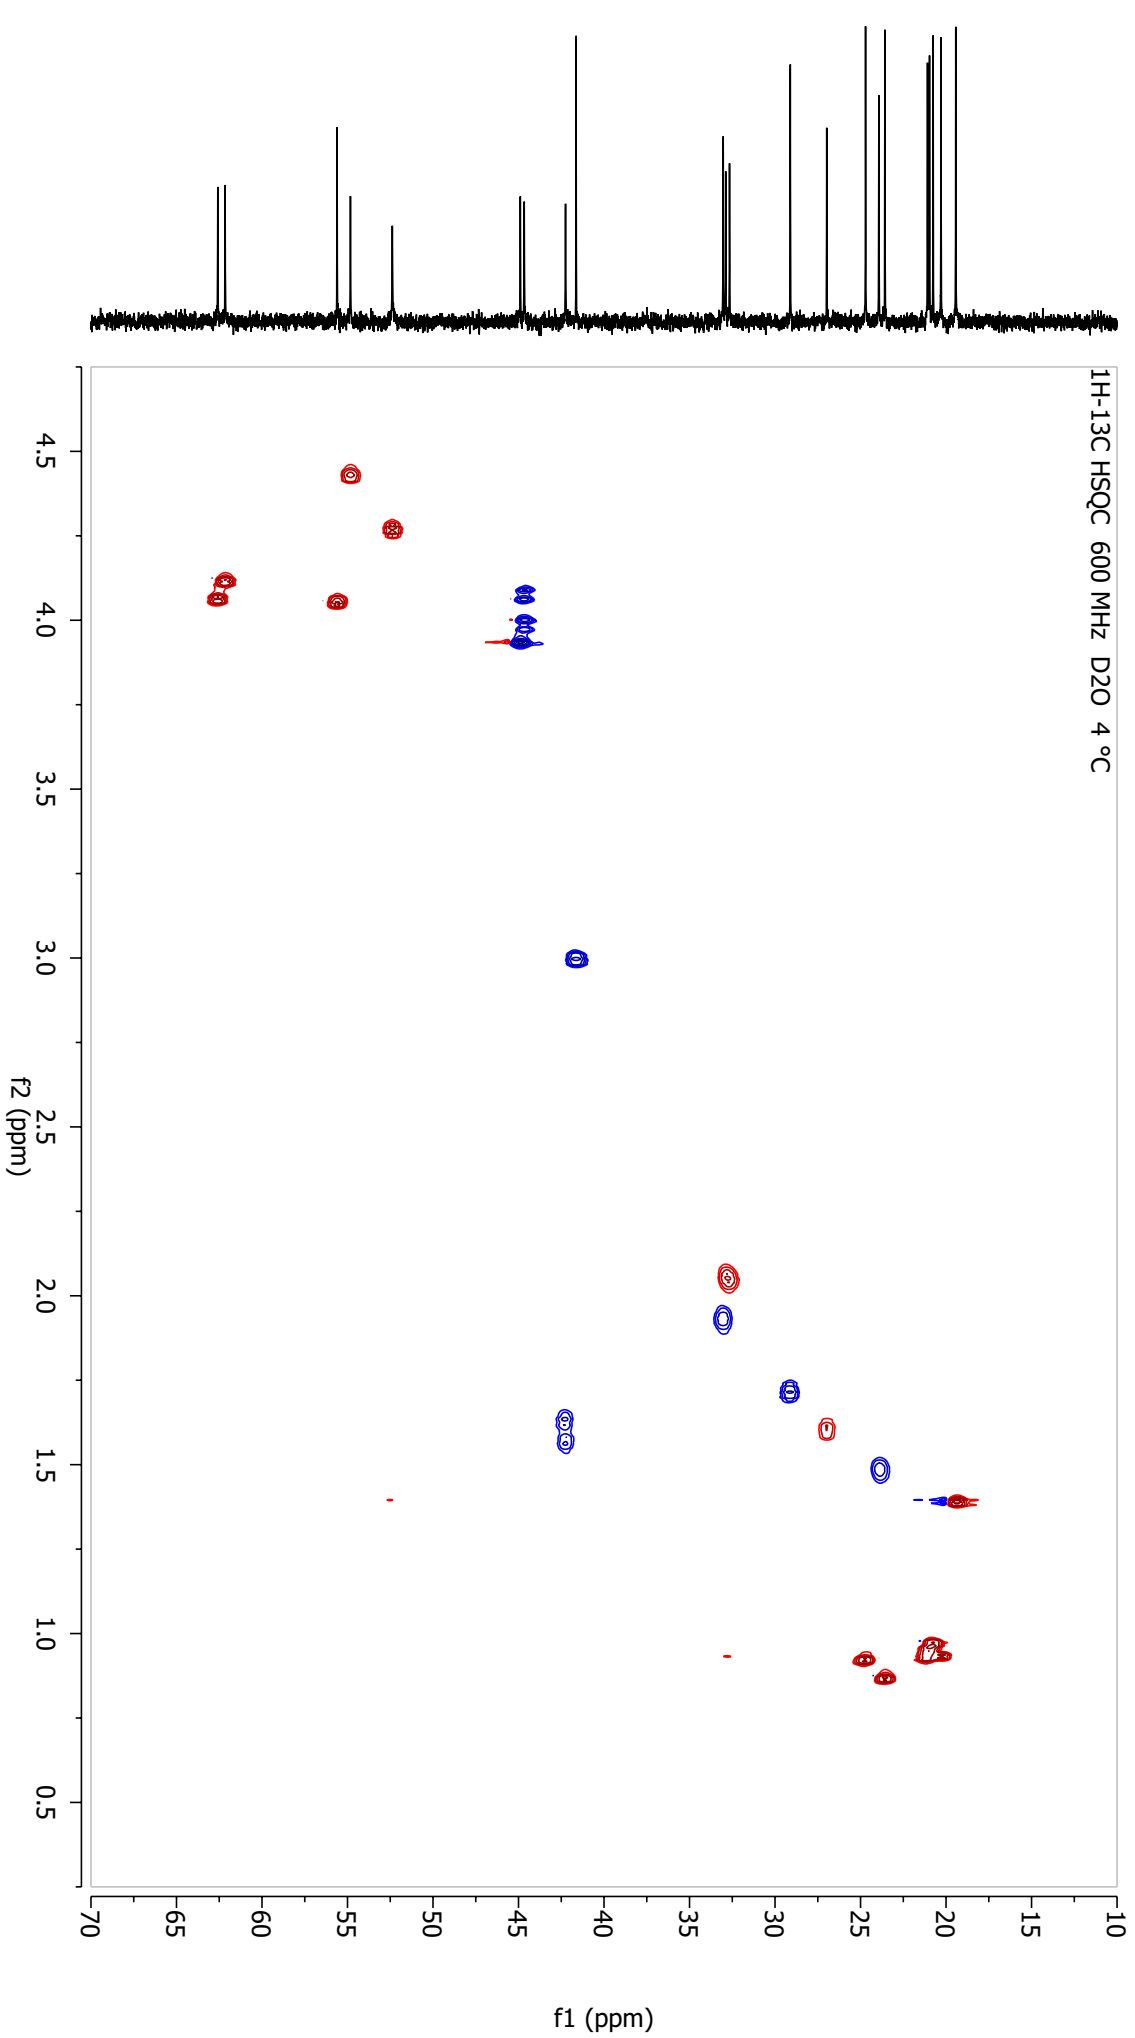

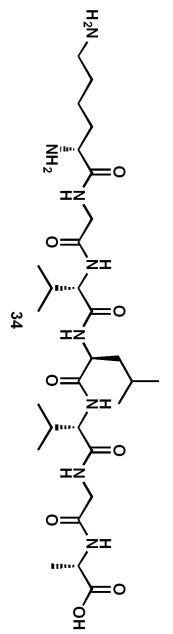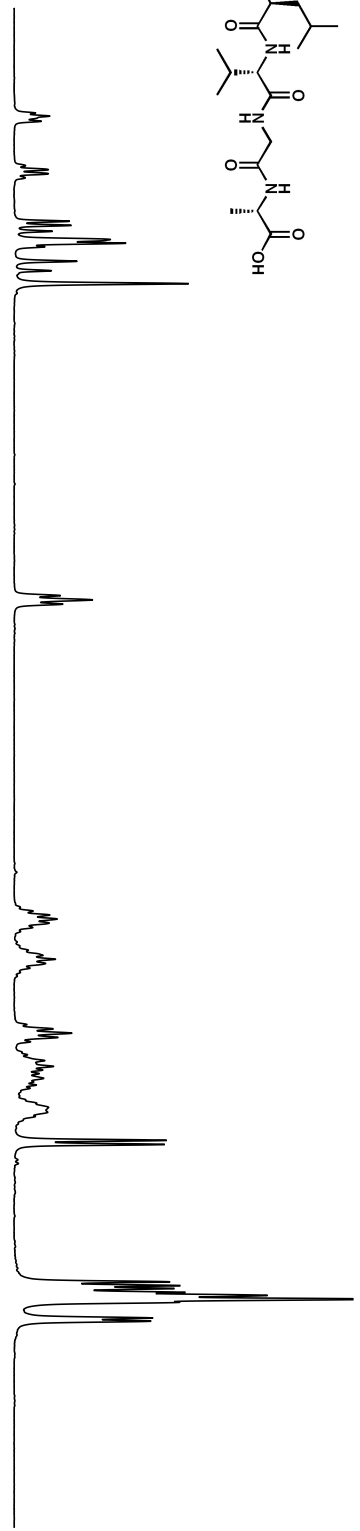

1H-13C HMQC 600 MHz D2O 4°C

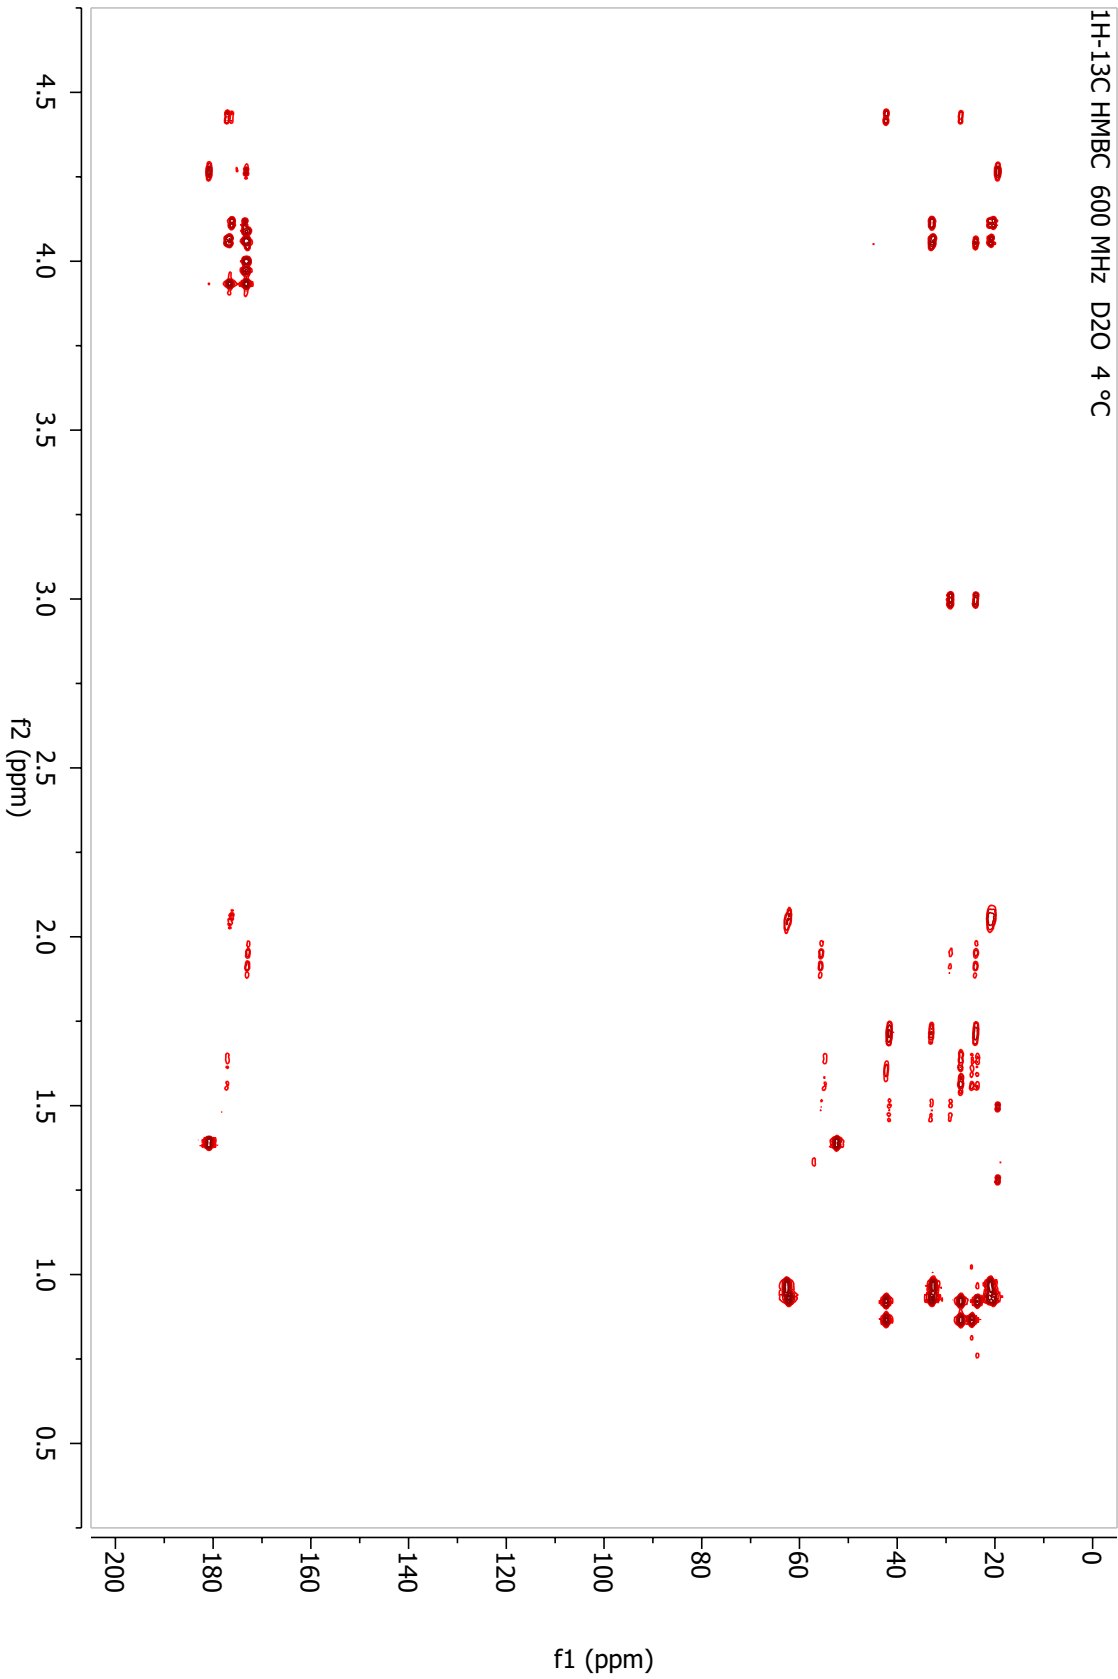

Supplement: NIHMS294143-supplement-1_si_001.pdf [file NIHMS294143-supplement-1_si_001.pdf]
